# Supplementary material for: Design, Synthesis and Antitumor Evaluation of Novel Pyrazolopyrimidines and Pyrazoloquinazolines
Source: PubMed Central journal article supplement (PMC6100441; doi:10.3390/molecules23061249), 2018-05-23
Supplement: molecules-23-01249-s001.pdf [file molecules-23-01249-s001.pdf]

# **SUPPLEMENTARY MATERIAL**

*for*

## **Design, synthesis and antitumor evaluation of novel pyrazolopyrimidines and pyrazoloquinazolines**

**Mohamed El-Naggar<sup>1</sup>, Ashraf S. Hassan<sup>2,\*</sup>, Hanem M. Awad<sup>3</sup> and Mohamed F. Mady<sup>4,5,\*</sup>**

<sup>1</sup>Chemistry Department, Faculty of Sciences, University of Sharjah, Sharjah, UAE, 27272;  
M5elnaggar@yahoo.com

<sup>2</sup>Organometallic and Organometalloid Chemistry Department, National Research Centre, Dokki 12622 Cairo, Egypt; ashraf\_salmoon@yahoo.com

<sup>3</sup>Department of Tanning Materials and Leather Technology, National Research Centre, Dokki 12622, Cairo, Egypt; hanem\_awad@yahoo.com

<sup>4</sup>Department of Green Chemistry, National Research Centre, Dokki 12622, Cairo, Egypt

<sup>5</sup>Department of Mathematics and Natural Science, Faculty of Science and Technology, University of Stavanger, N-4036 Stavanger, Norway; mohamed.mady@uis.no

\* Authors to whom correspondence should be addressed; E-Mails: ashraf\_salmoon@yahoo.com (A.S.H); mohamed.mady@uis.no (M.F.M); Tel.: +20-100-664-5444 (A. S. H.); +47-912-569-33 (M. F. M.).

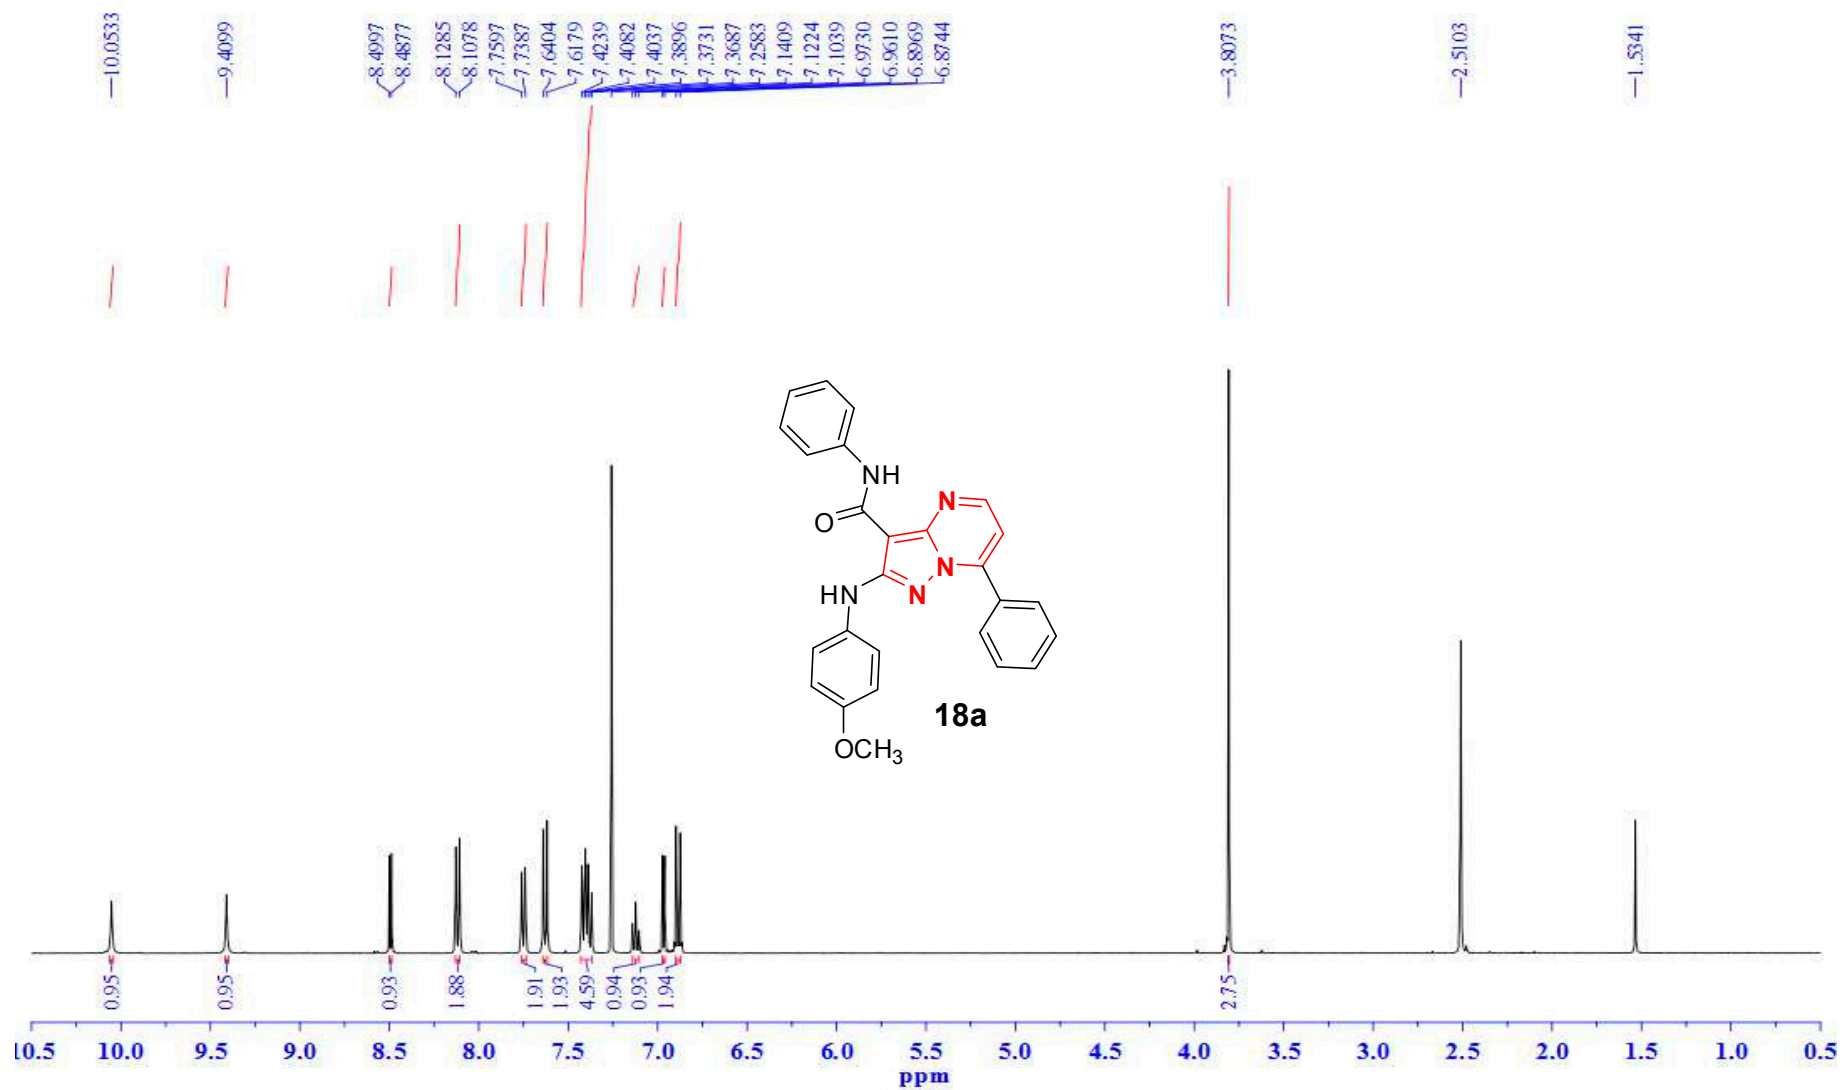

The  $^1\text{H}$  NMR (400 MHz) spectrum of compound **18a**

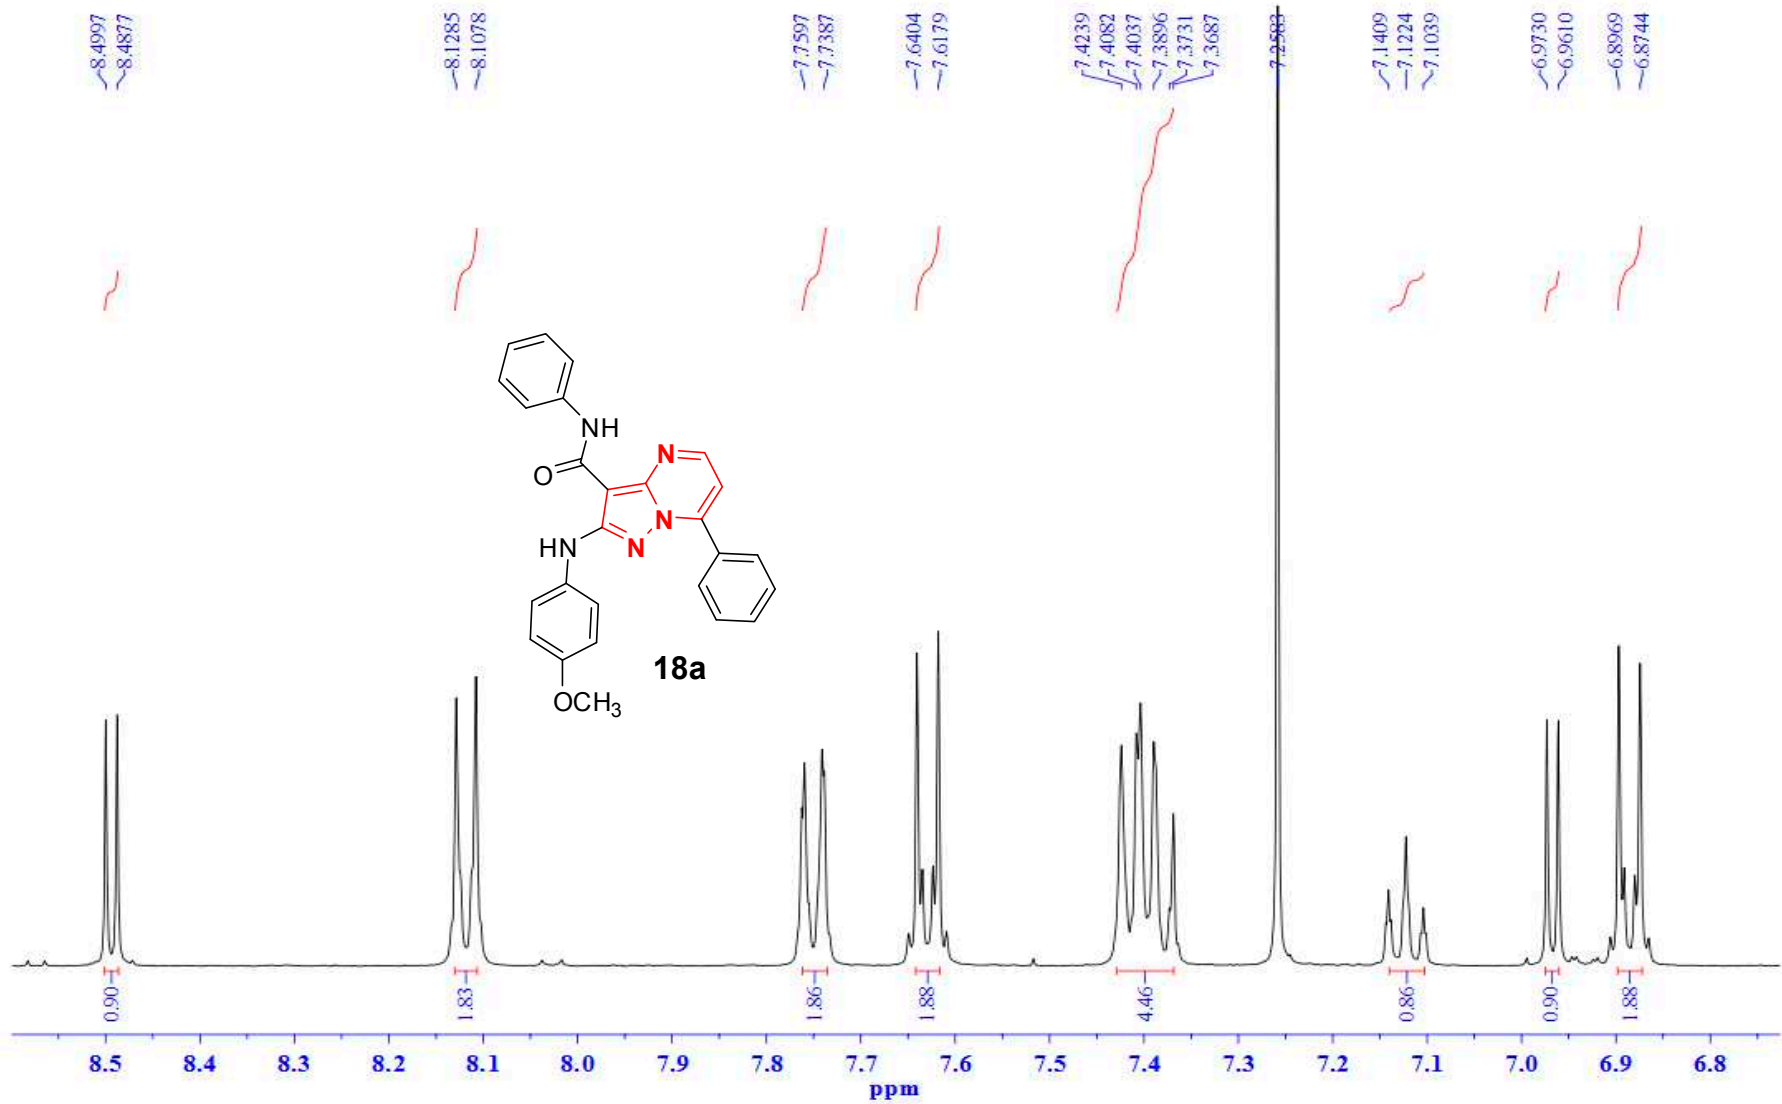

The <sup>1</sup>H NMR (400 MHz) spectrum (aromatic region) of compound **18a**

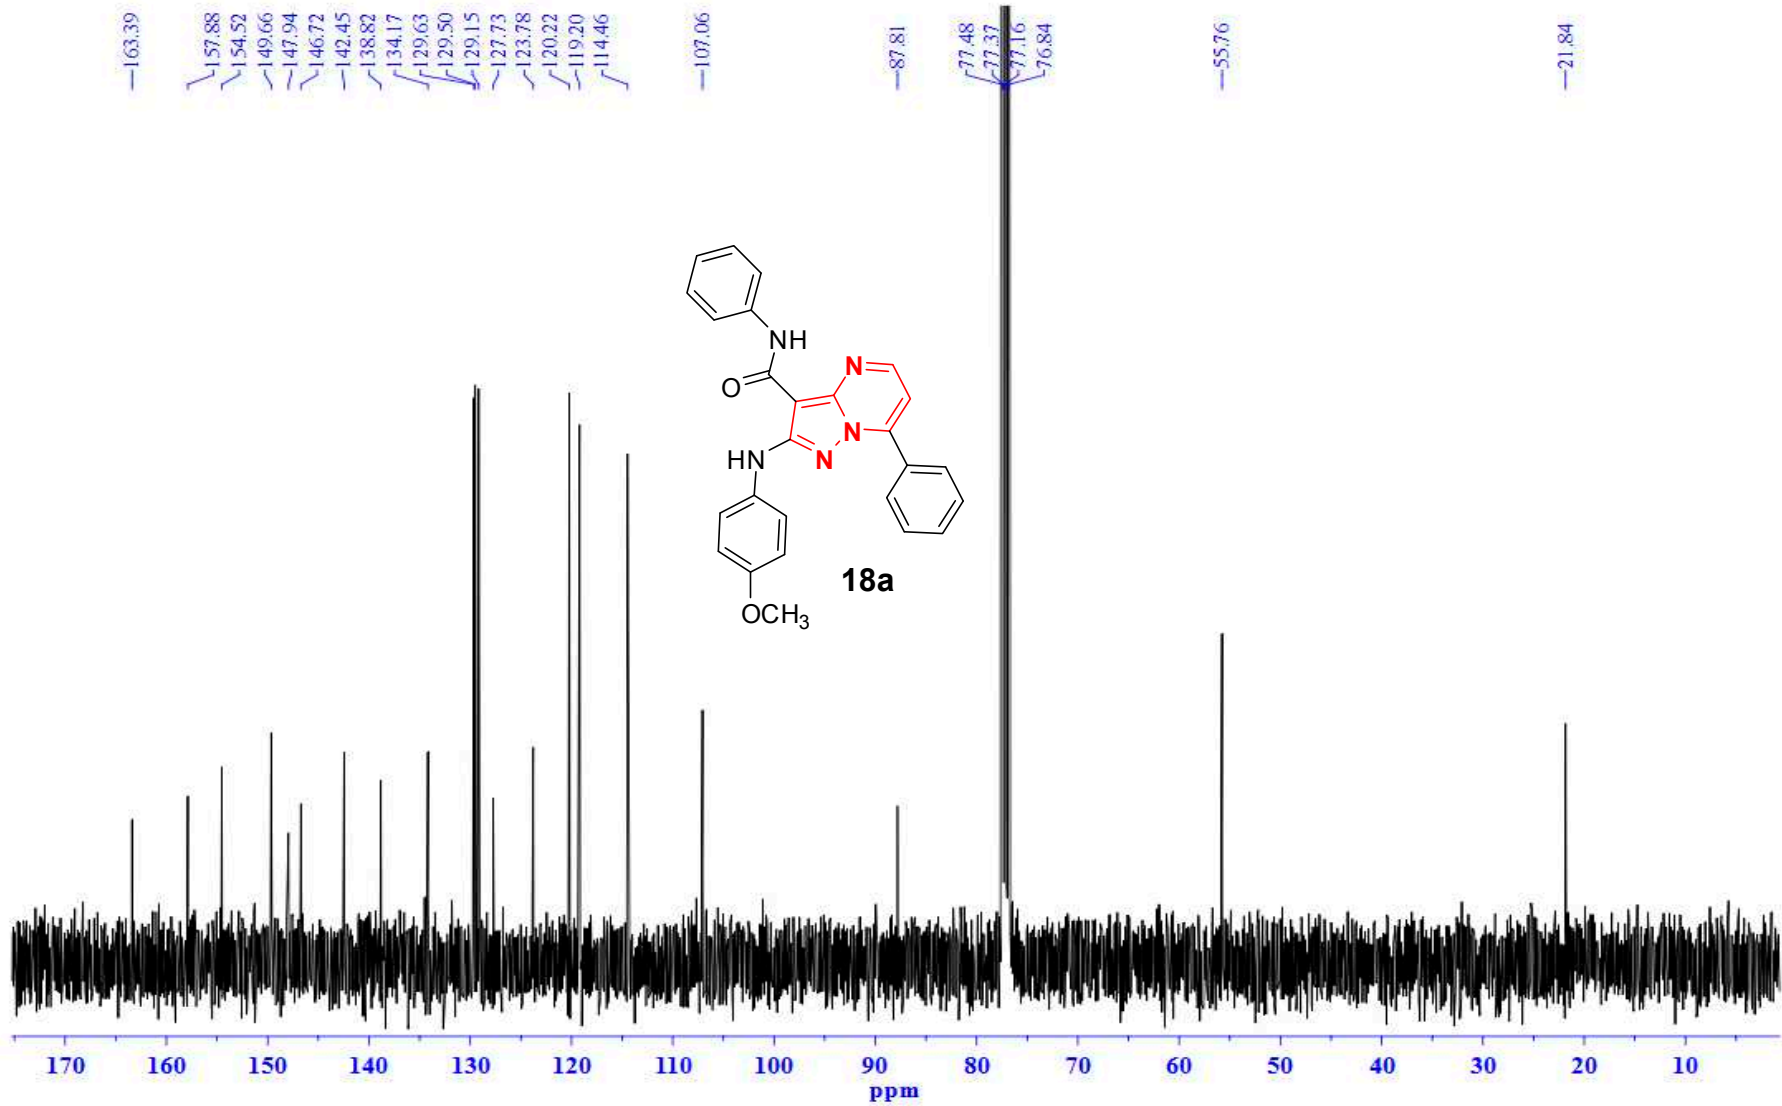

The  $^{13}\text{C}$  NMR (100 MHz) spectrum of compound **18a**

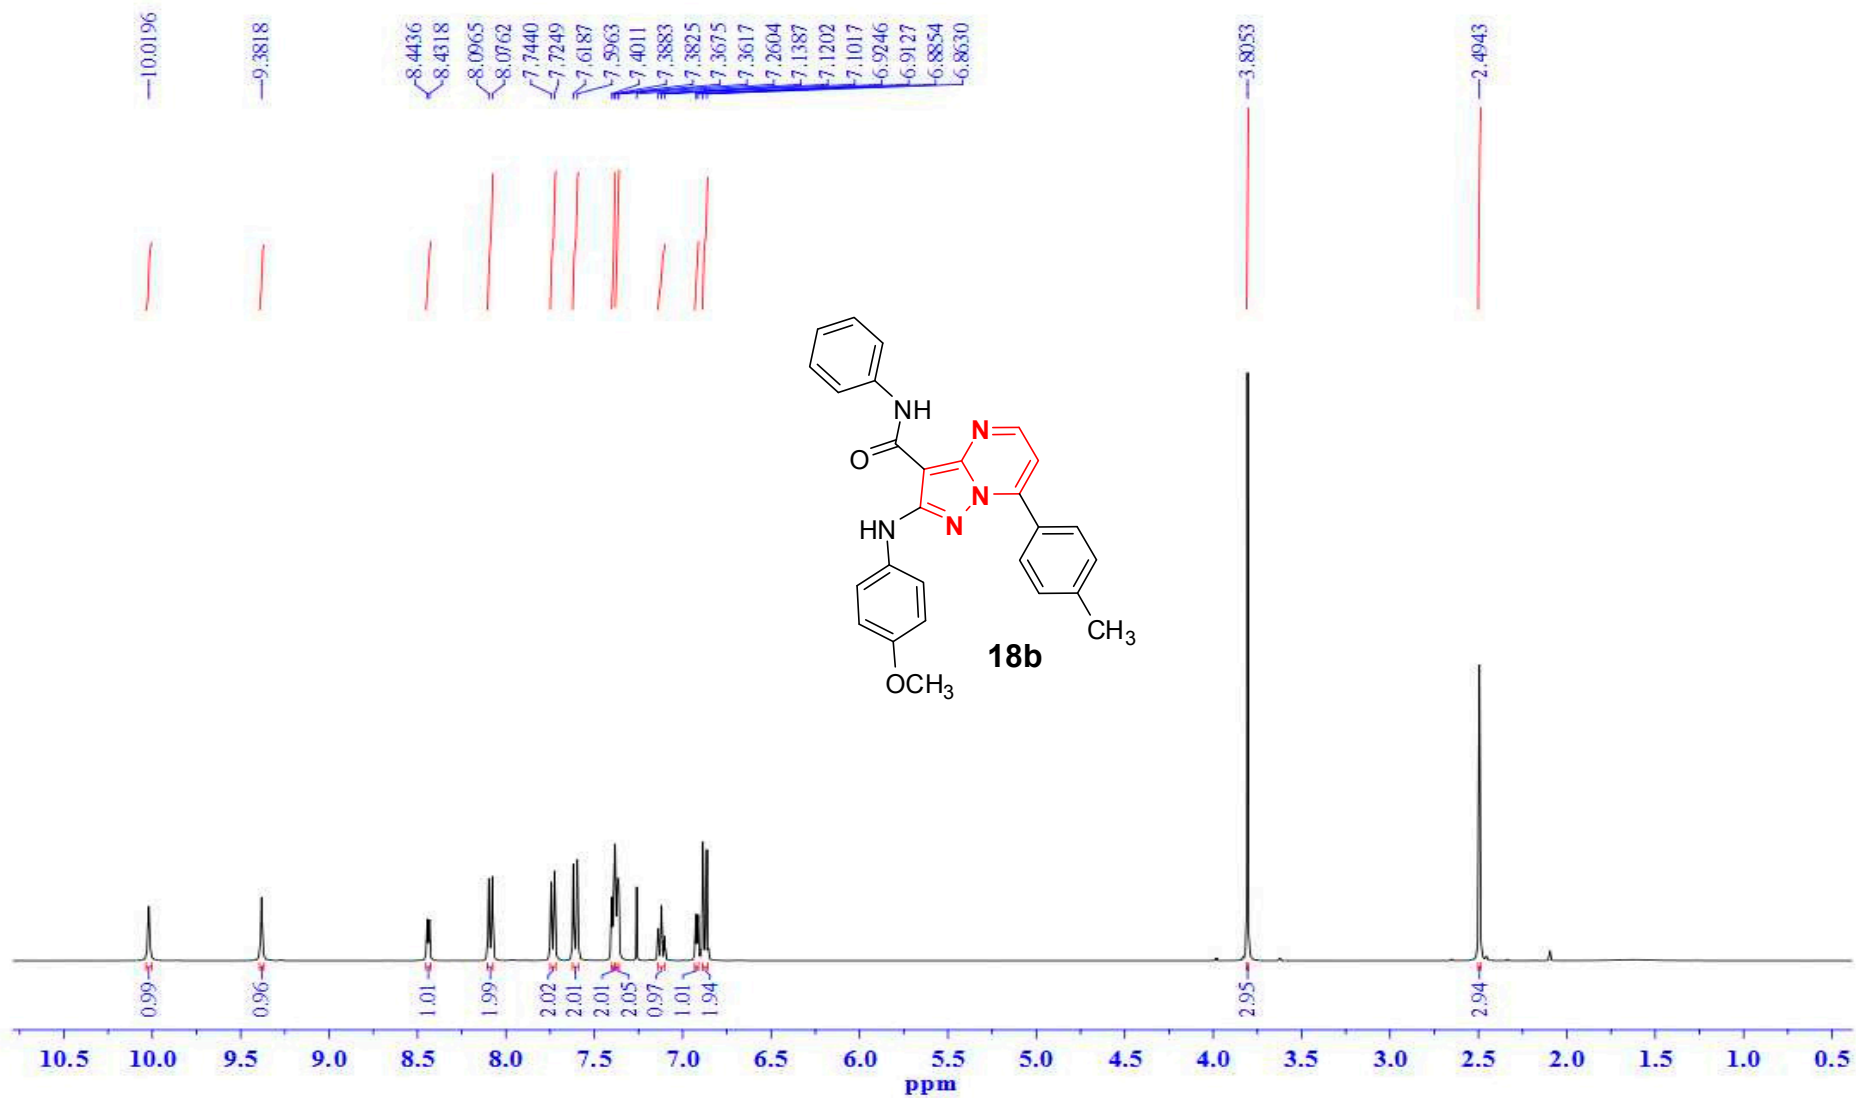

The <sup>1</sup>H NMR (400 MHz) spectrum of compound **18b**

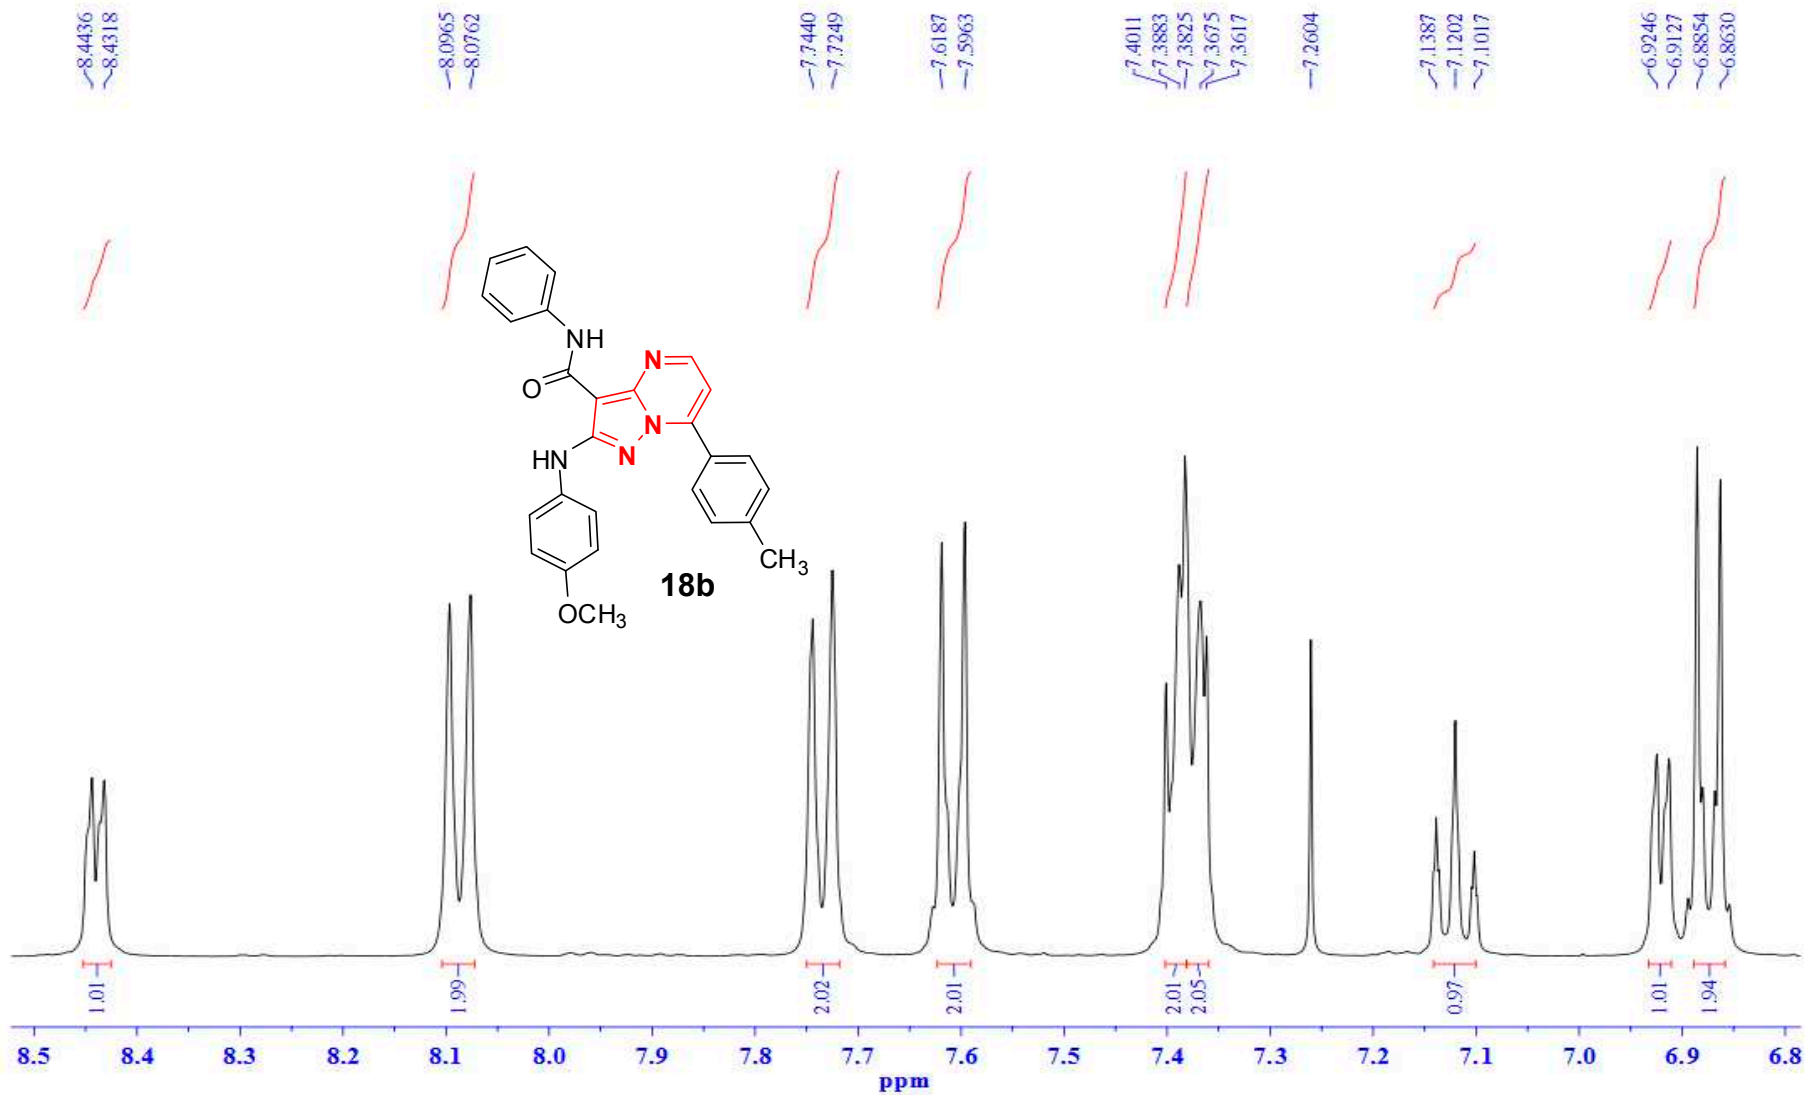

The <sup>1</sup>H NMR (400 MHz) spectrum (aromatic region) of compound **18b**

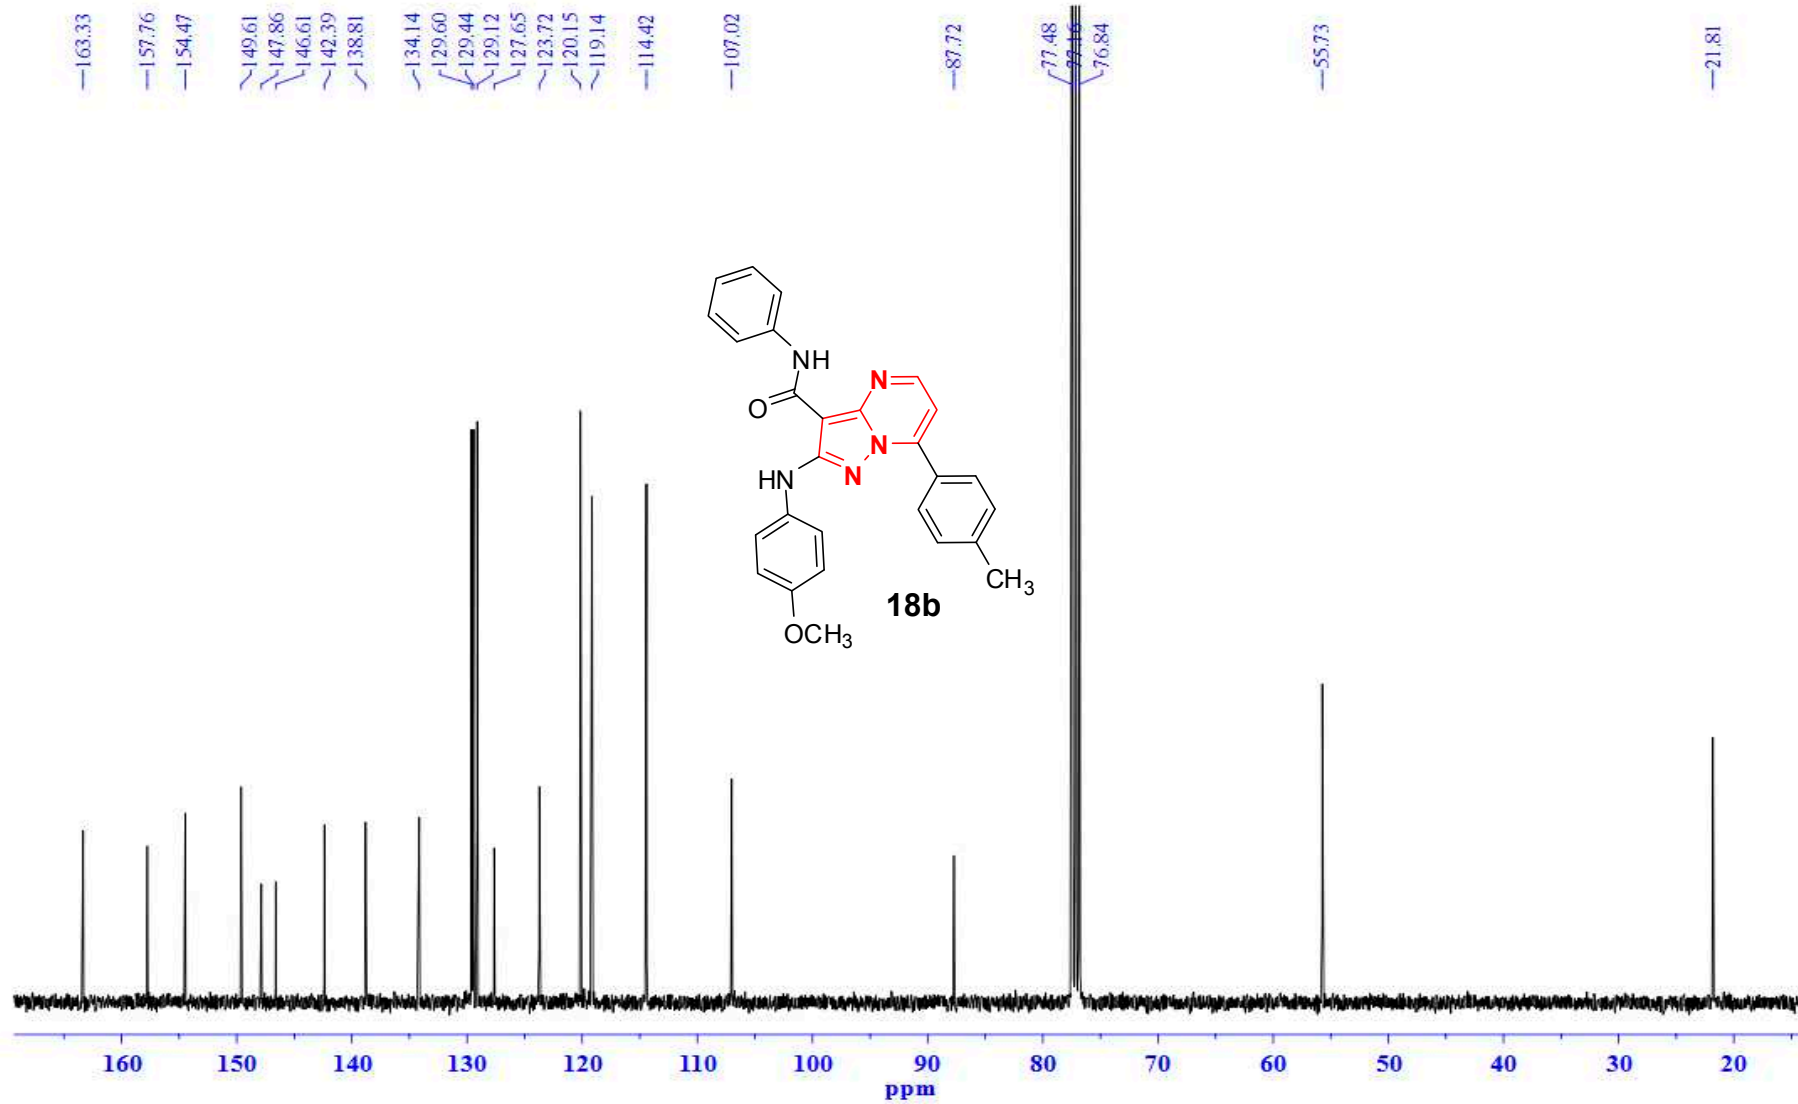

The <sup>13</sup>C NMR (100 MHz) spectrum of compound **18b**

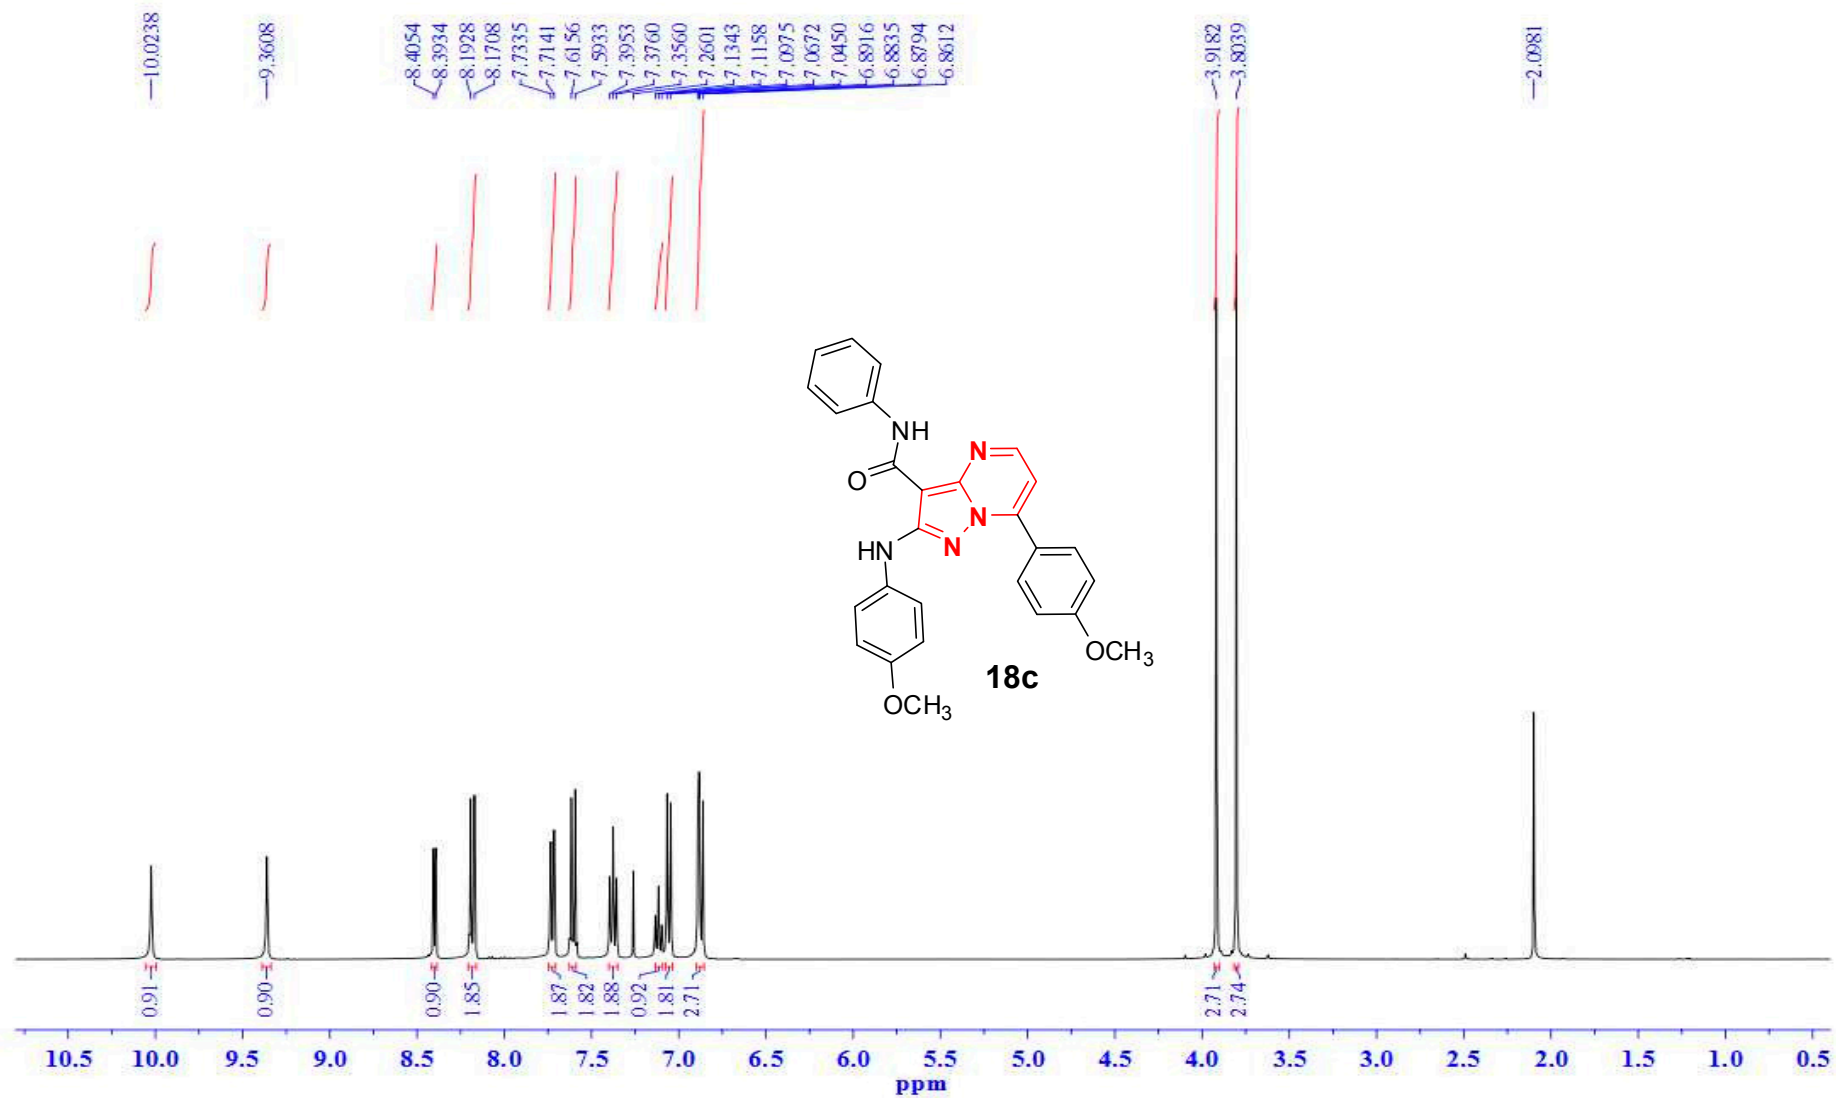

The <sup>1</sup>H NMR (400 MHz) spectrum of compound **18c**



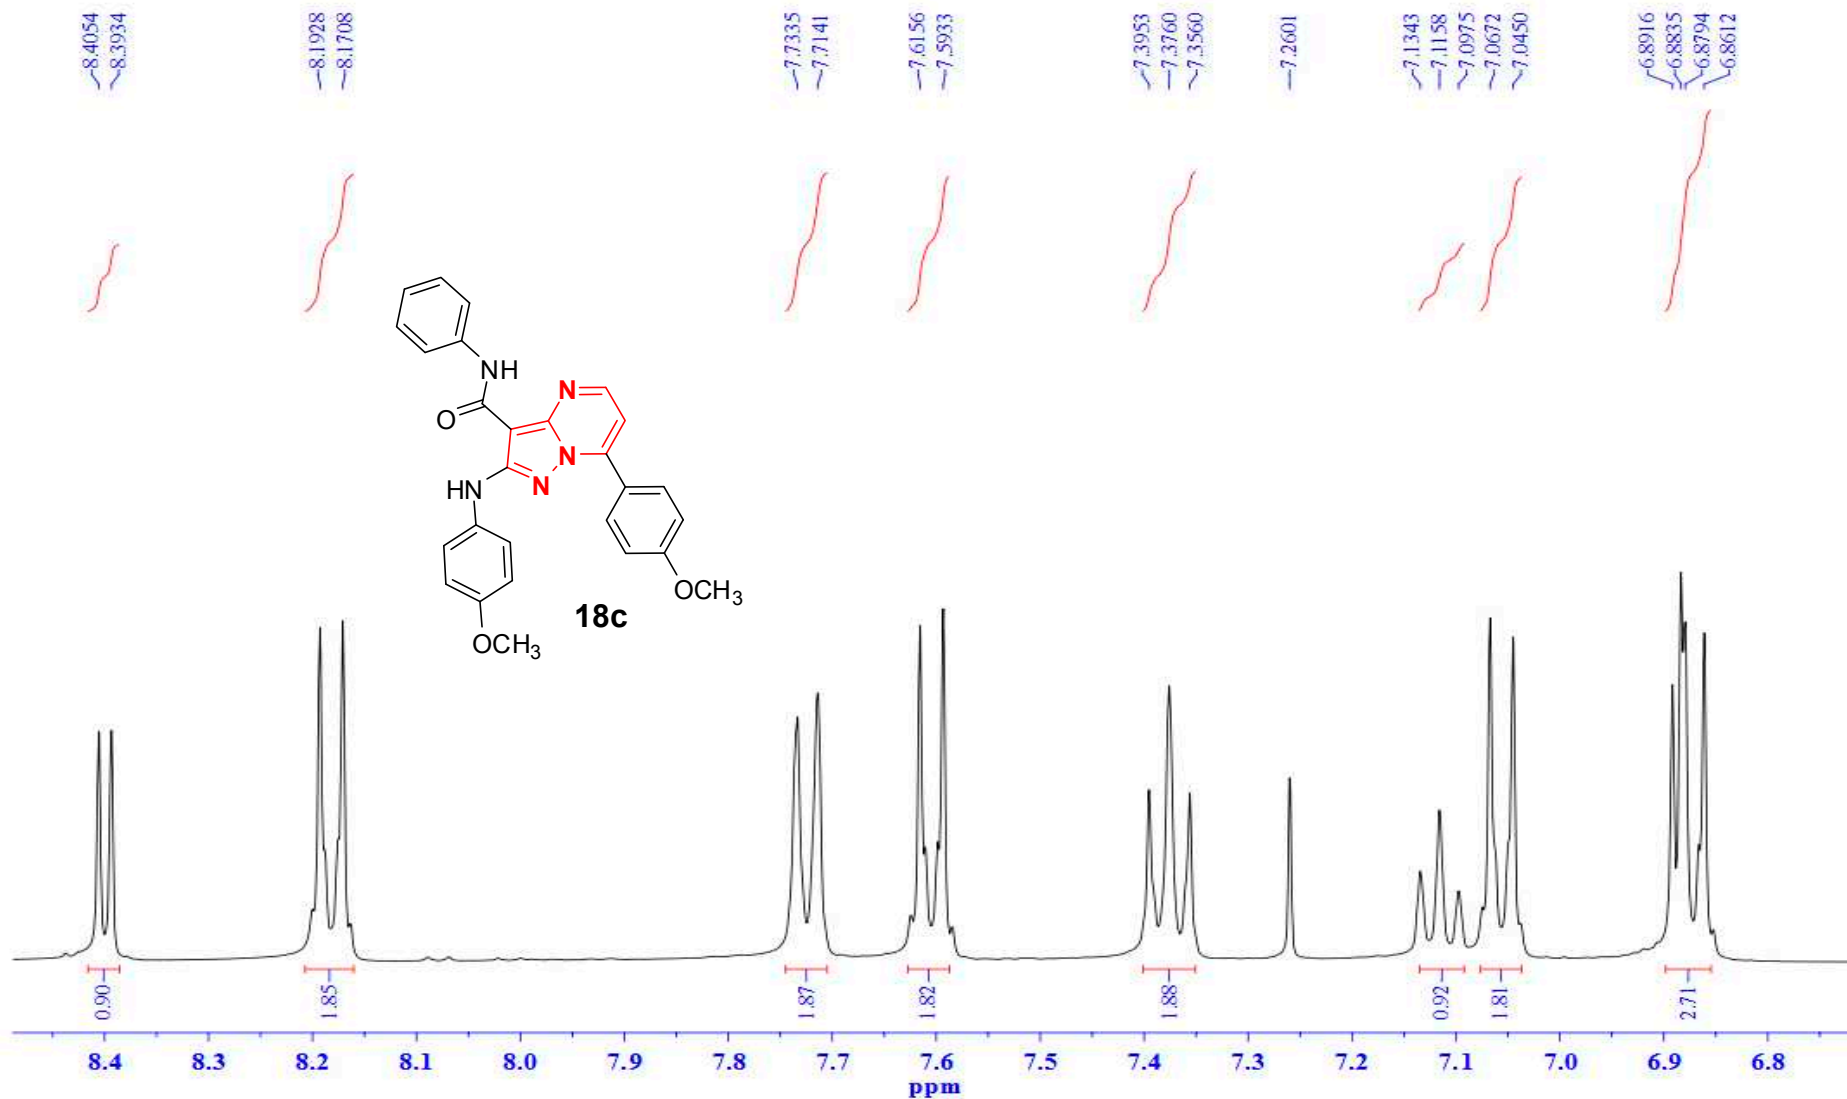

The <sup>1</sup>H NMR (400 MHz) spectrum (aromatic region) of compound **18c**

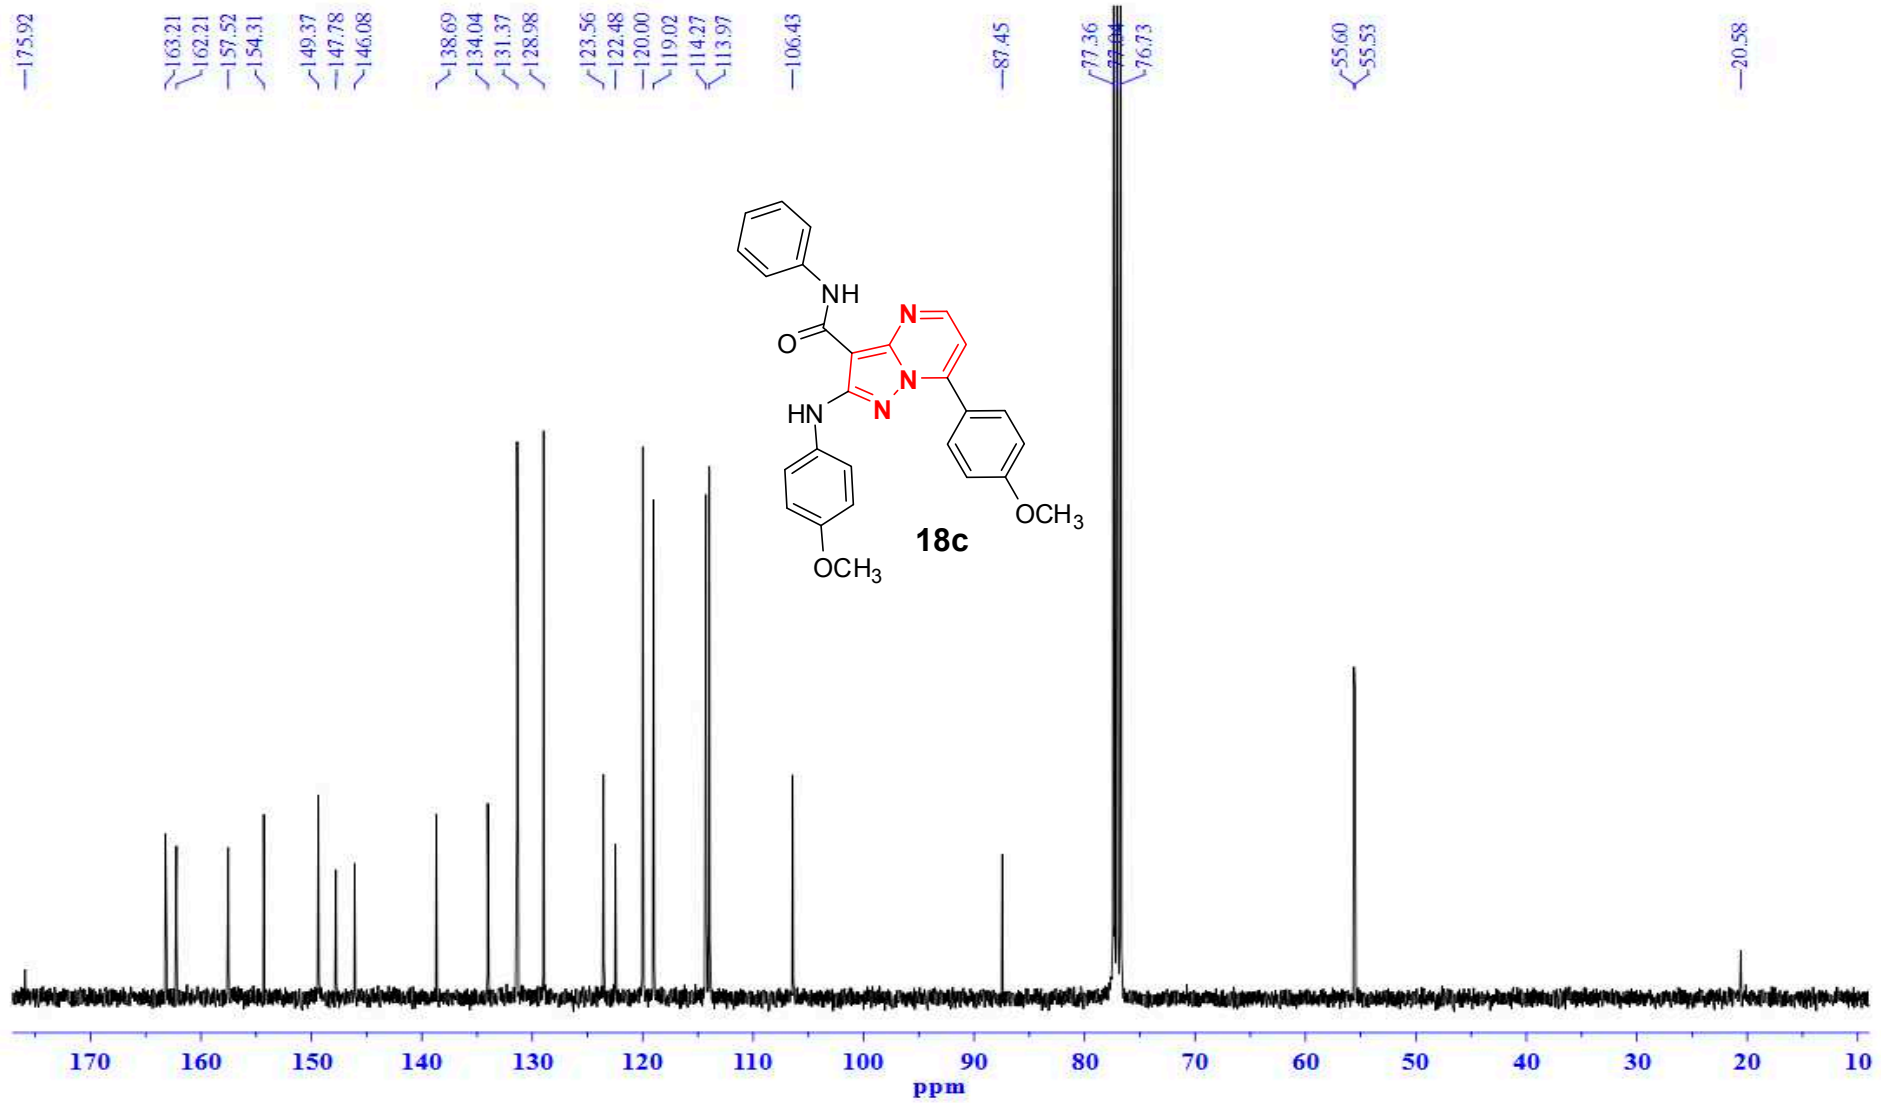

The  $^{13}\text{C}$  NMR (100 MHz) spectrum of compound **18c**

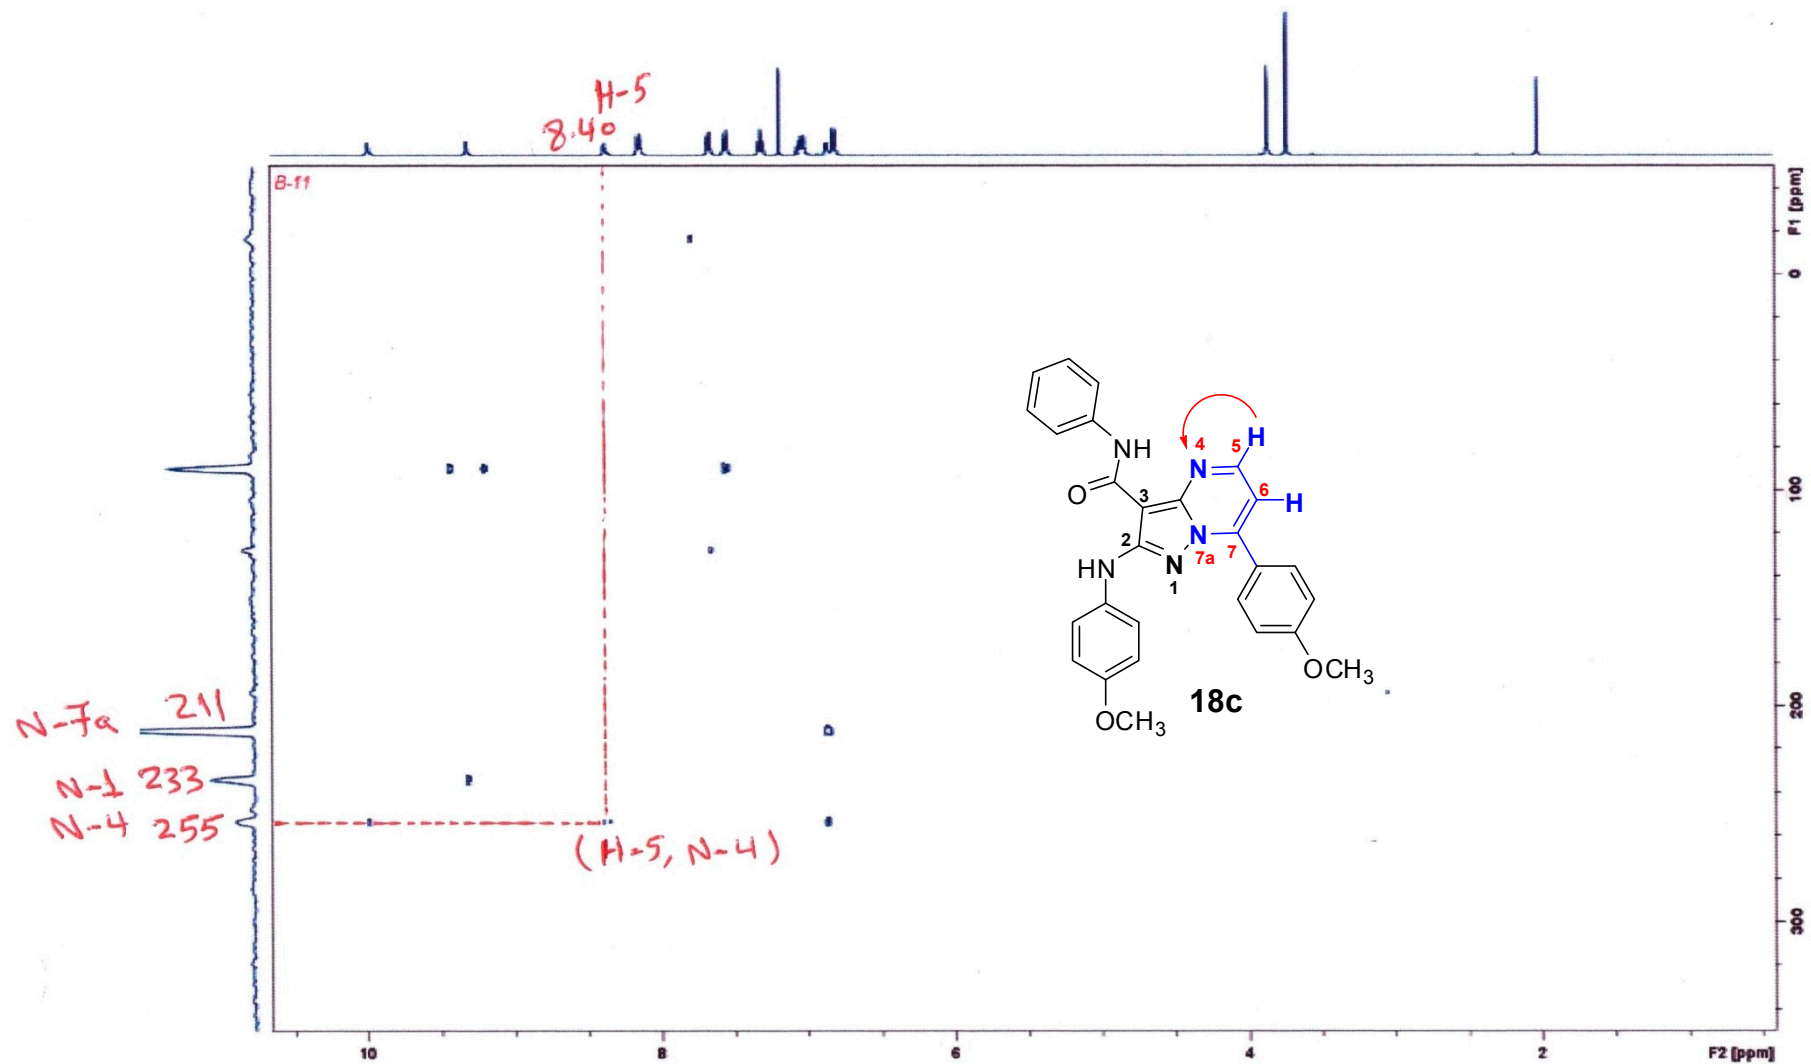

The  $^1\text{H}$ - $^{15}\text{N}$  HMBC (40 MHz) spectrum of compound **18c**

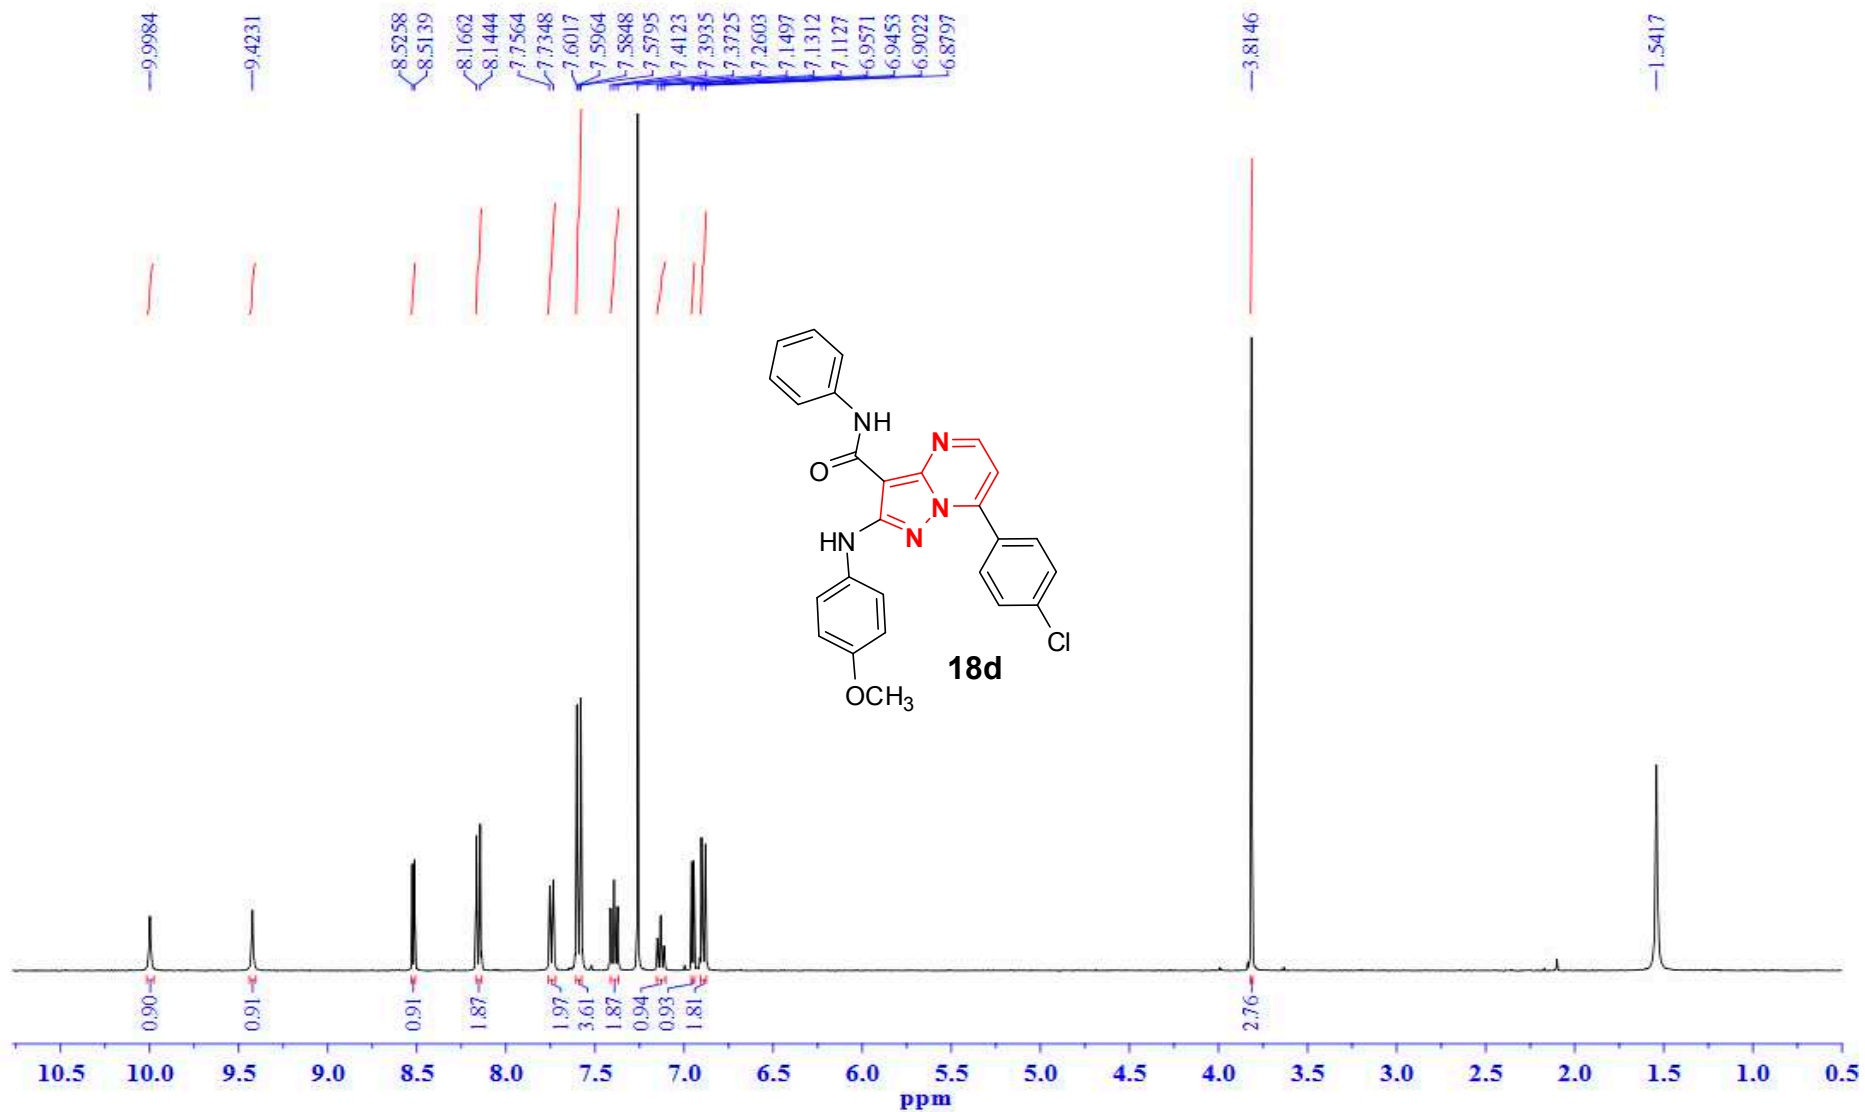

The <sup>1</sup>H NMR (400 MHz) spectrum of compound **18d**

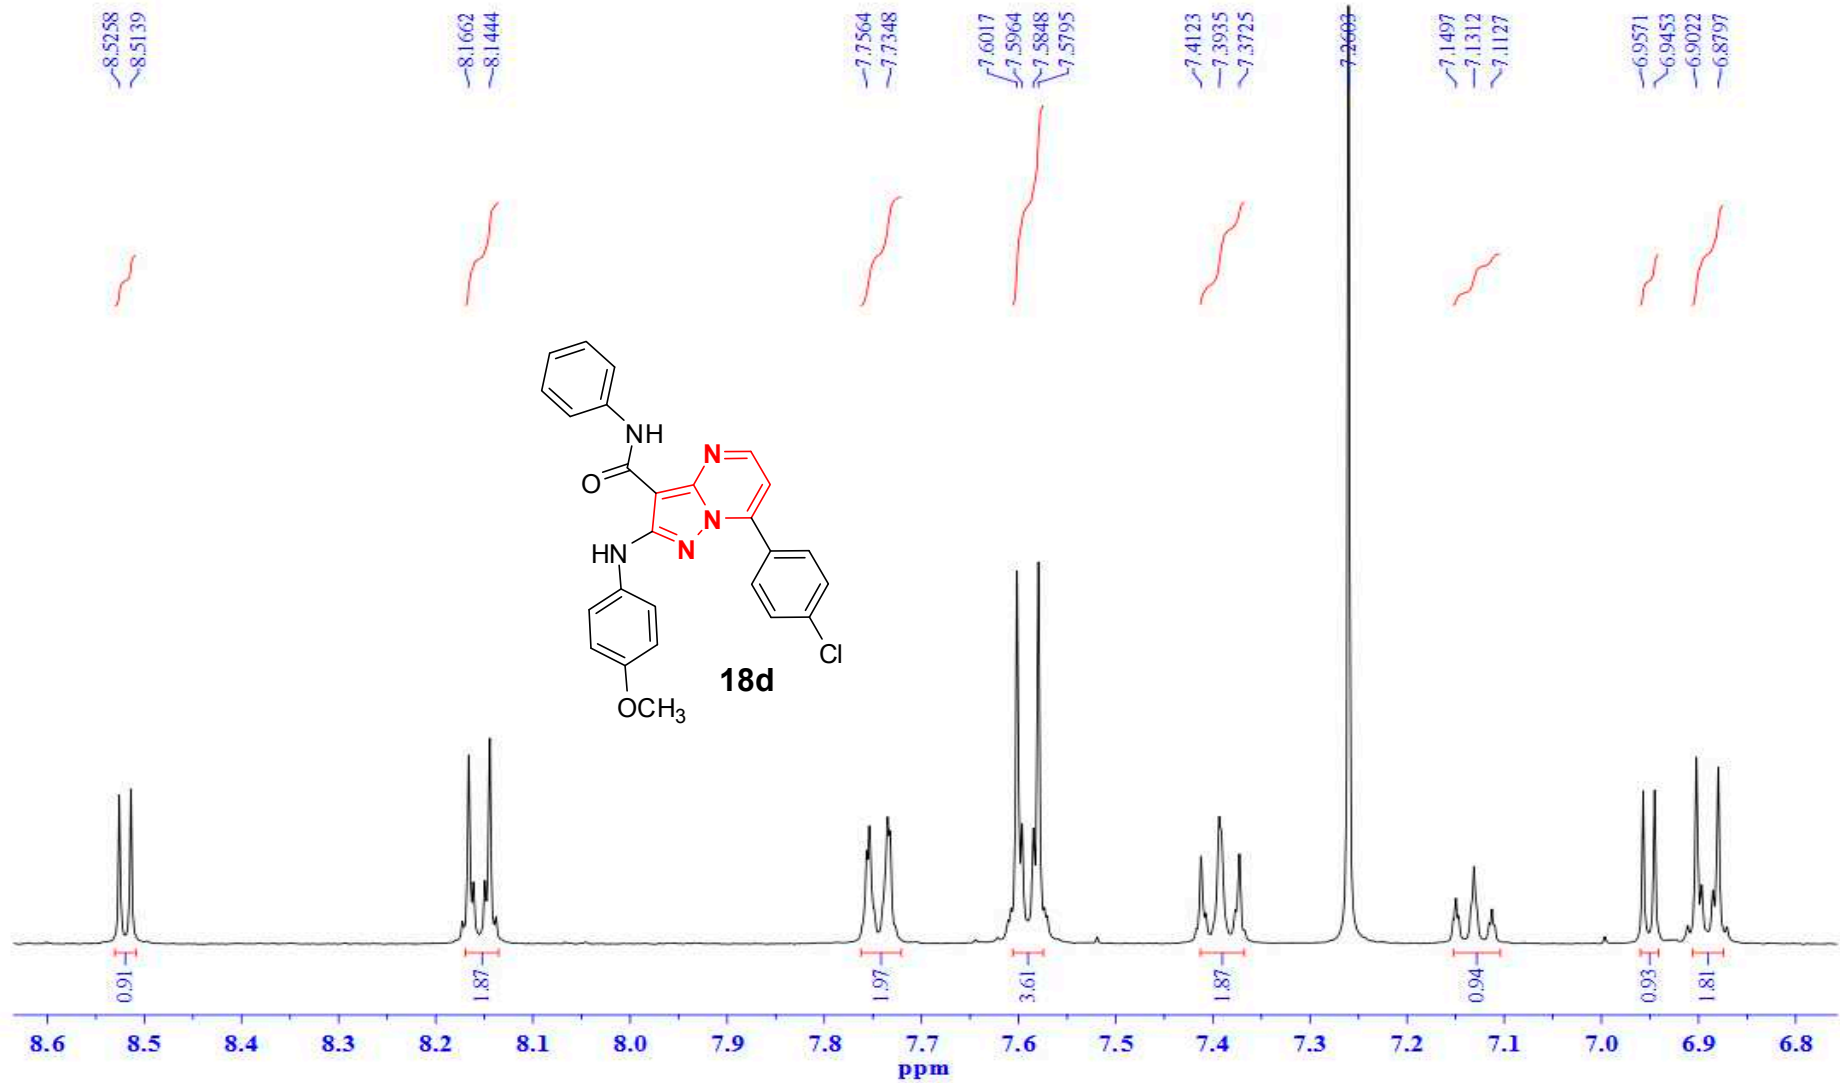

The  $^1\text{H}$  NMR (400 MHz) spectrum (aromatic region) of compound **18d**

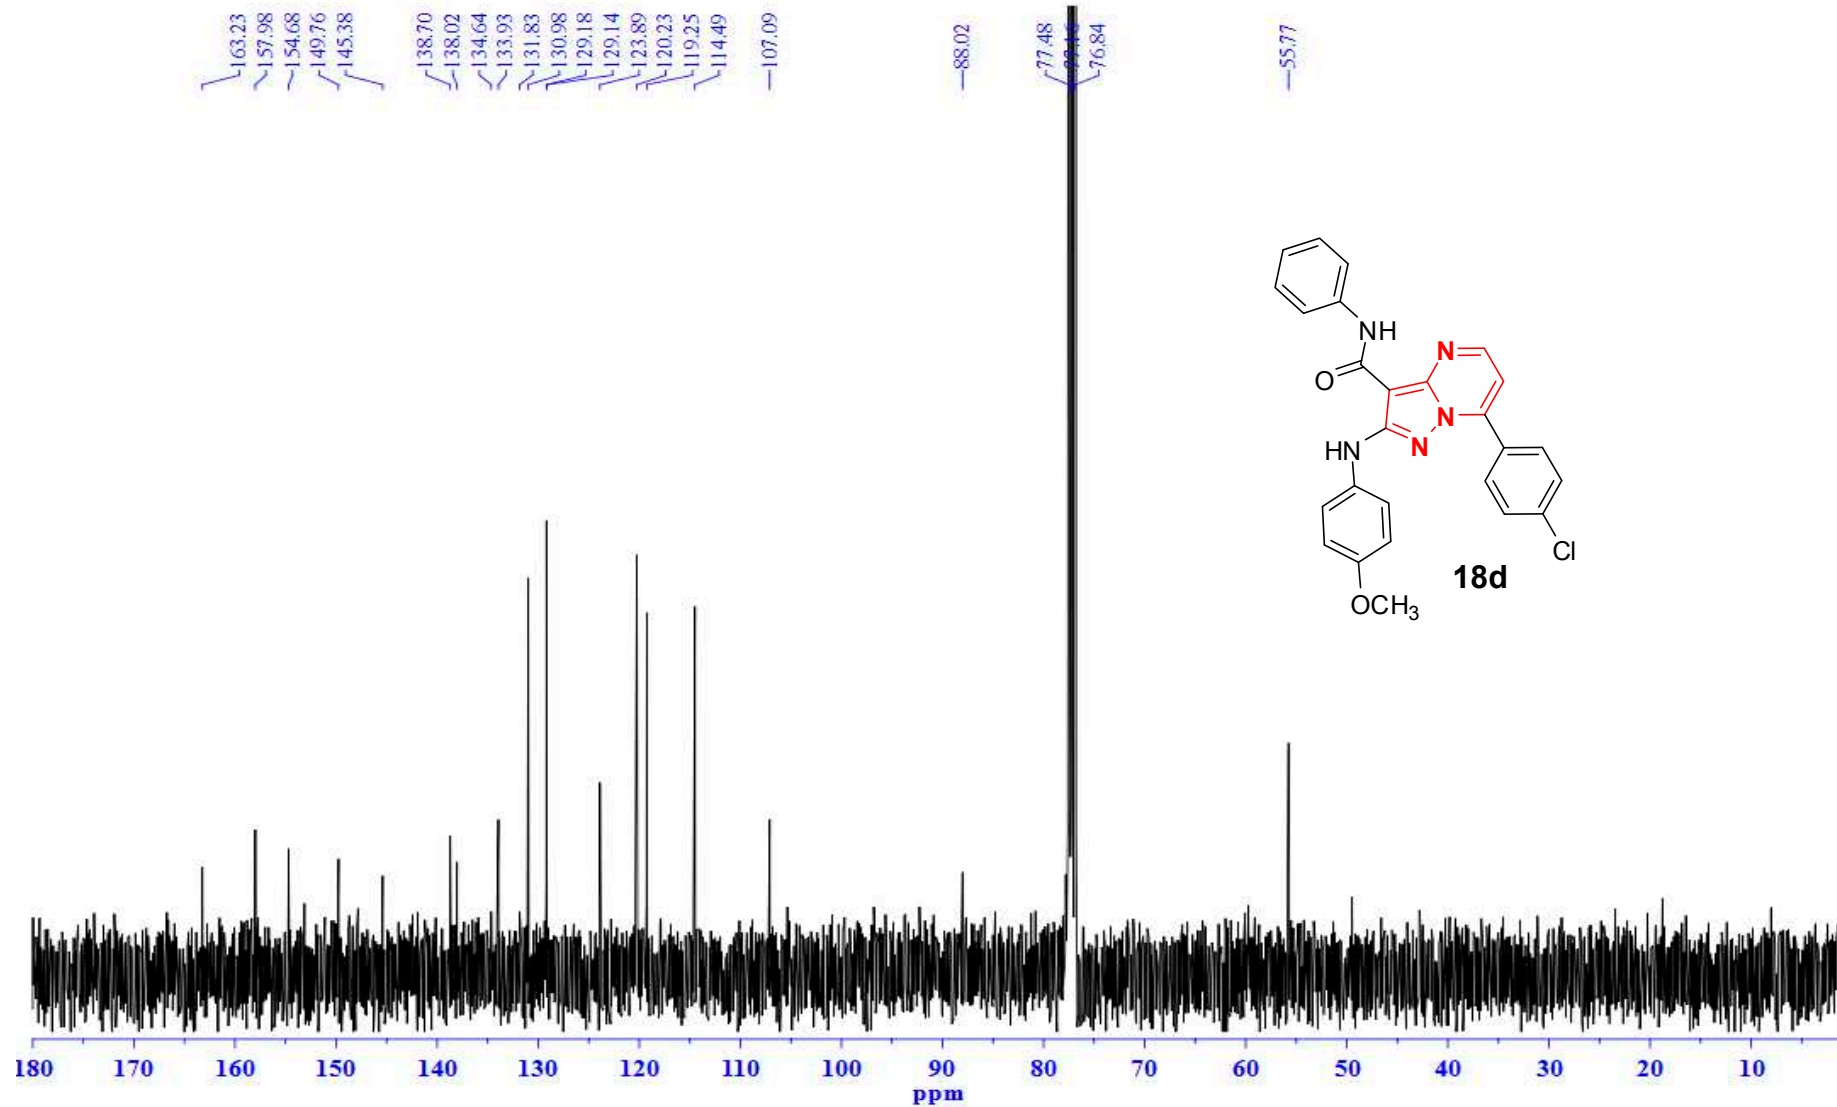

The  $^{13}\text{C}$  NMR (100 MHz) spectrum of compound **18d**

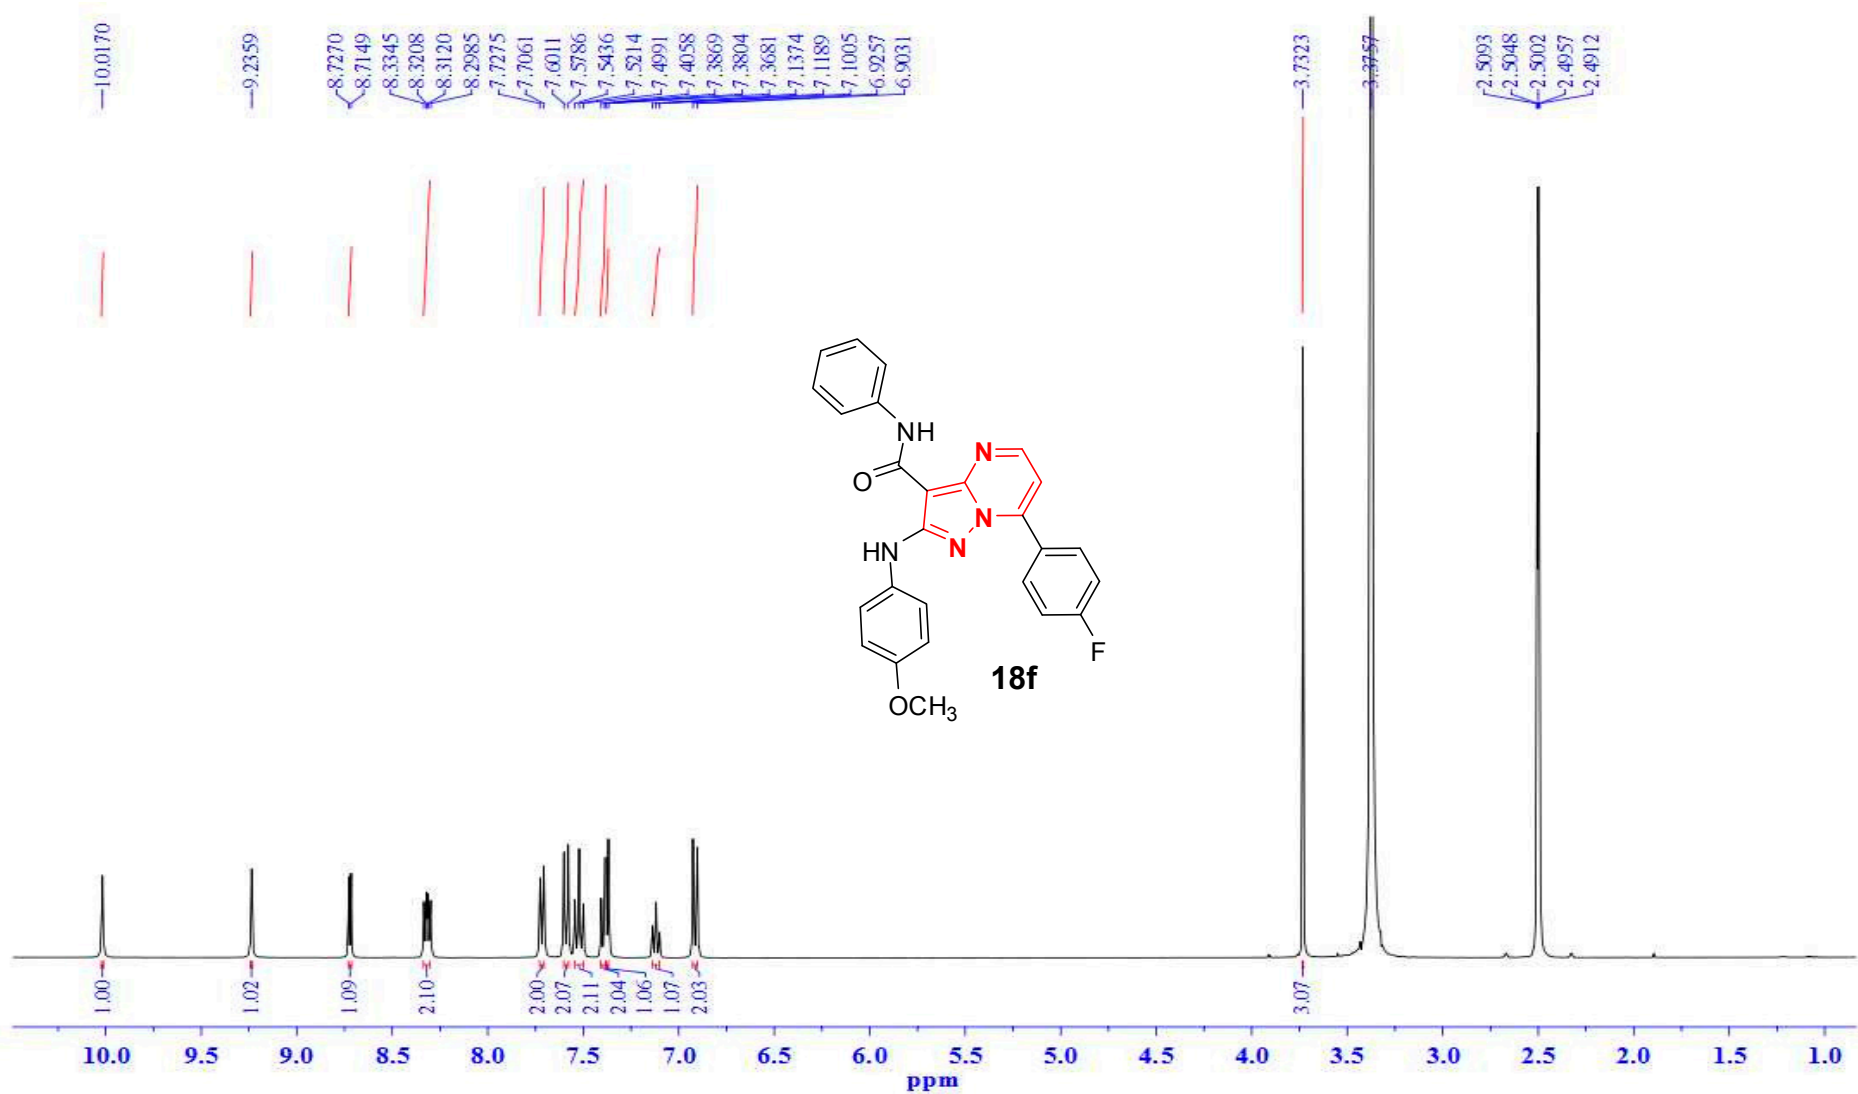

The  $^1\text{H}$  NMR (400 MHz) spectrum of compound **18f**

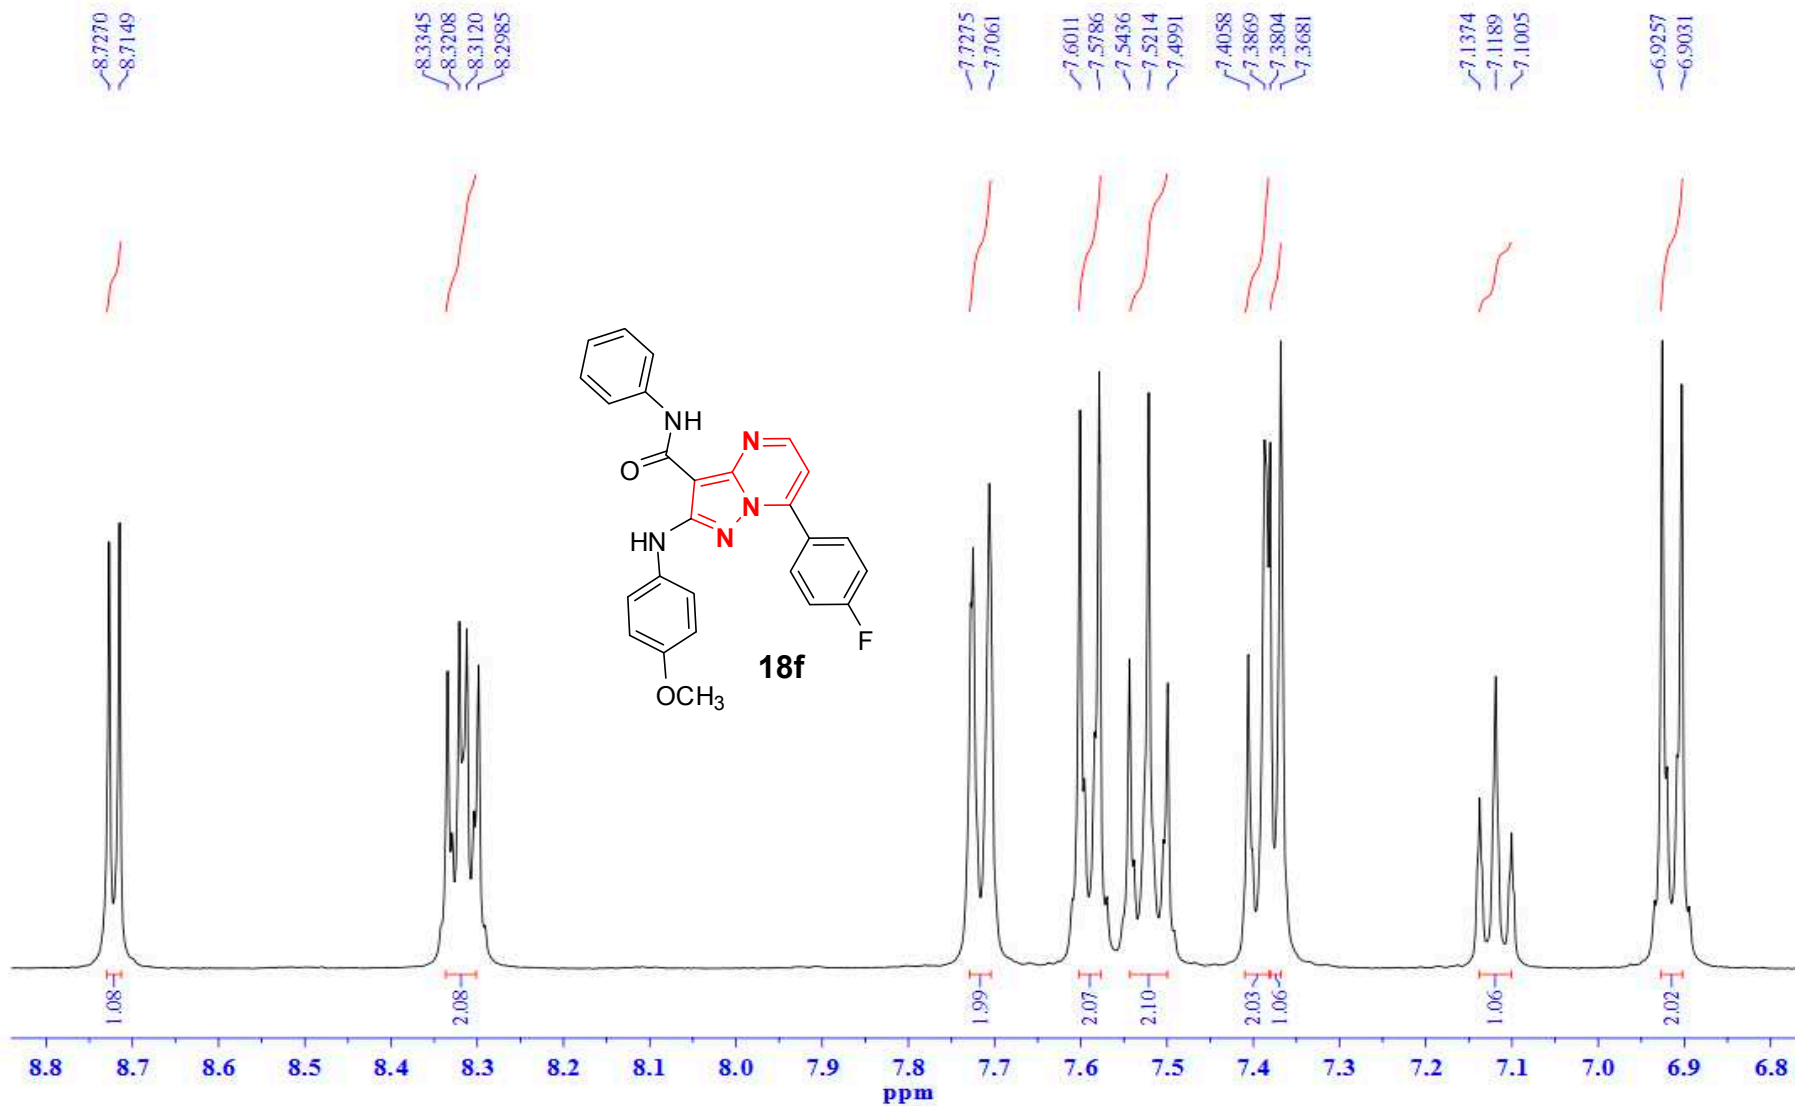

The <sup>1</sup>H NMR (400 MHz) spectrum (aromatic region) of compound **18f**



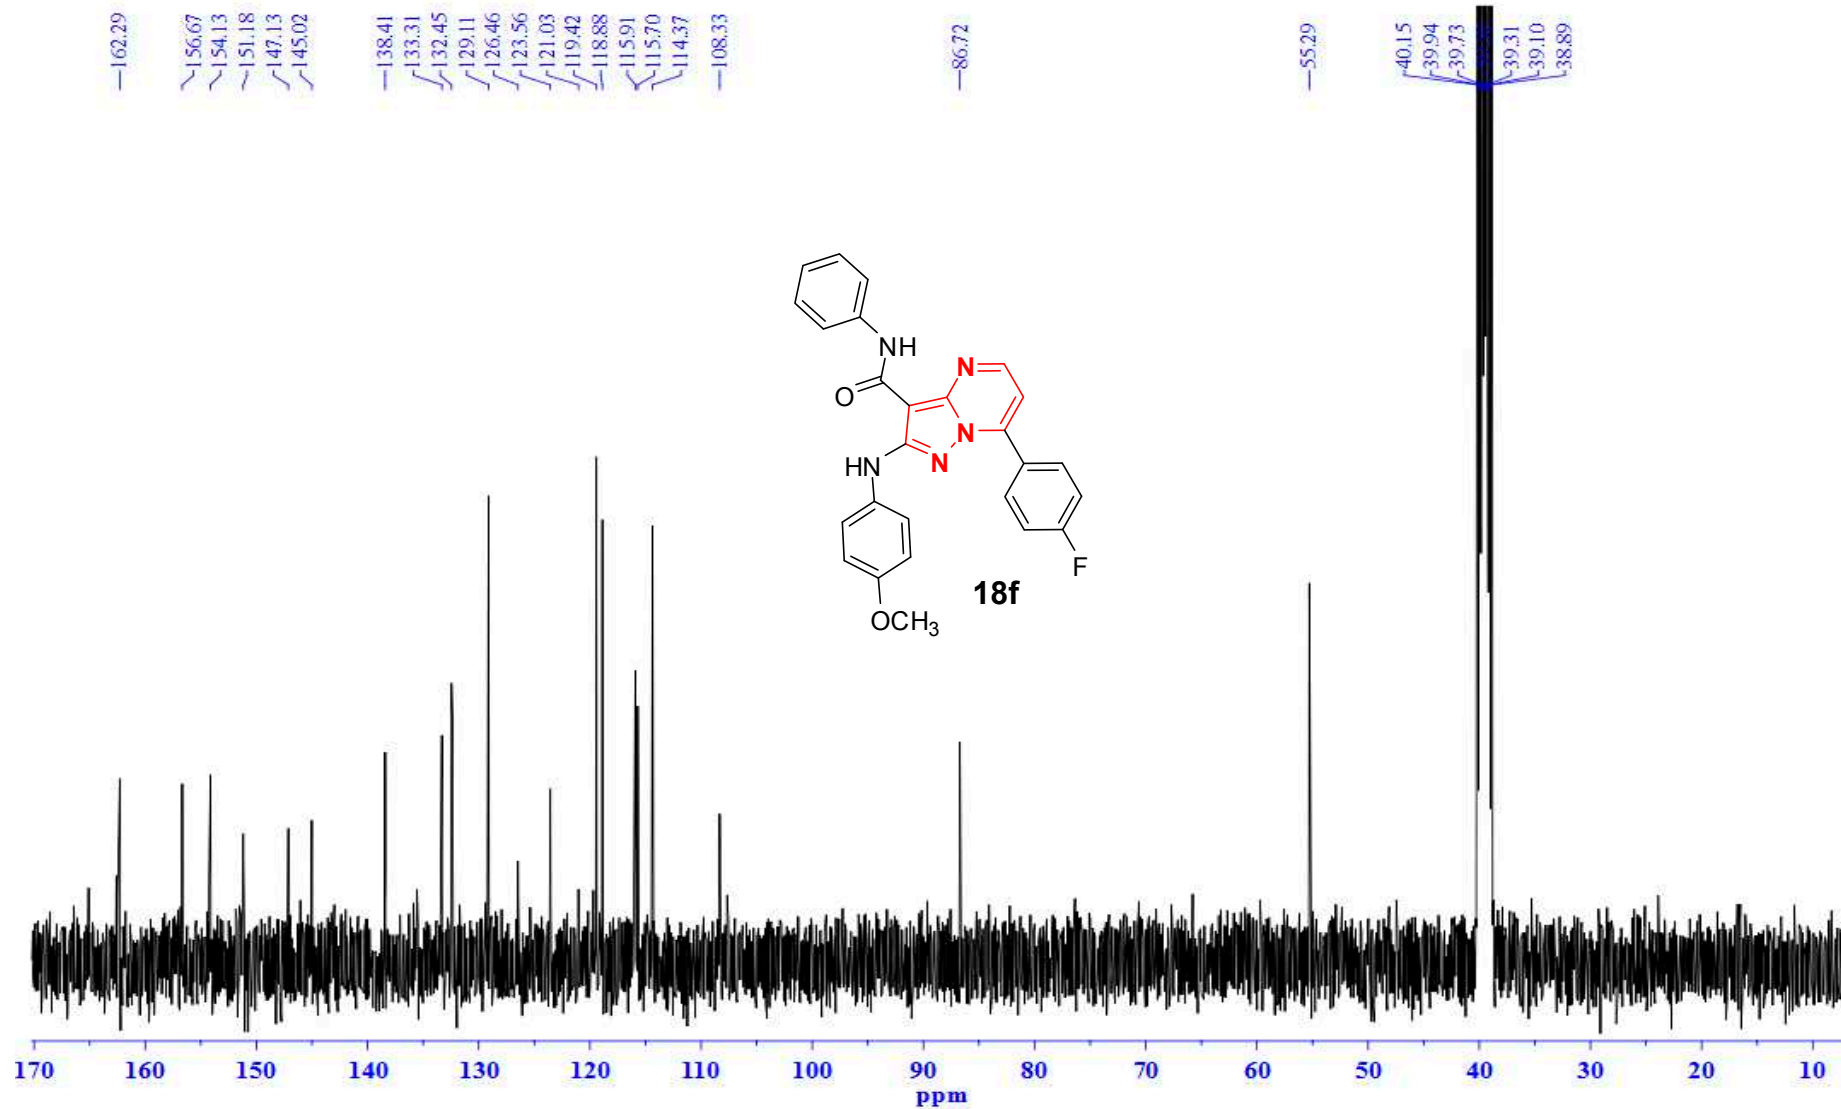

The  $^{13}\text{C}$  NMR (100 MHz) spectrum of compound **18f**

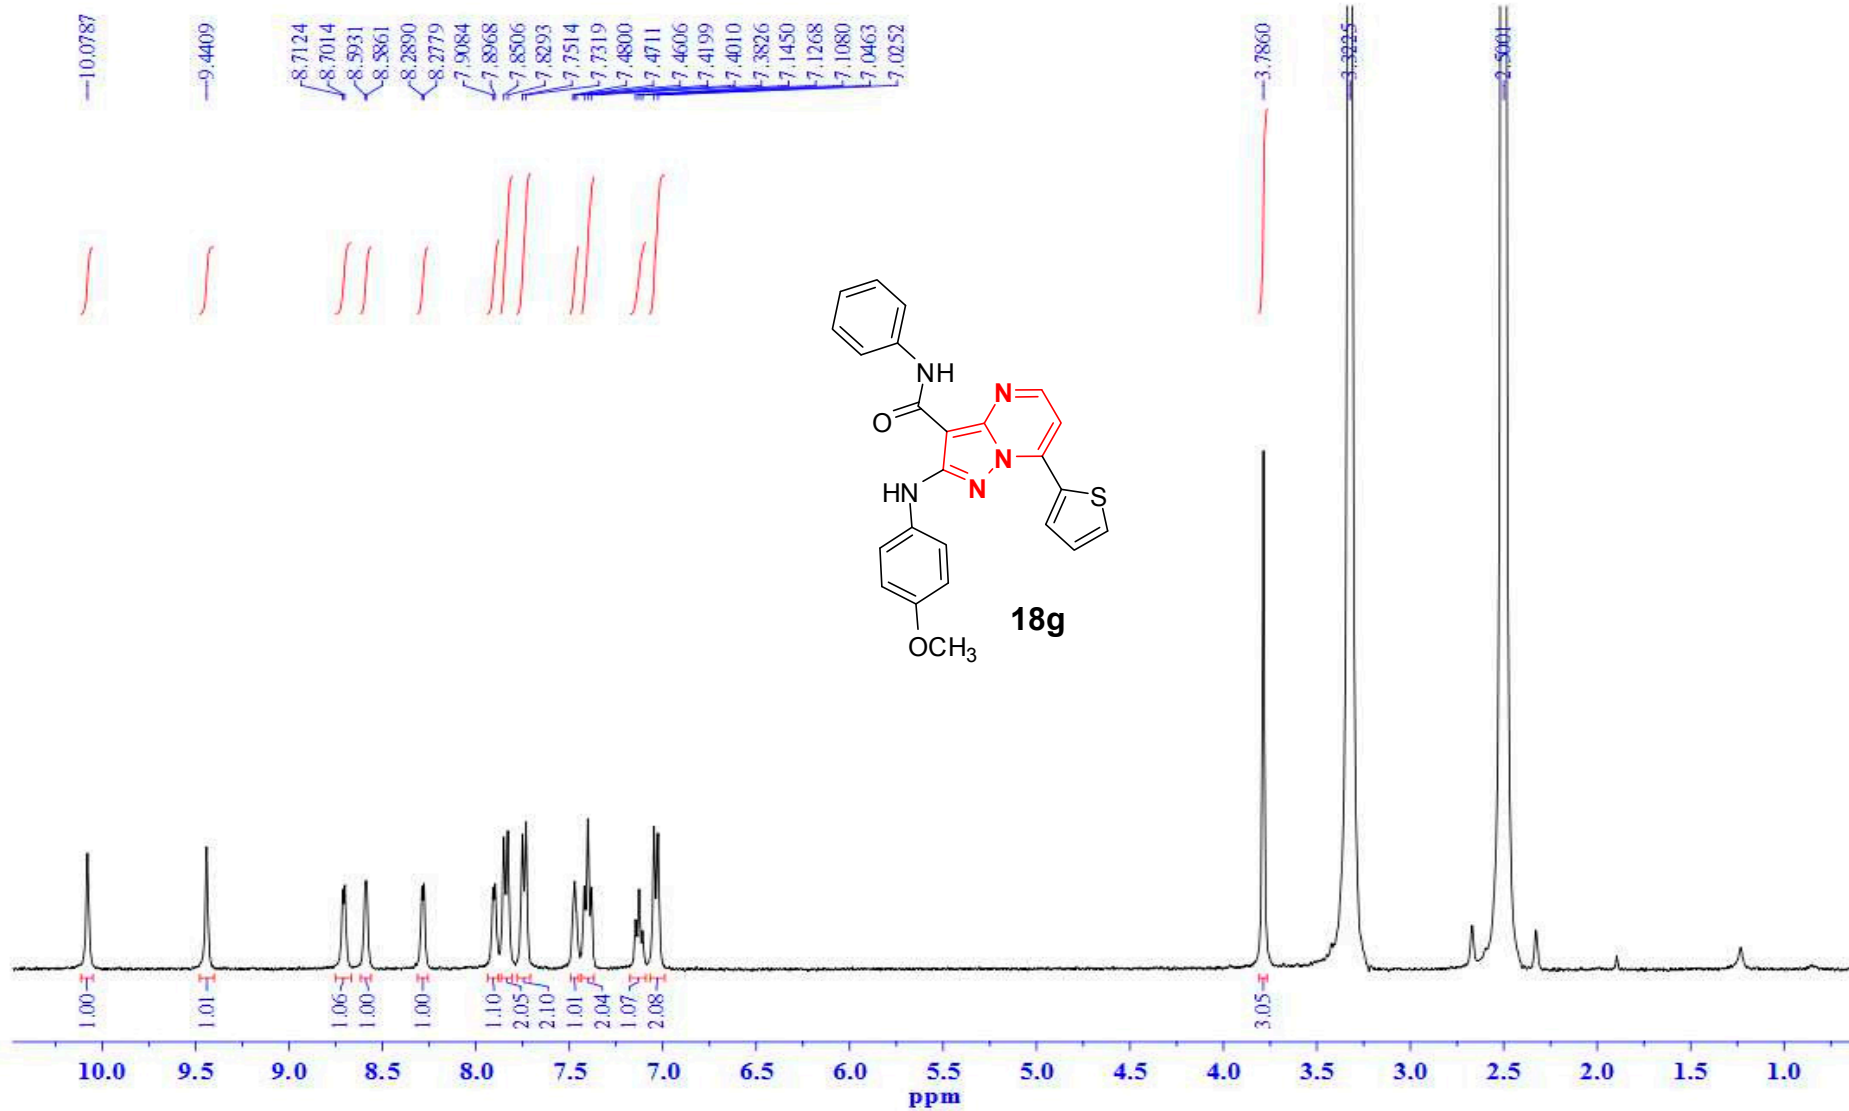

The  $^1\text{H}$  NMR (400 MHz) spectrum of compound **18g**

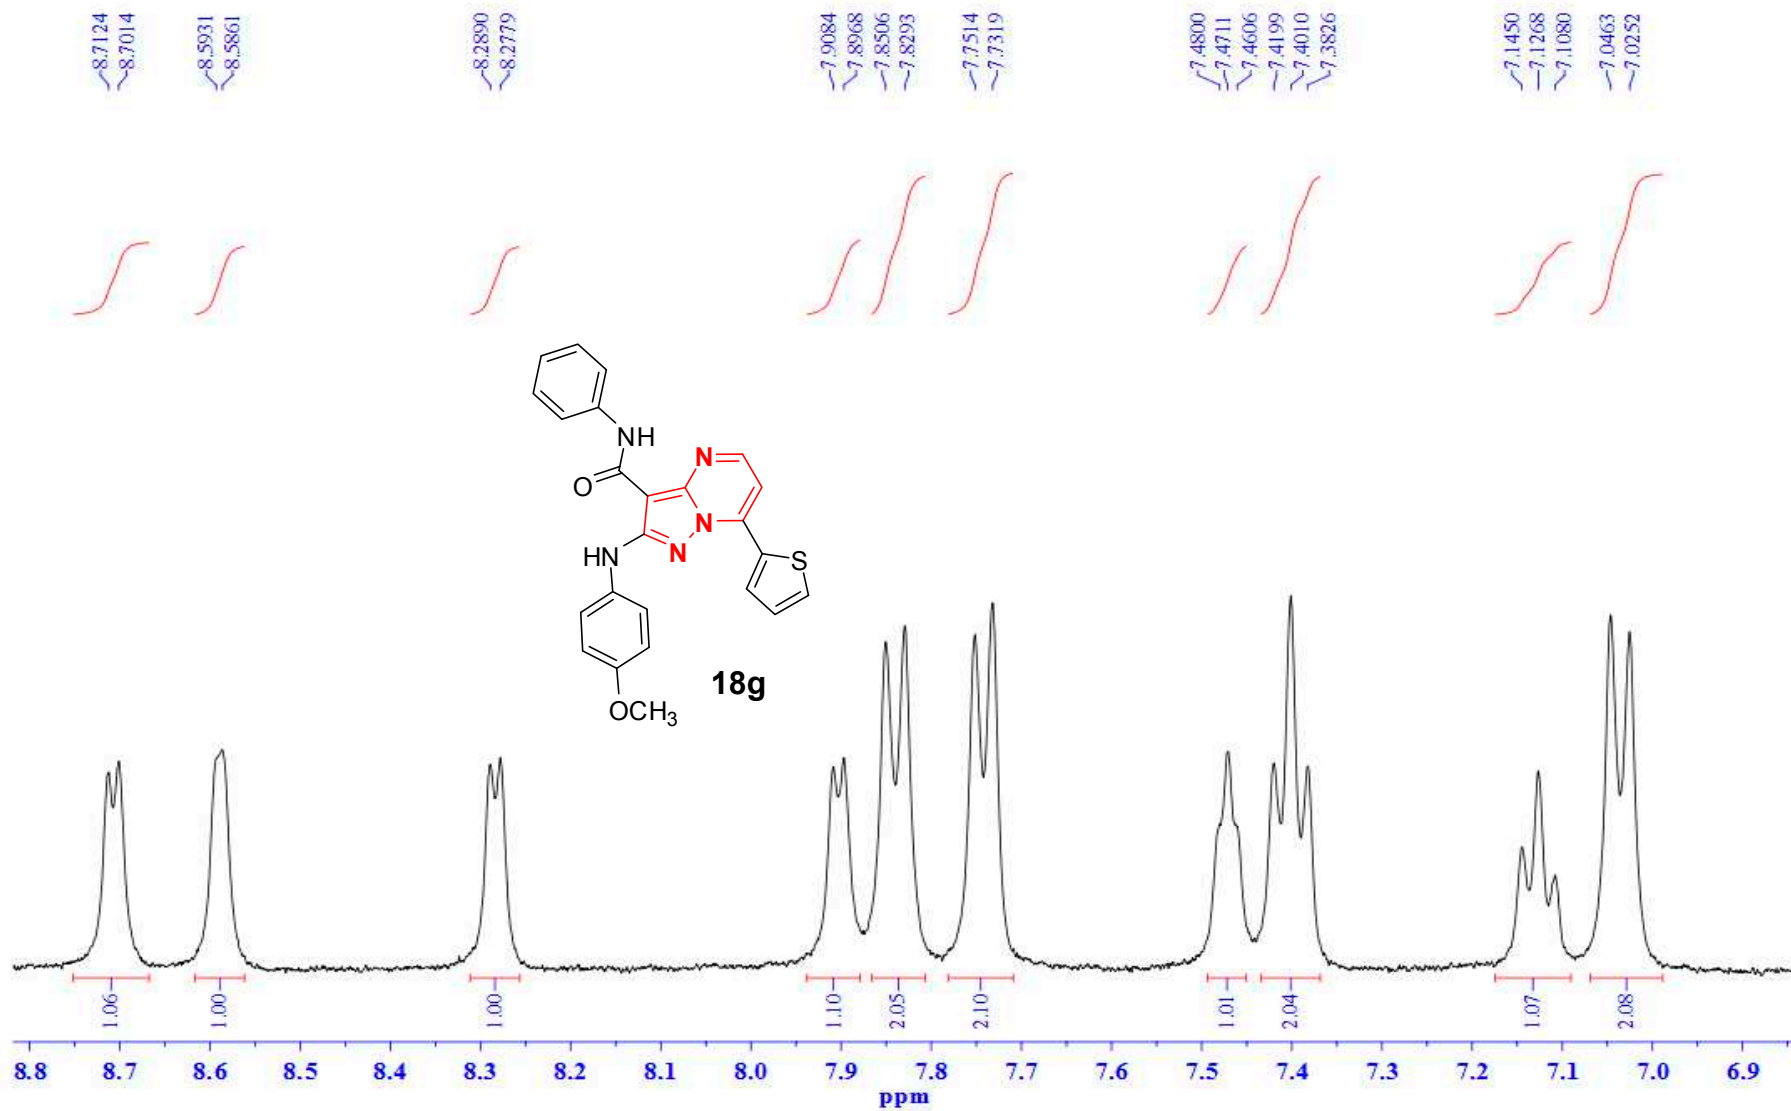

The  $^1\text{H}$  NMR (400 MHz) spectrum (aromatic region) of compound **18g**

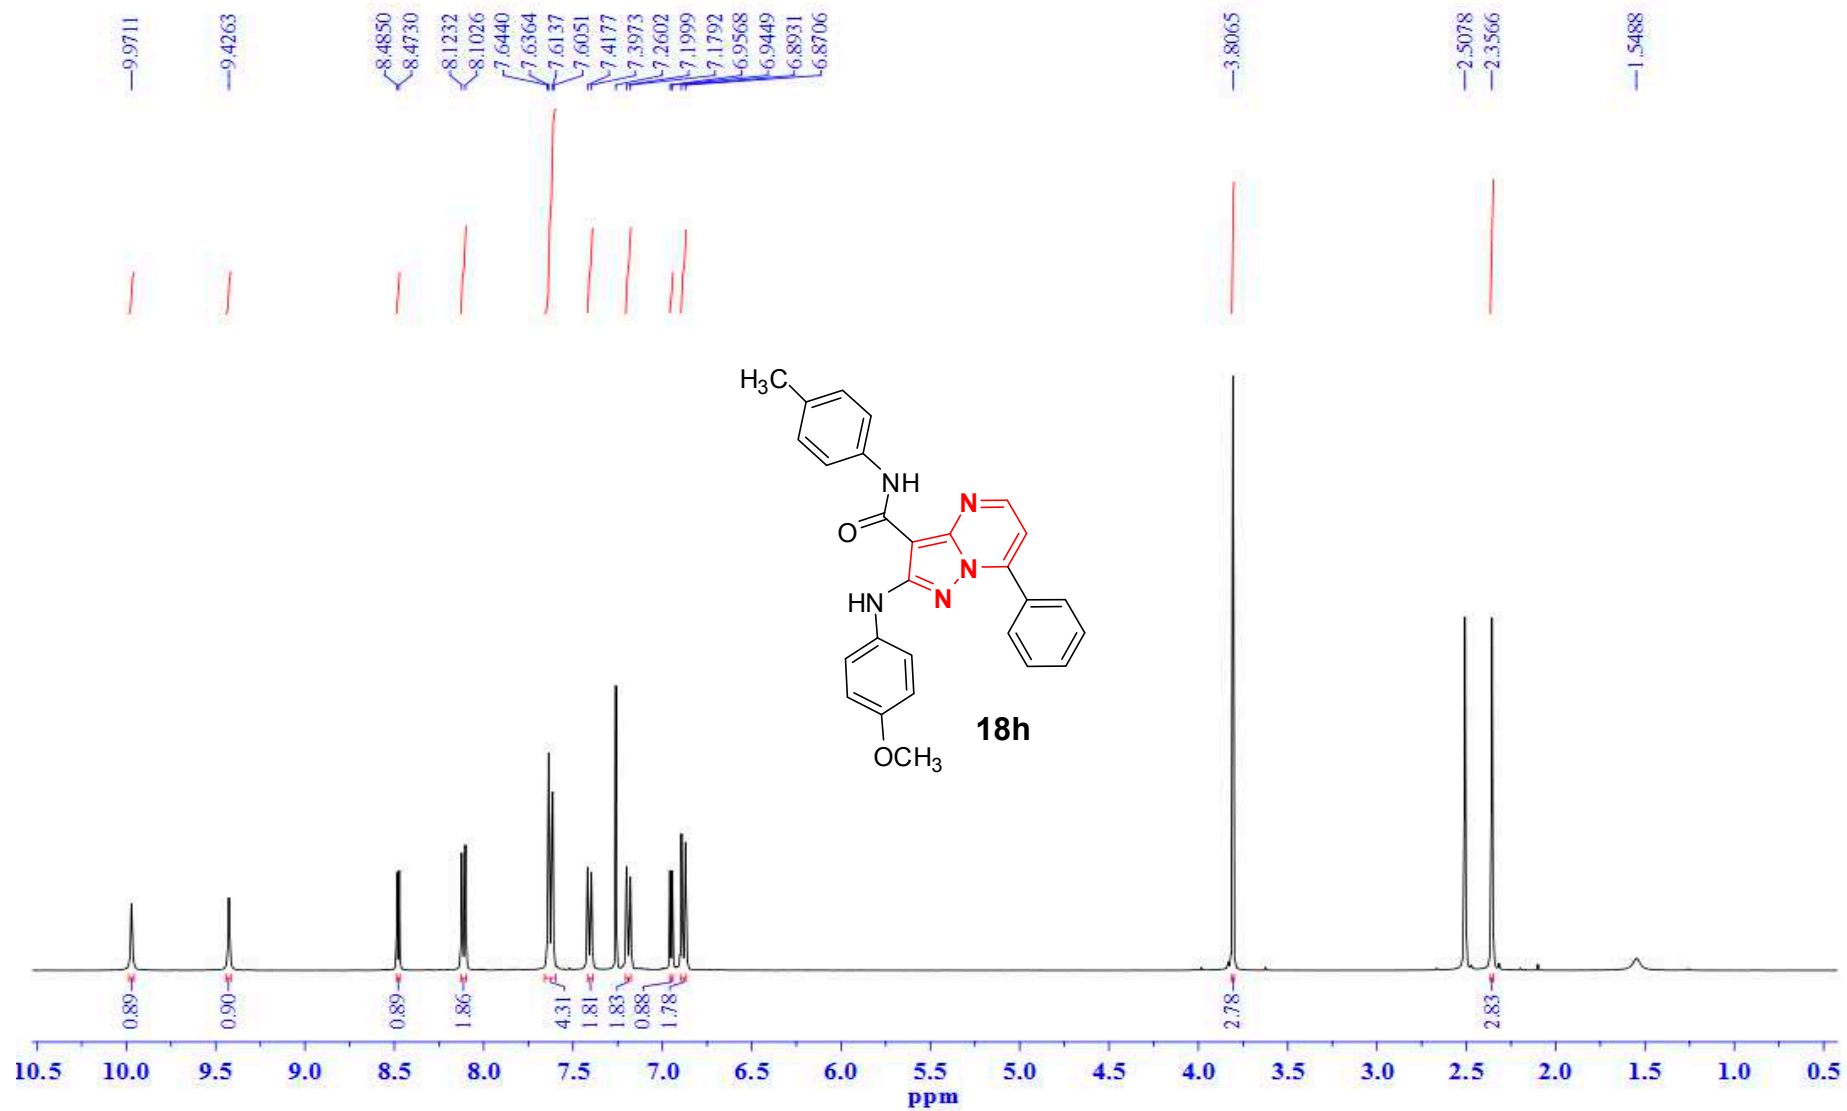

The  $^1\text{H NMR}$  (400 MHz) spectrum of compound **18h**

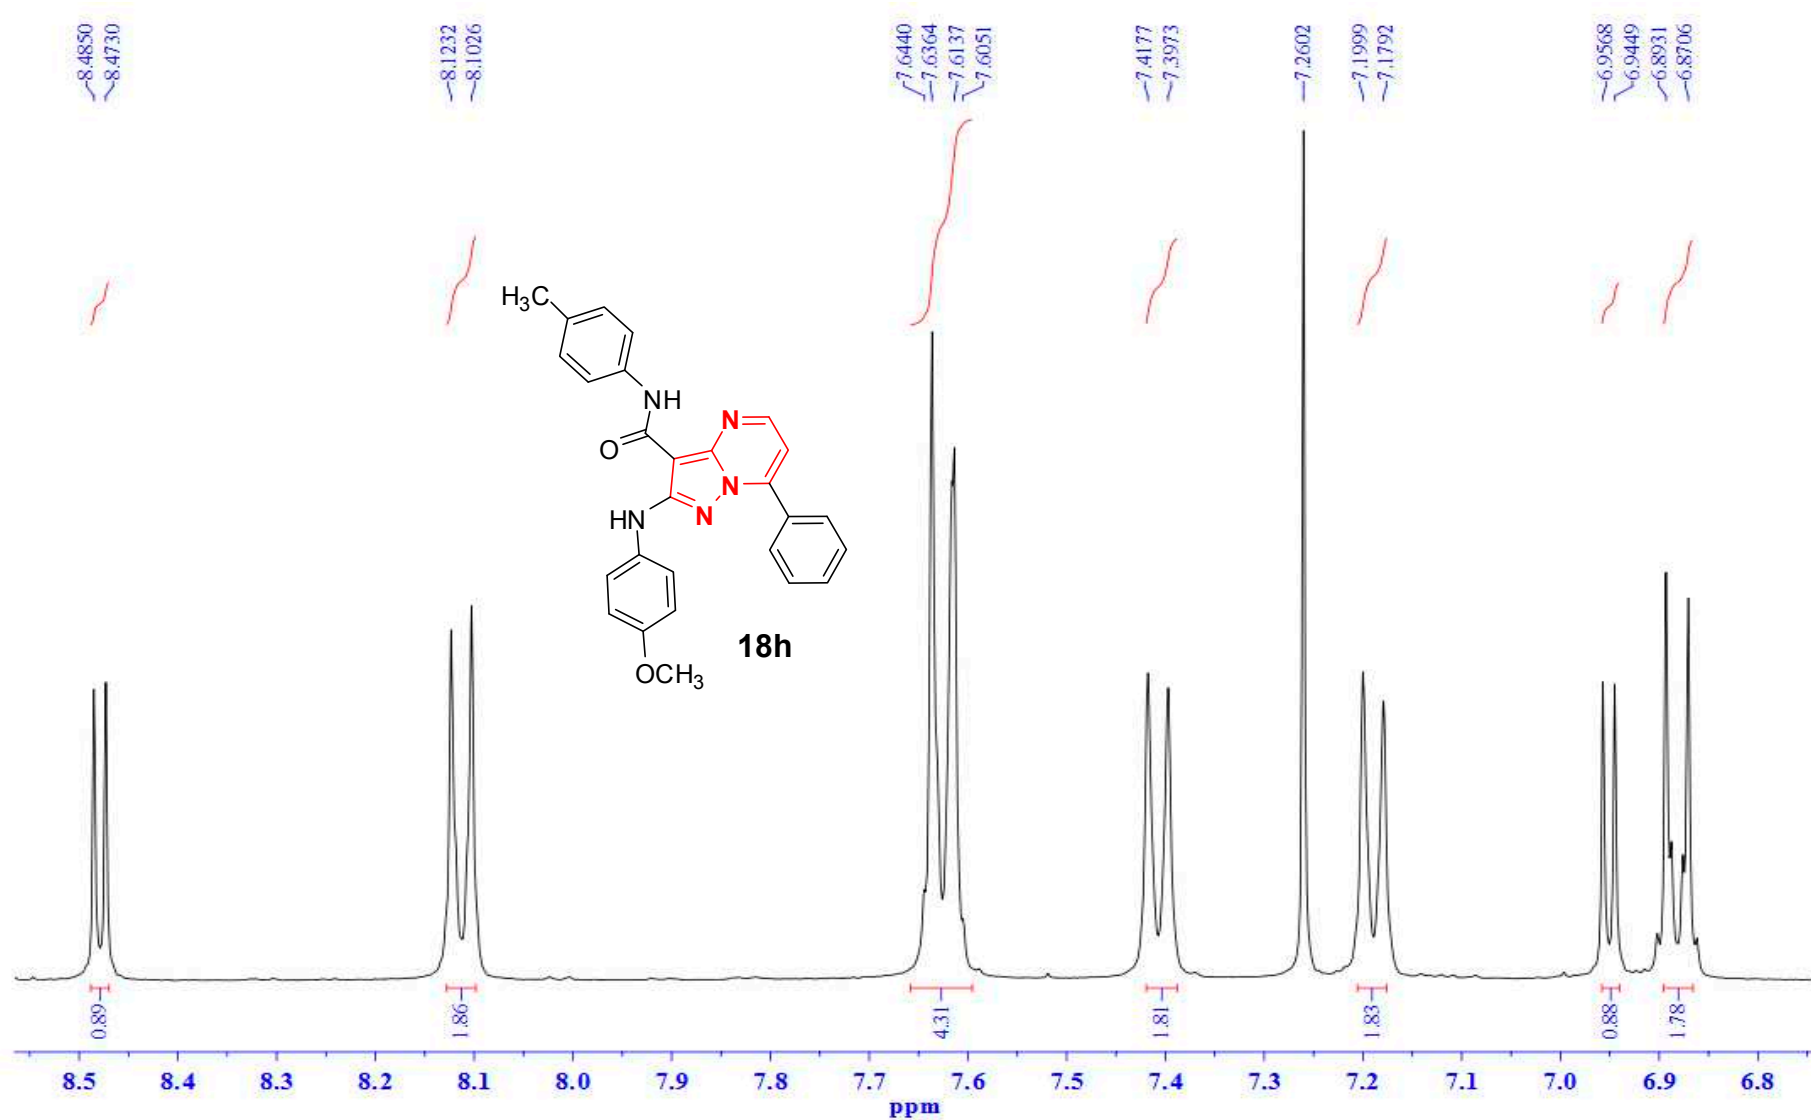

The  $^1\text{H}$  NMR (400 MHz) spectrum (aromatic region) of compound **18h**

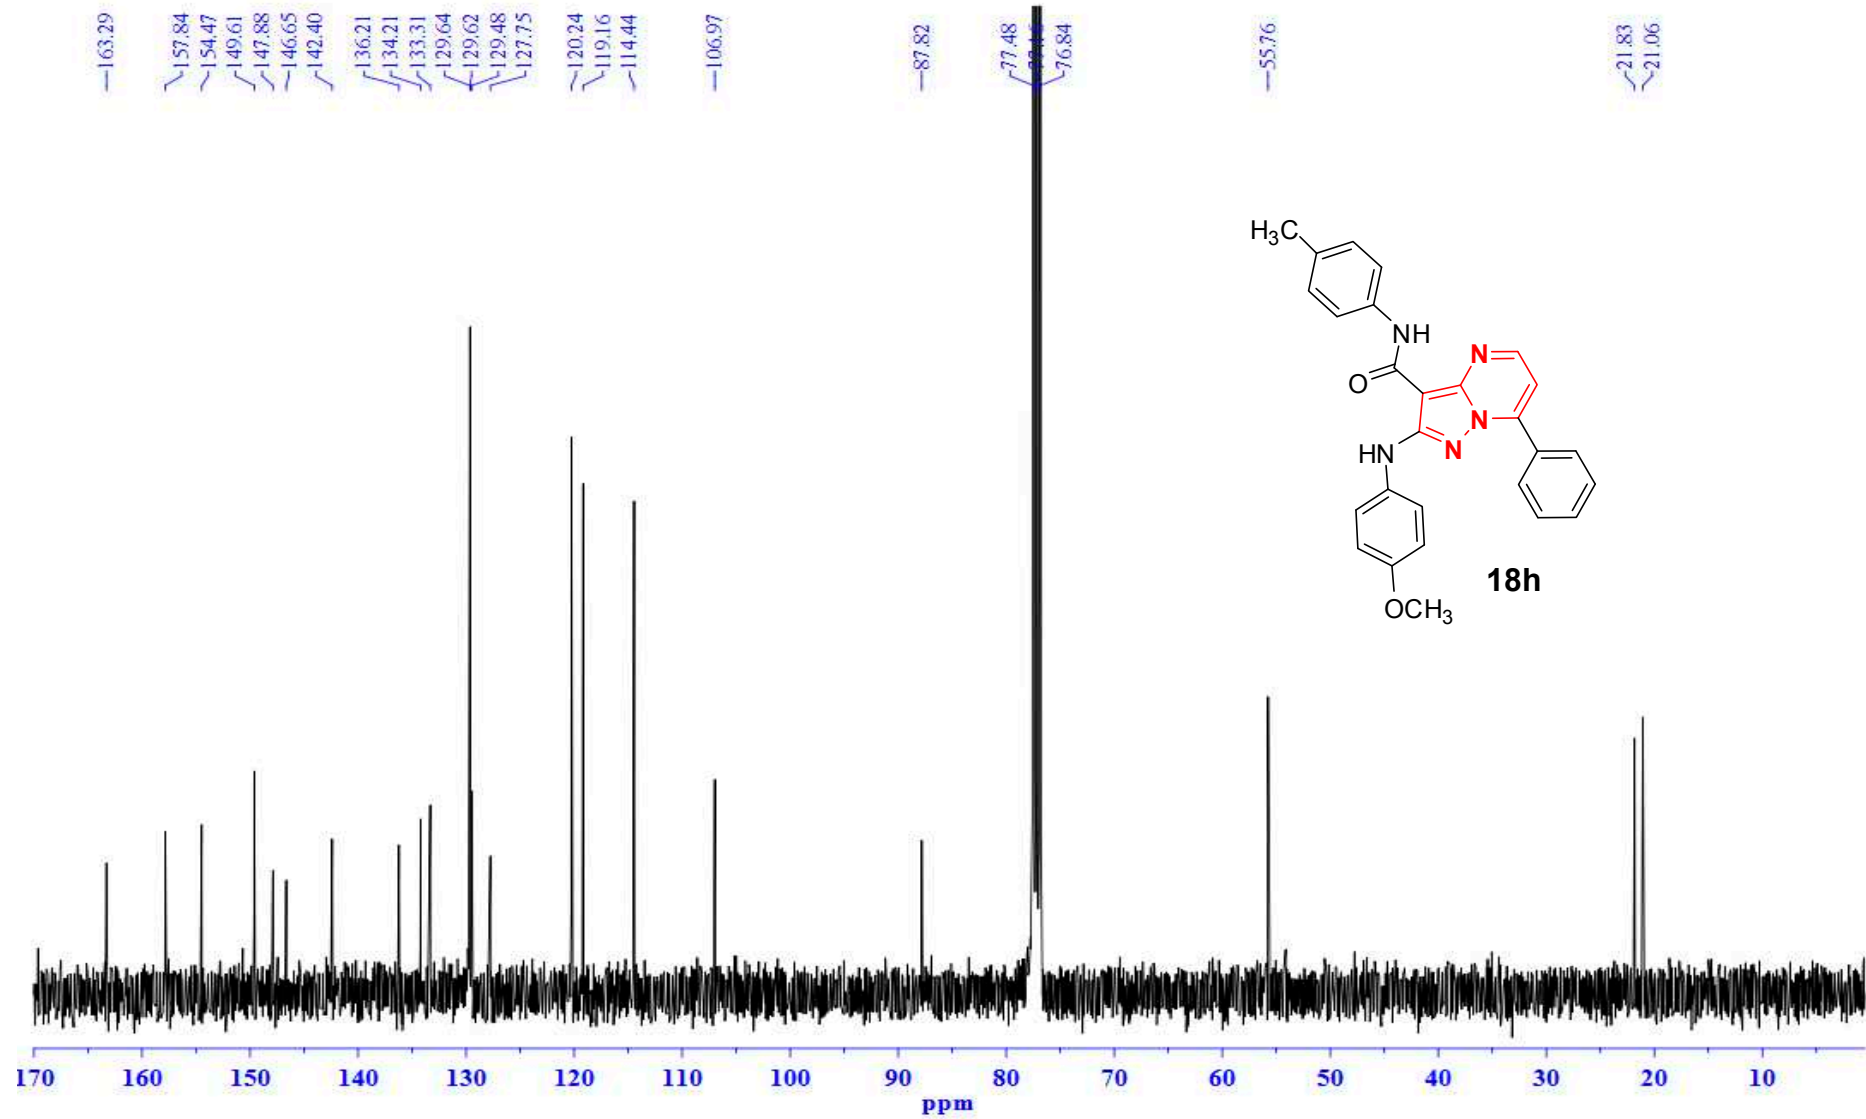

The <sup>13</sup>C NMR (100 MHz) spectrum of compound **18h**

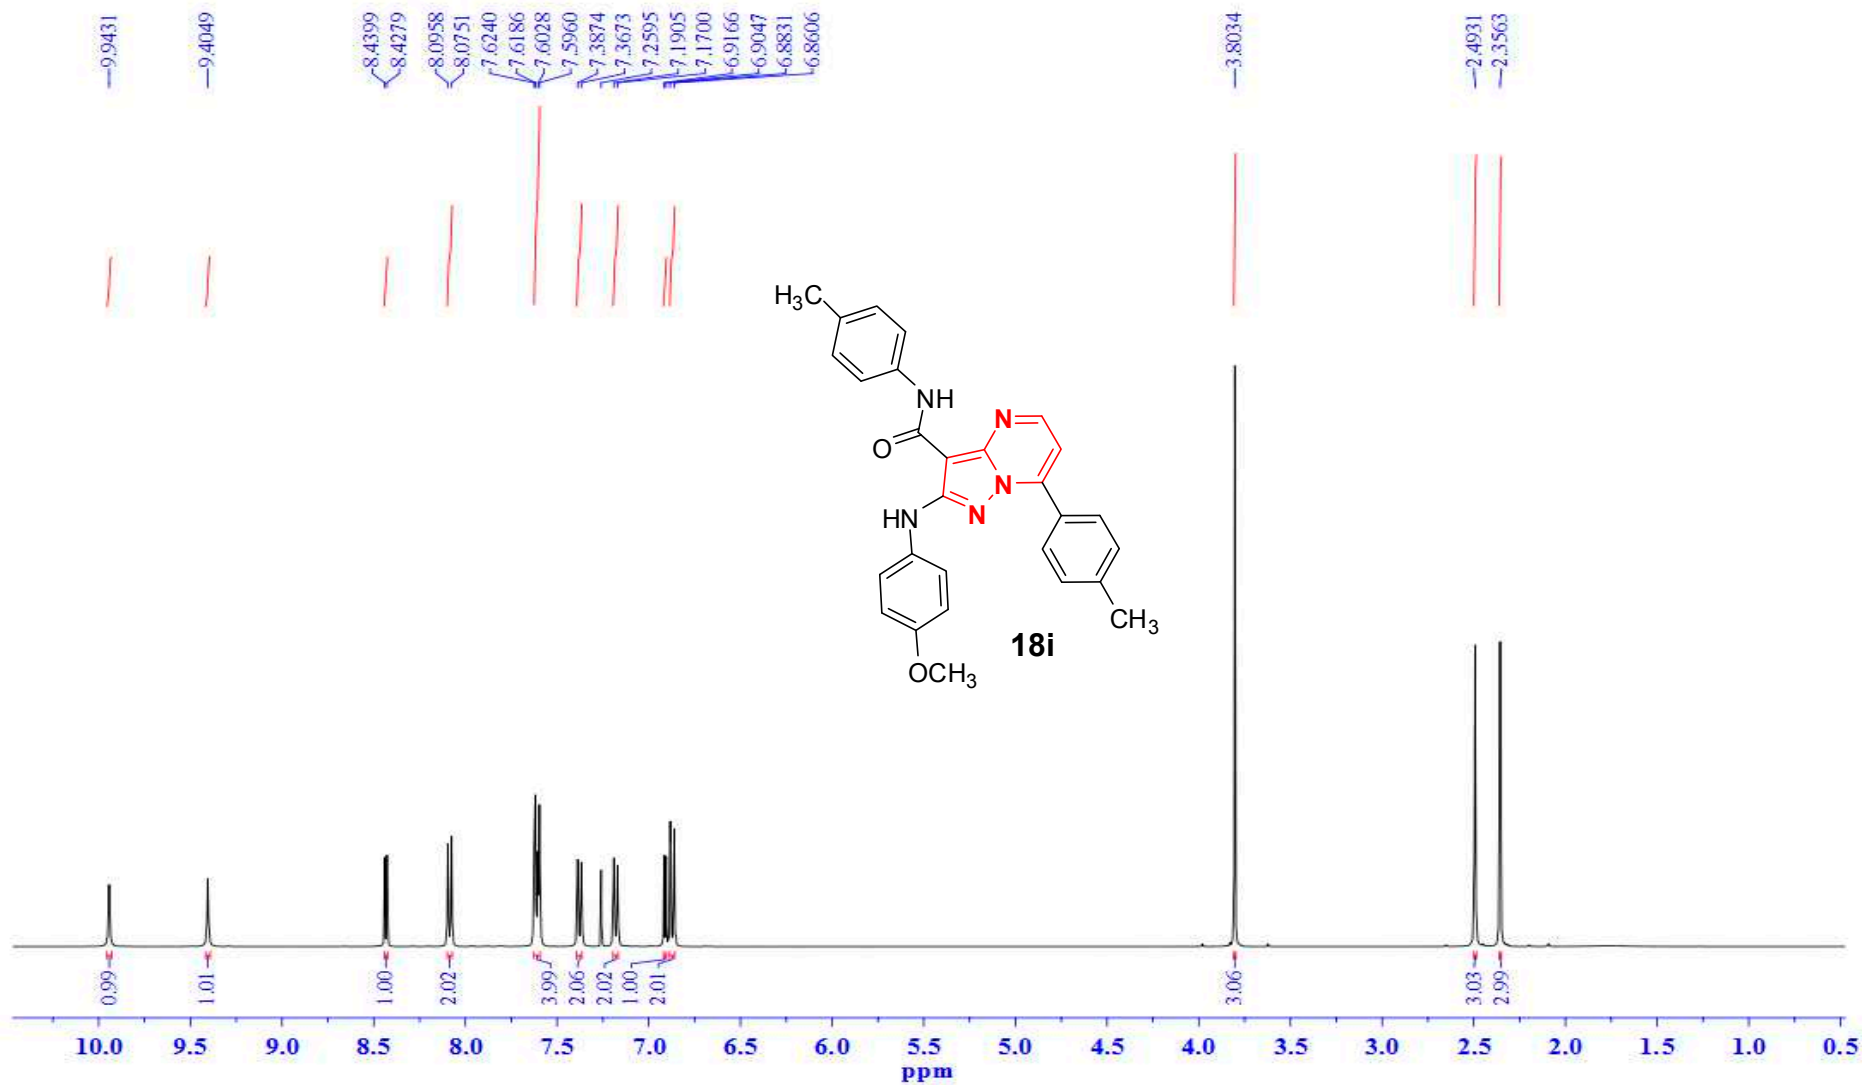

The  $^1\text{H}$  NMR (400 MHz) spectrum of compound **18i**

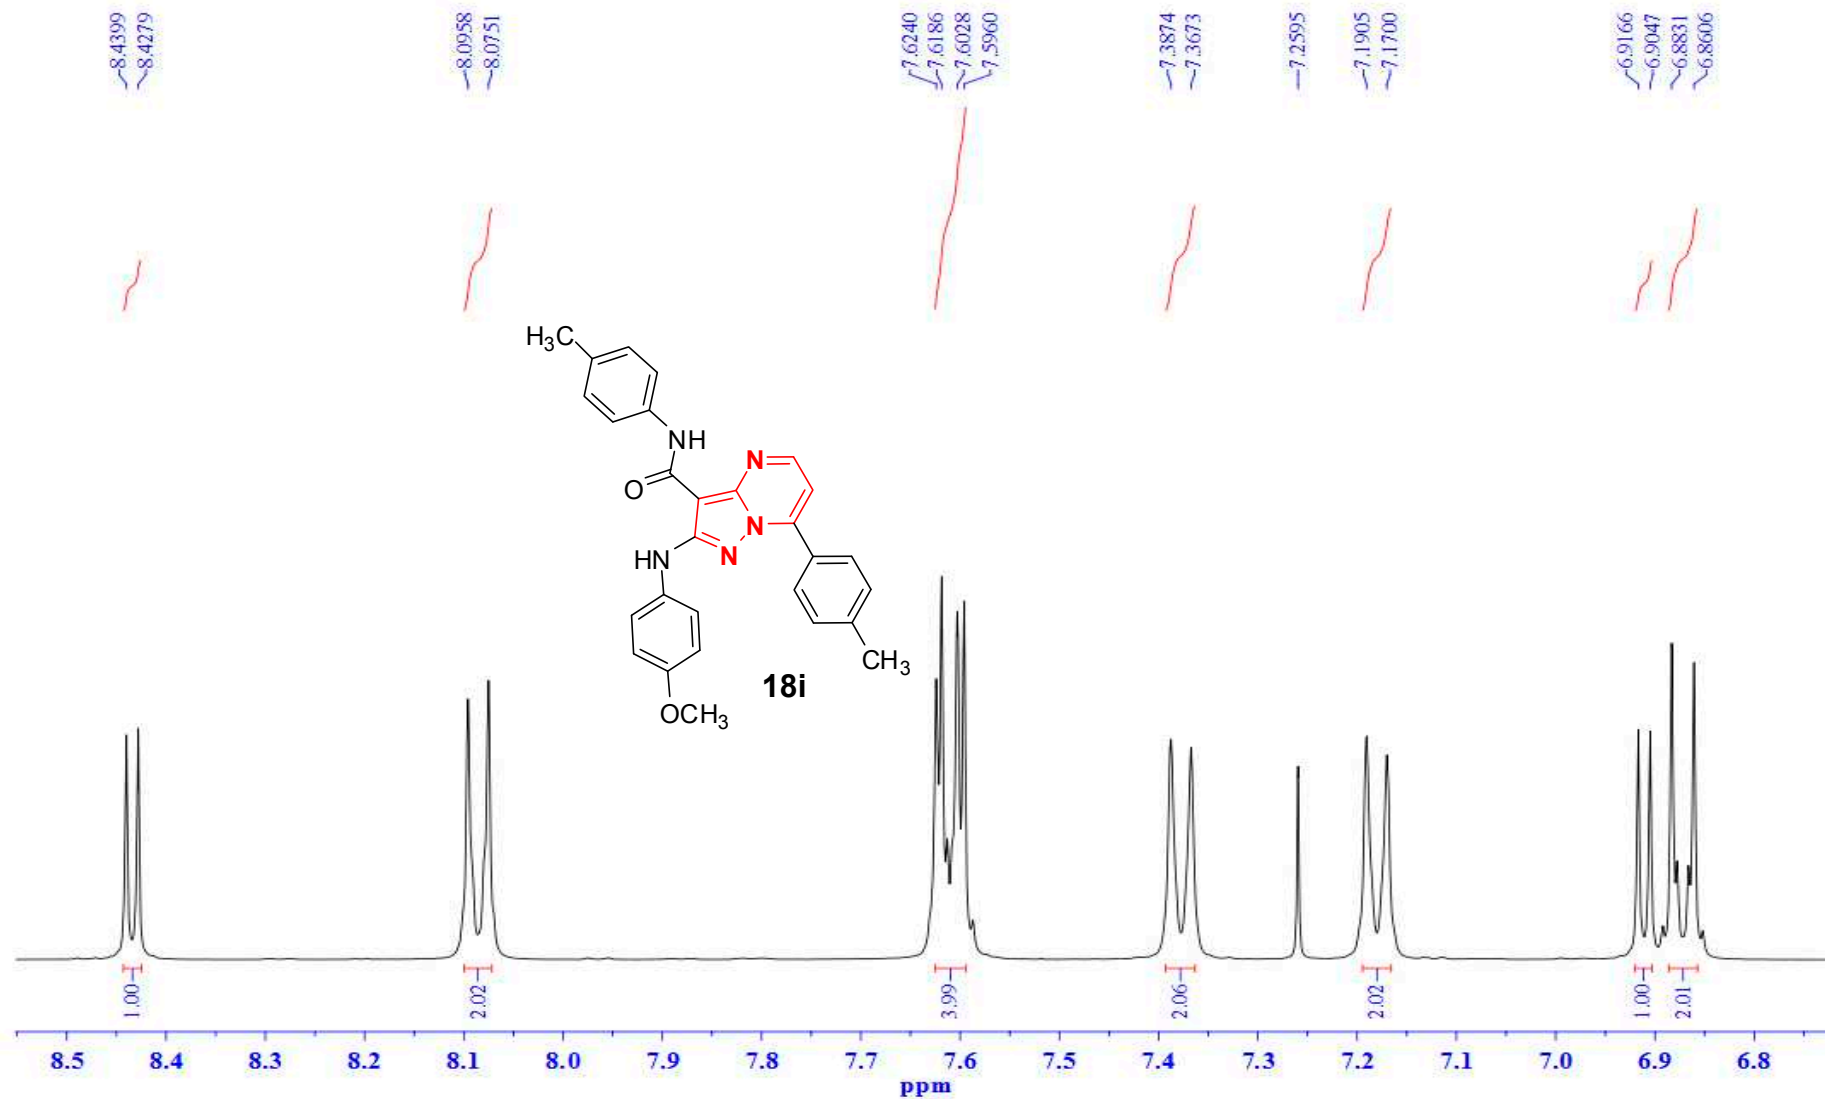

The <sup>1</sup>H NMR (400 MHz) spectrum (aromatic region) of compound **18i**



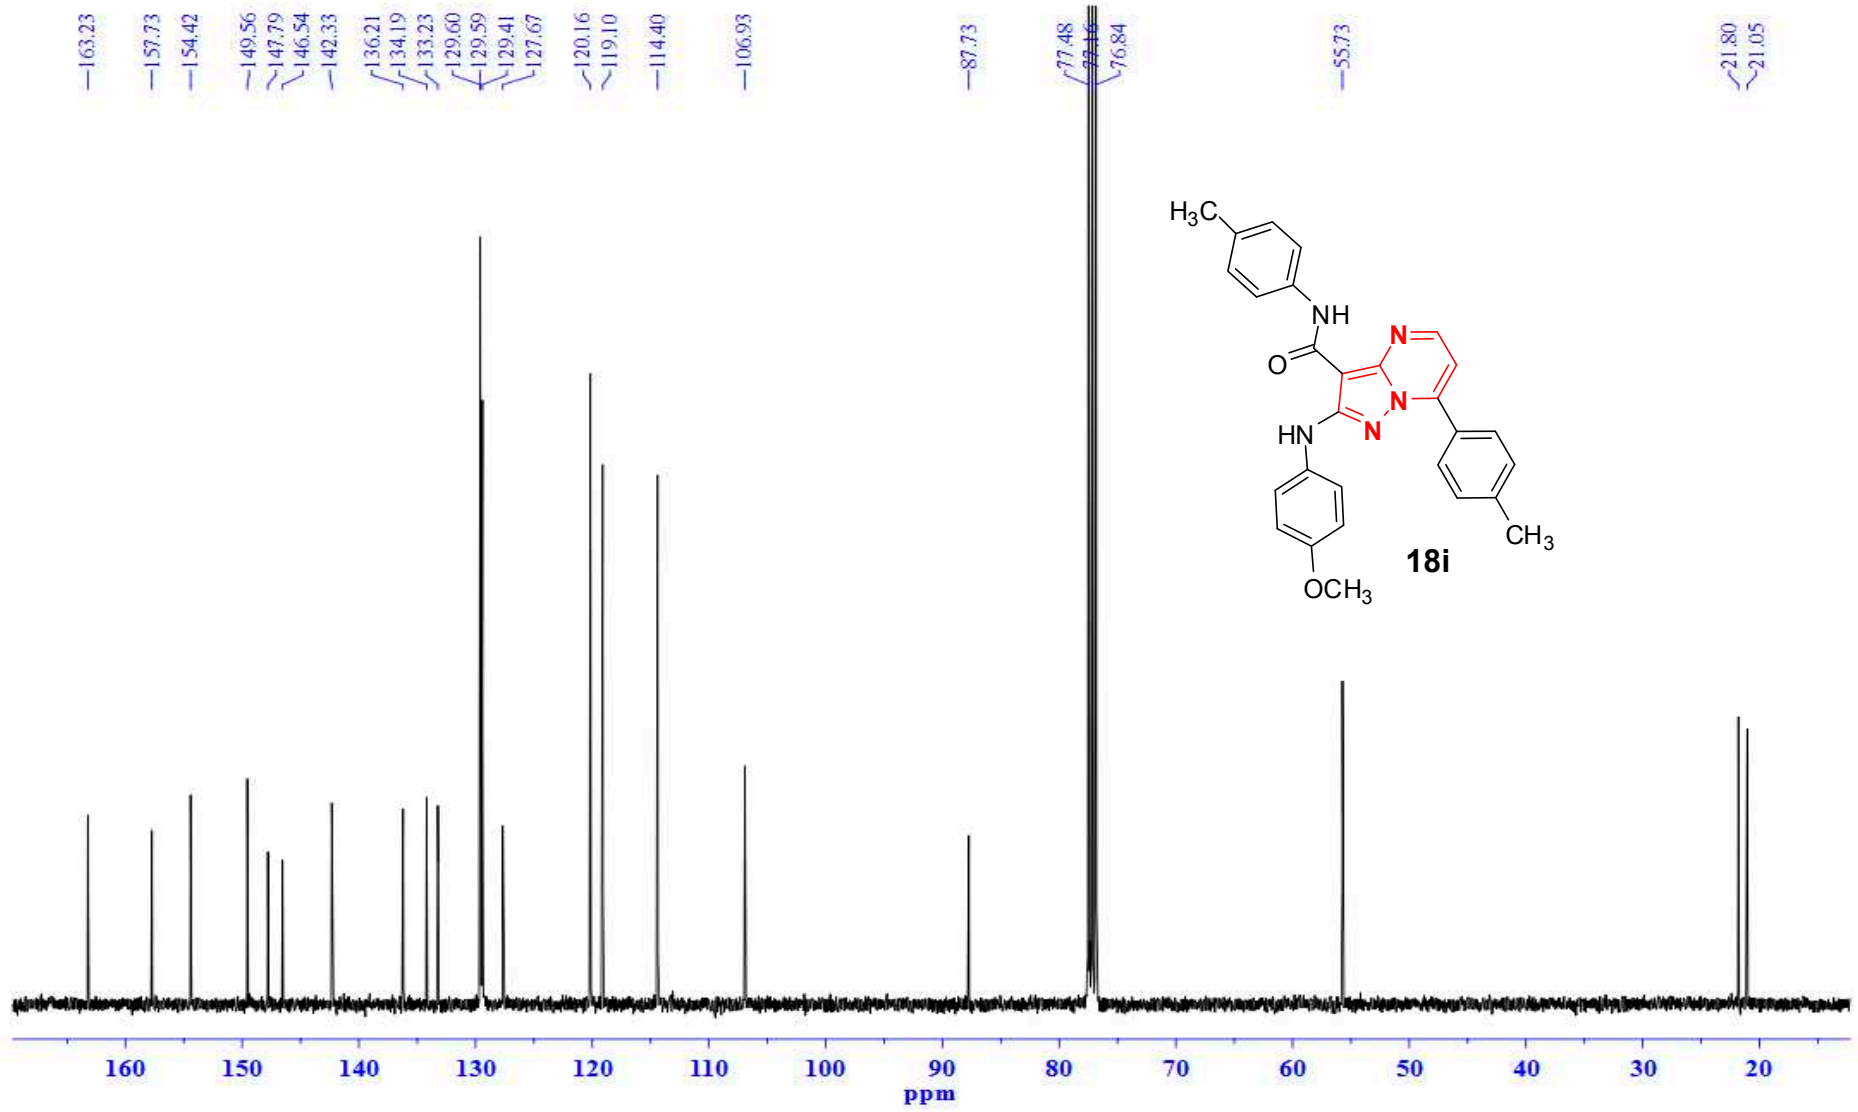

The  $^{13}\text{C}$  NMR (100 MHz) spectrum of compound **18i**

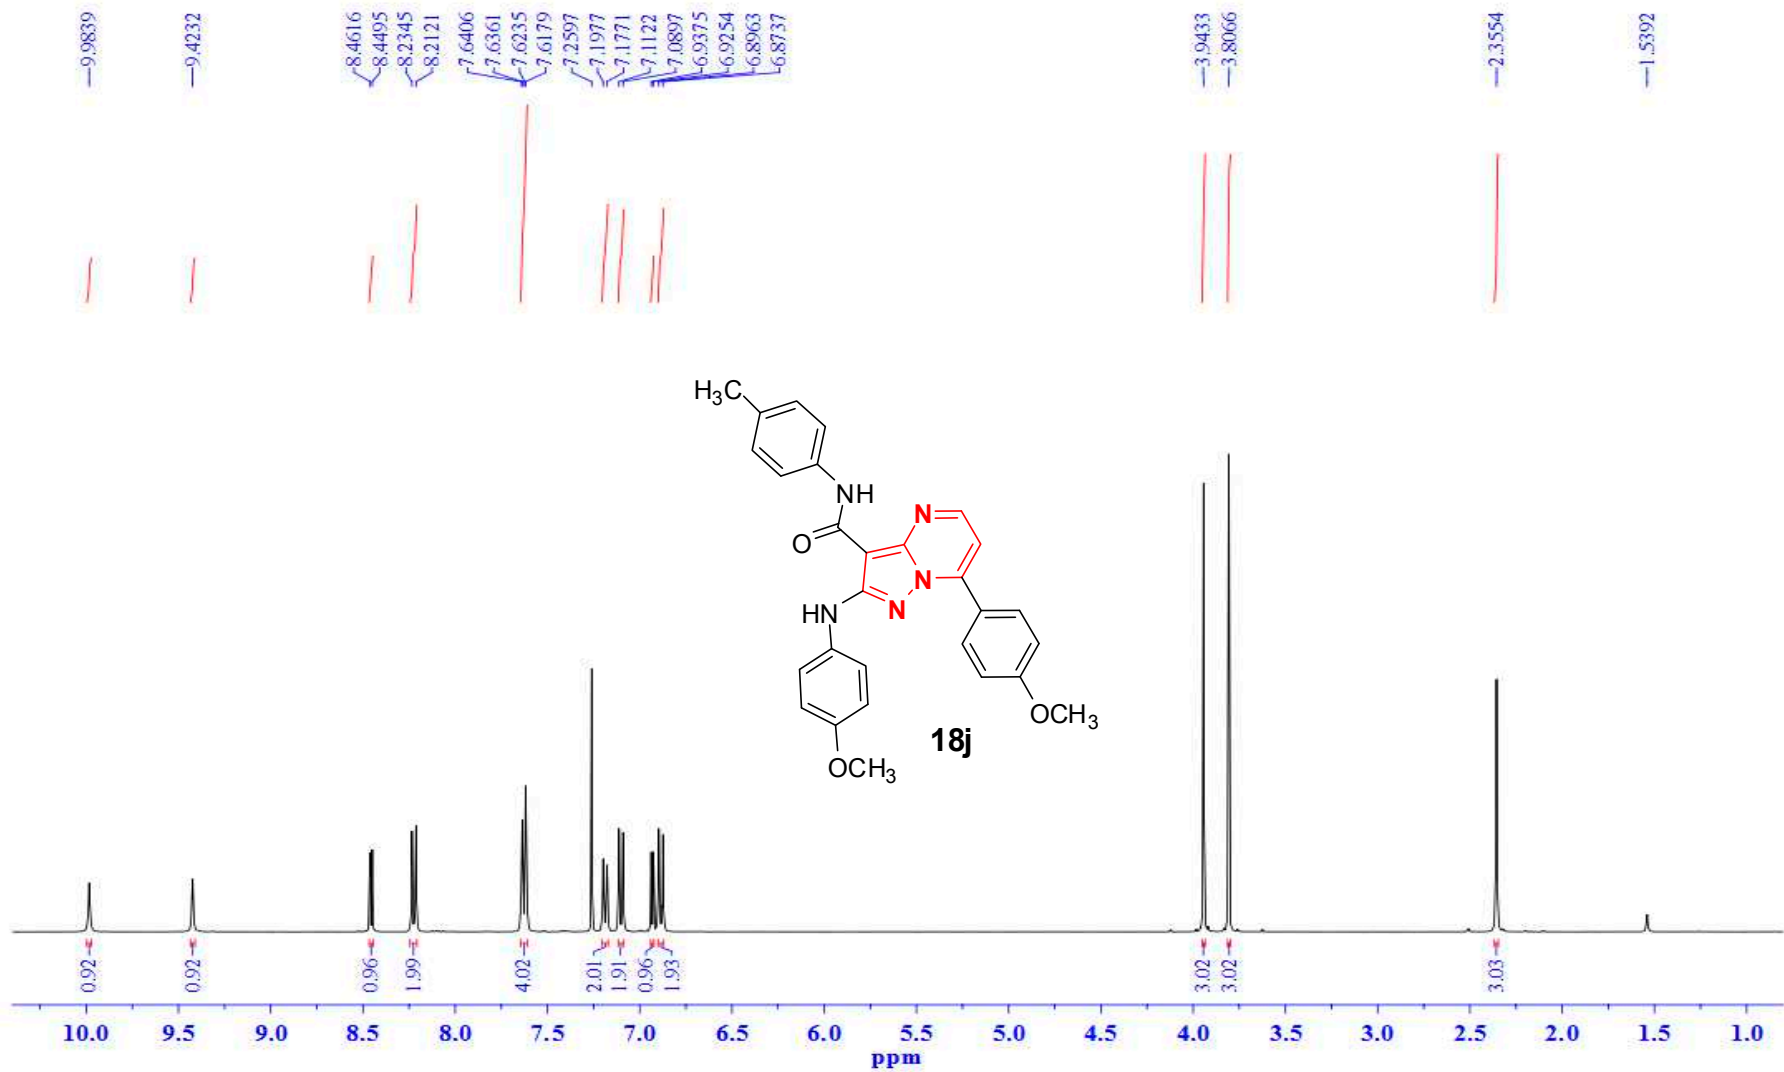

The  $^1\text{H}$  NMR (400 MHz) spectrum of compound **18j**

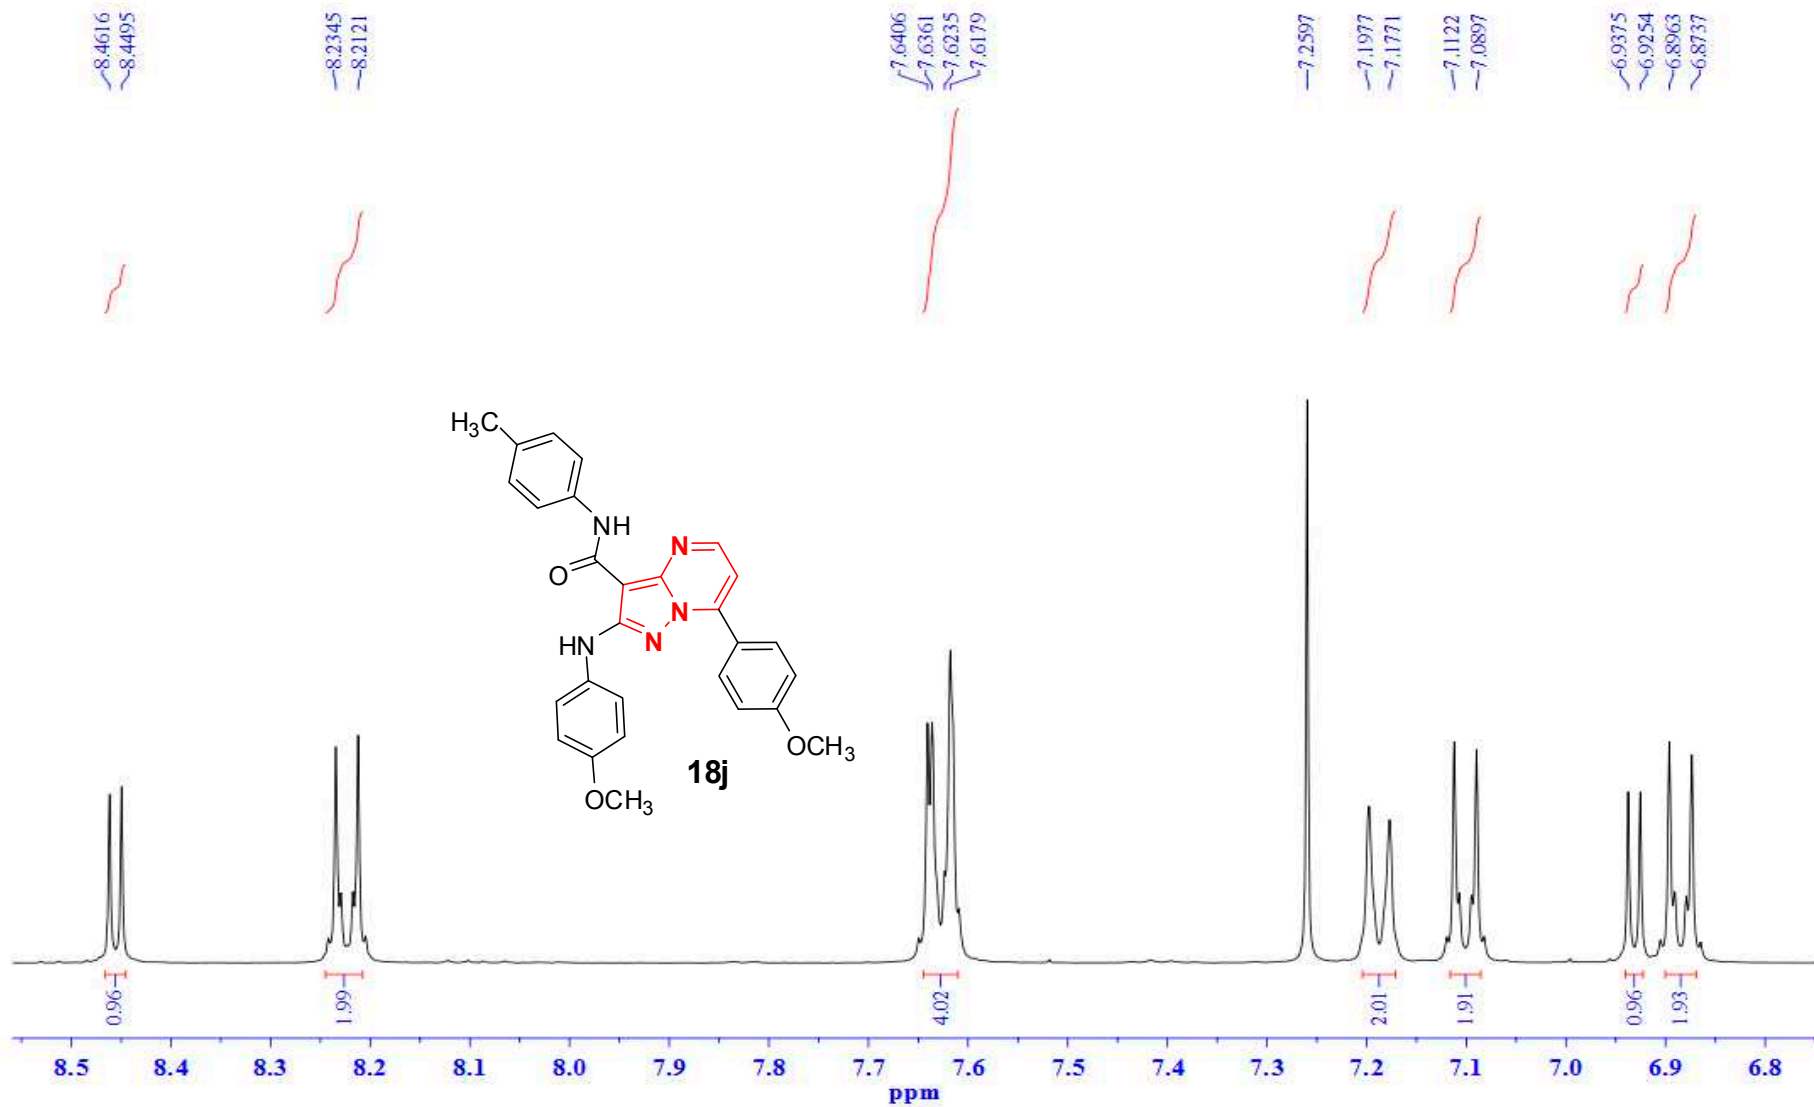

The <sup>1</sup>H NMR (400 MHz) spectrum (aromatic region) of compound **18j**

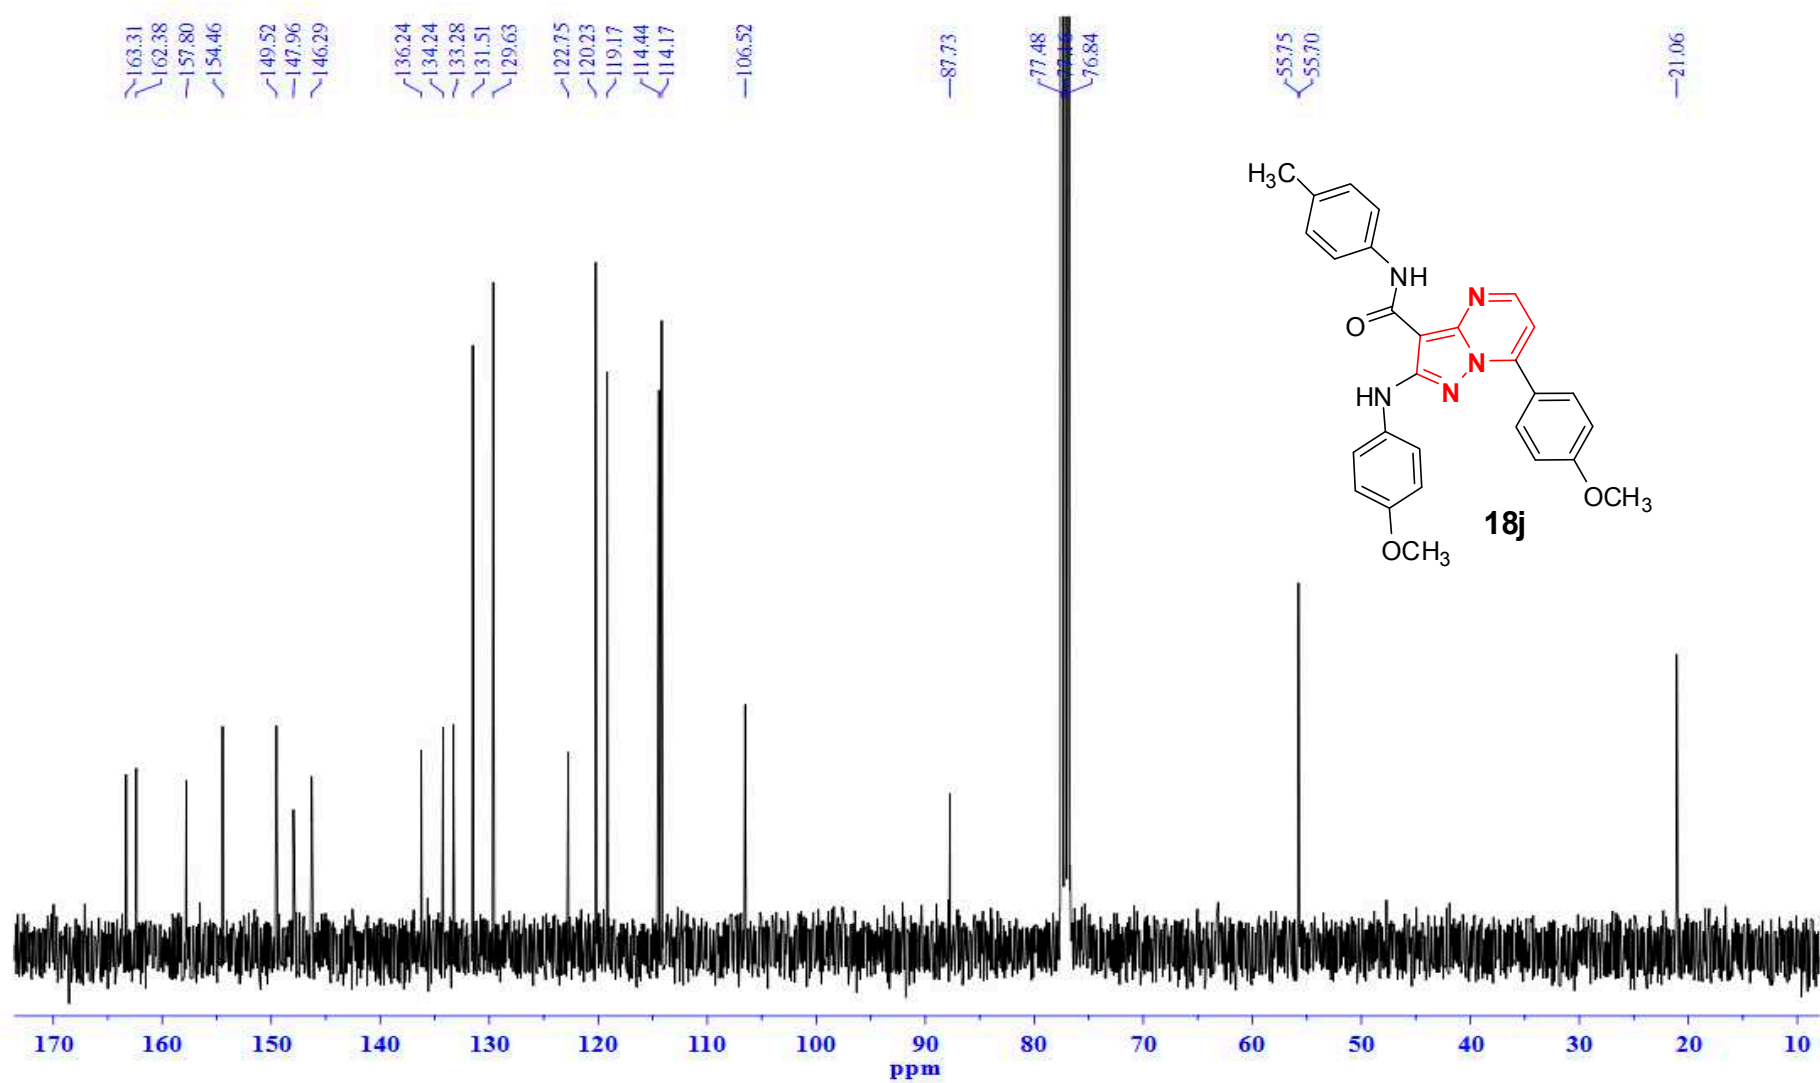

The <sup>13</sup>C NMR (100 MHz) spectrum of compound **18j**

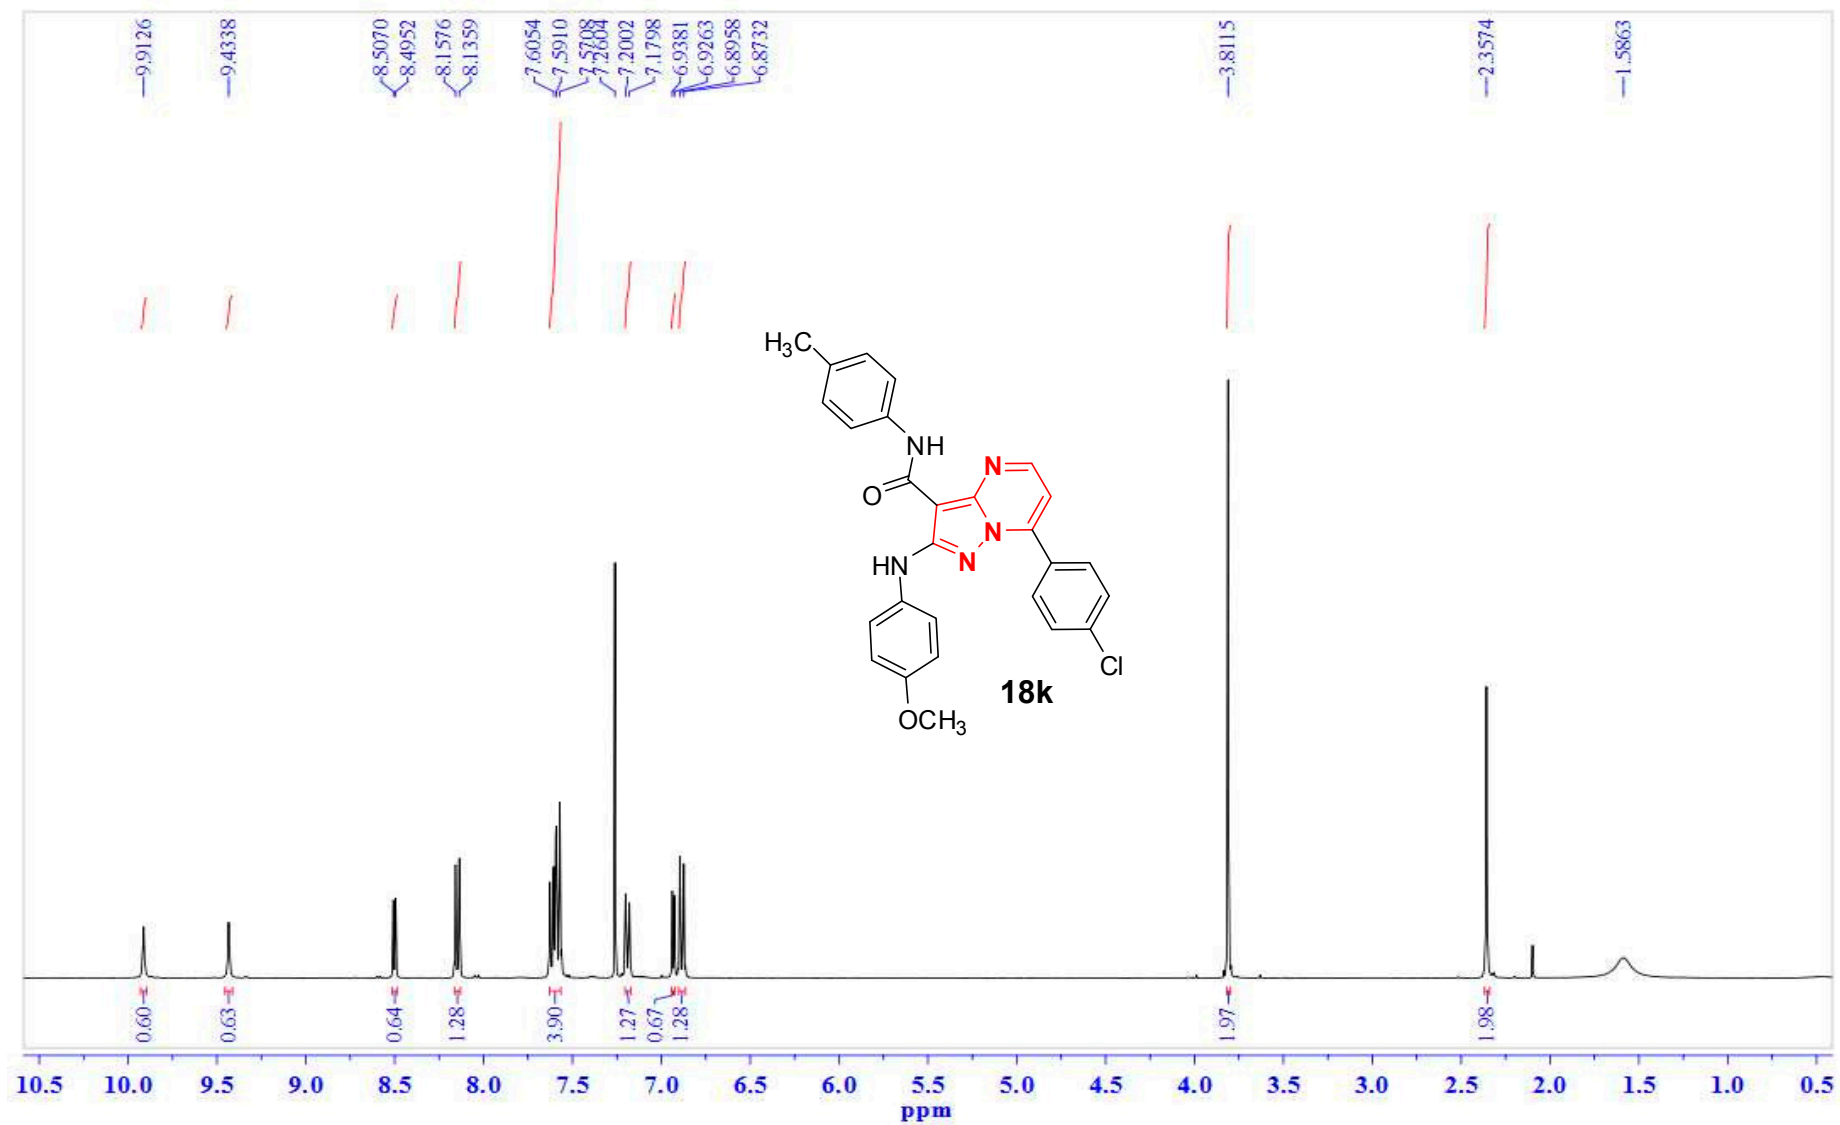

The  $^1\text{H}$  NMR (400 MHz) spectrum of compound **18k**

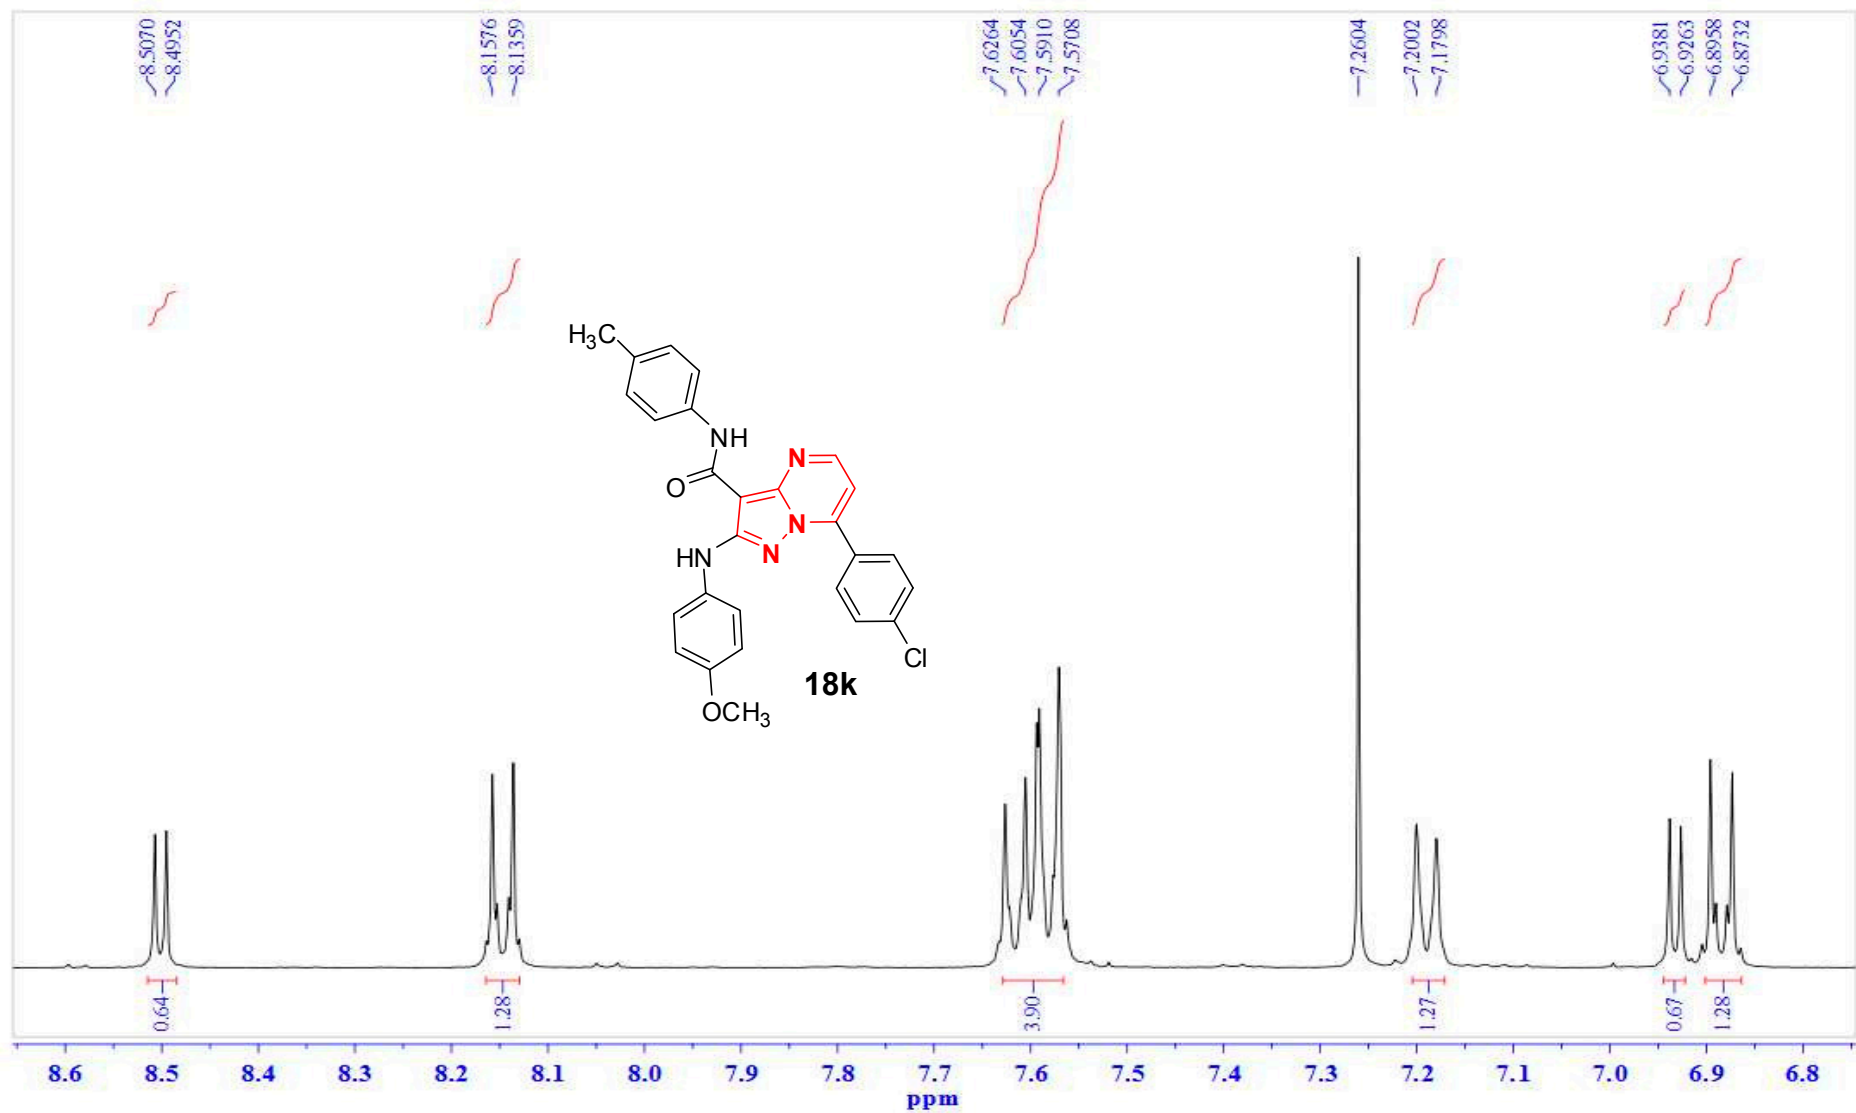

The <sup>1</sup>H NMR (400 MHz) spectrum (aromatic region) of compound **18k**

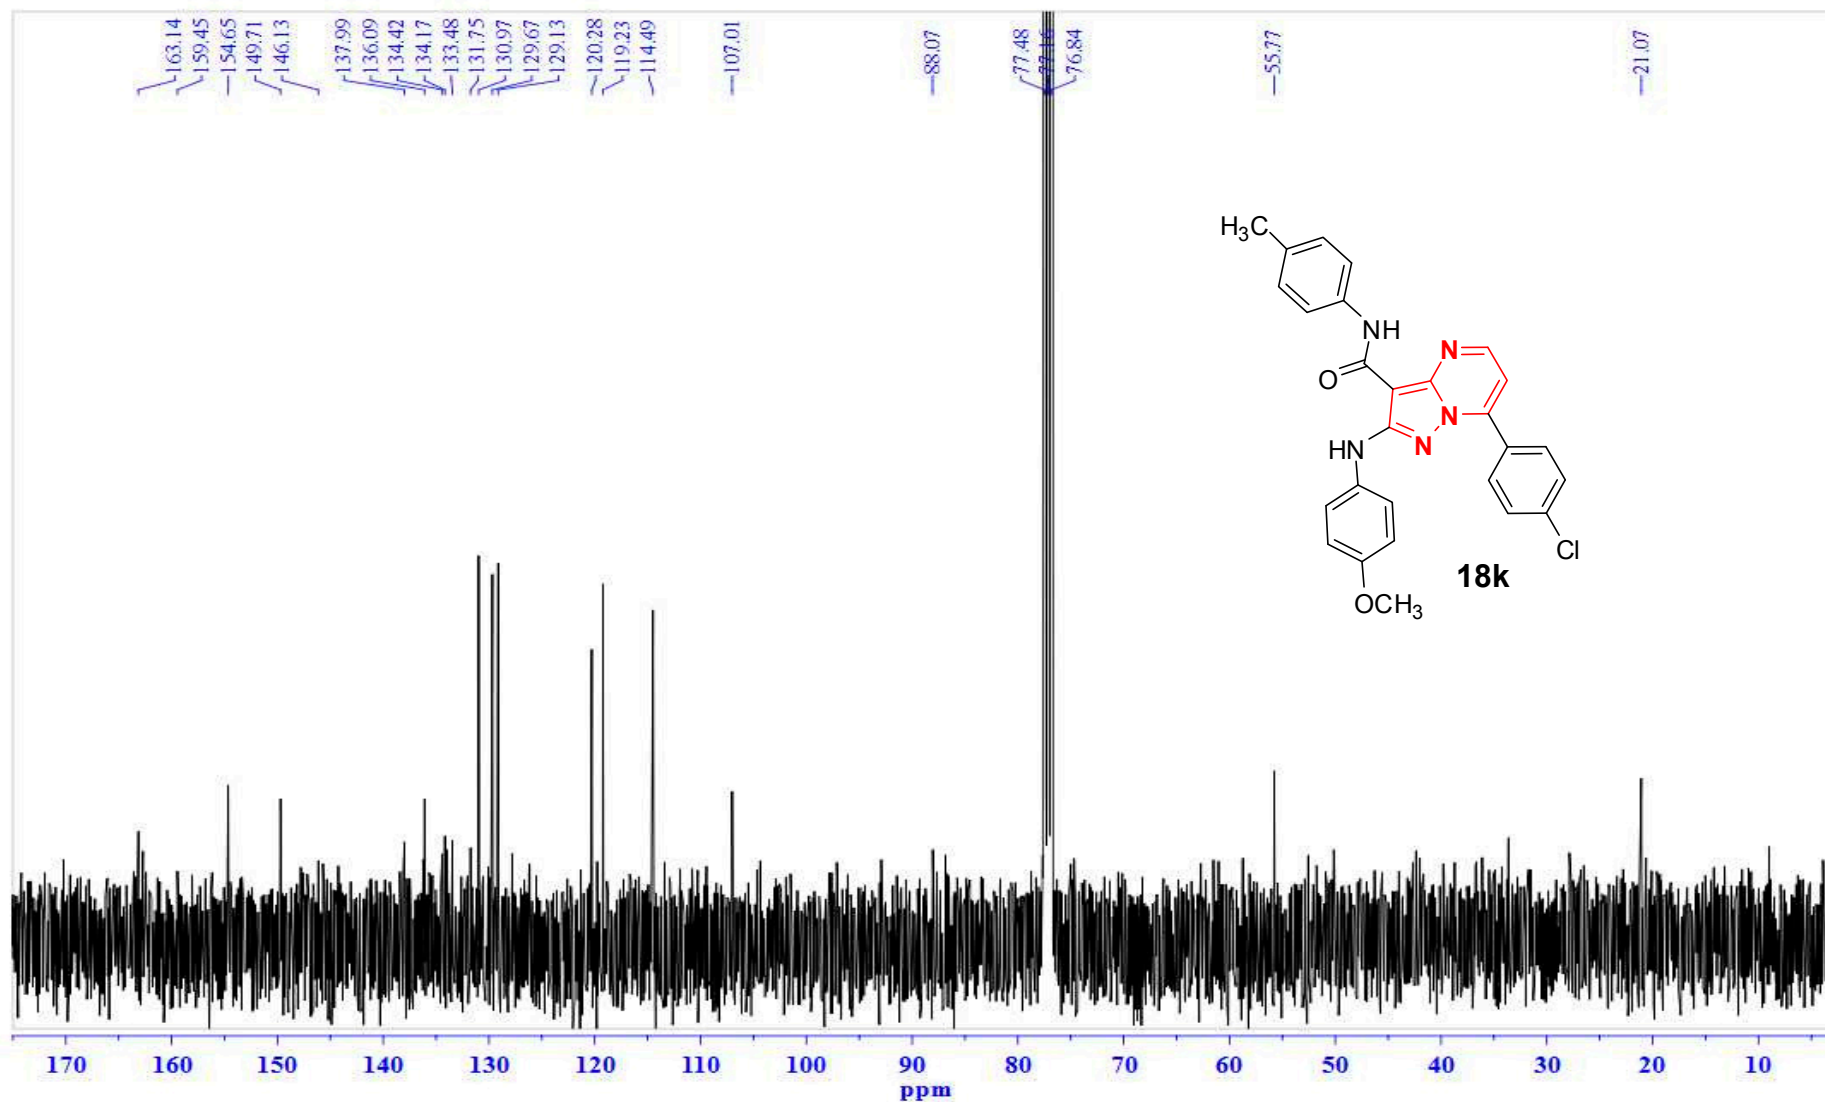

The  $^{13}\text{C}$  NMR (100 MHz) spectrum of compound **18k**

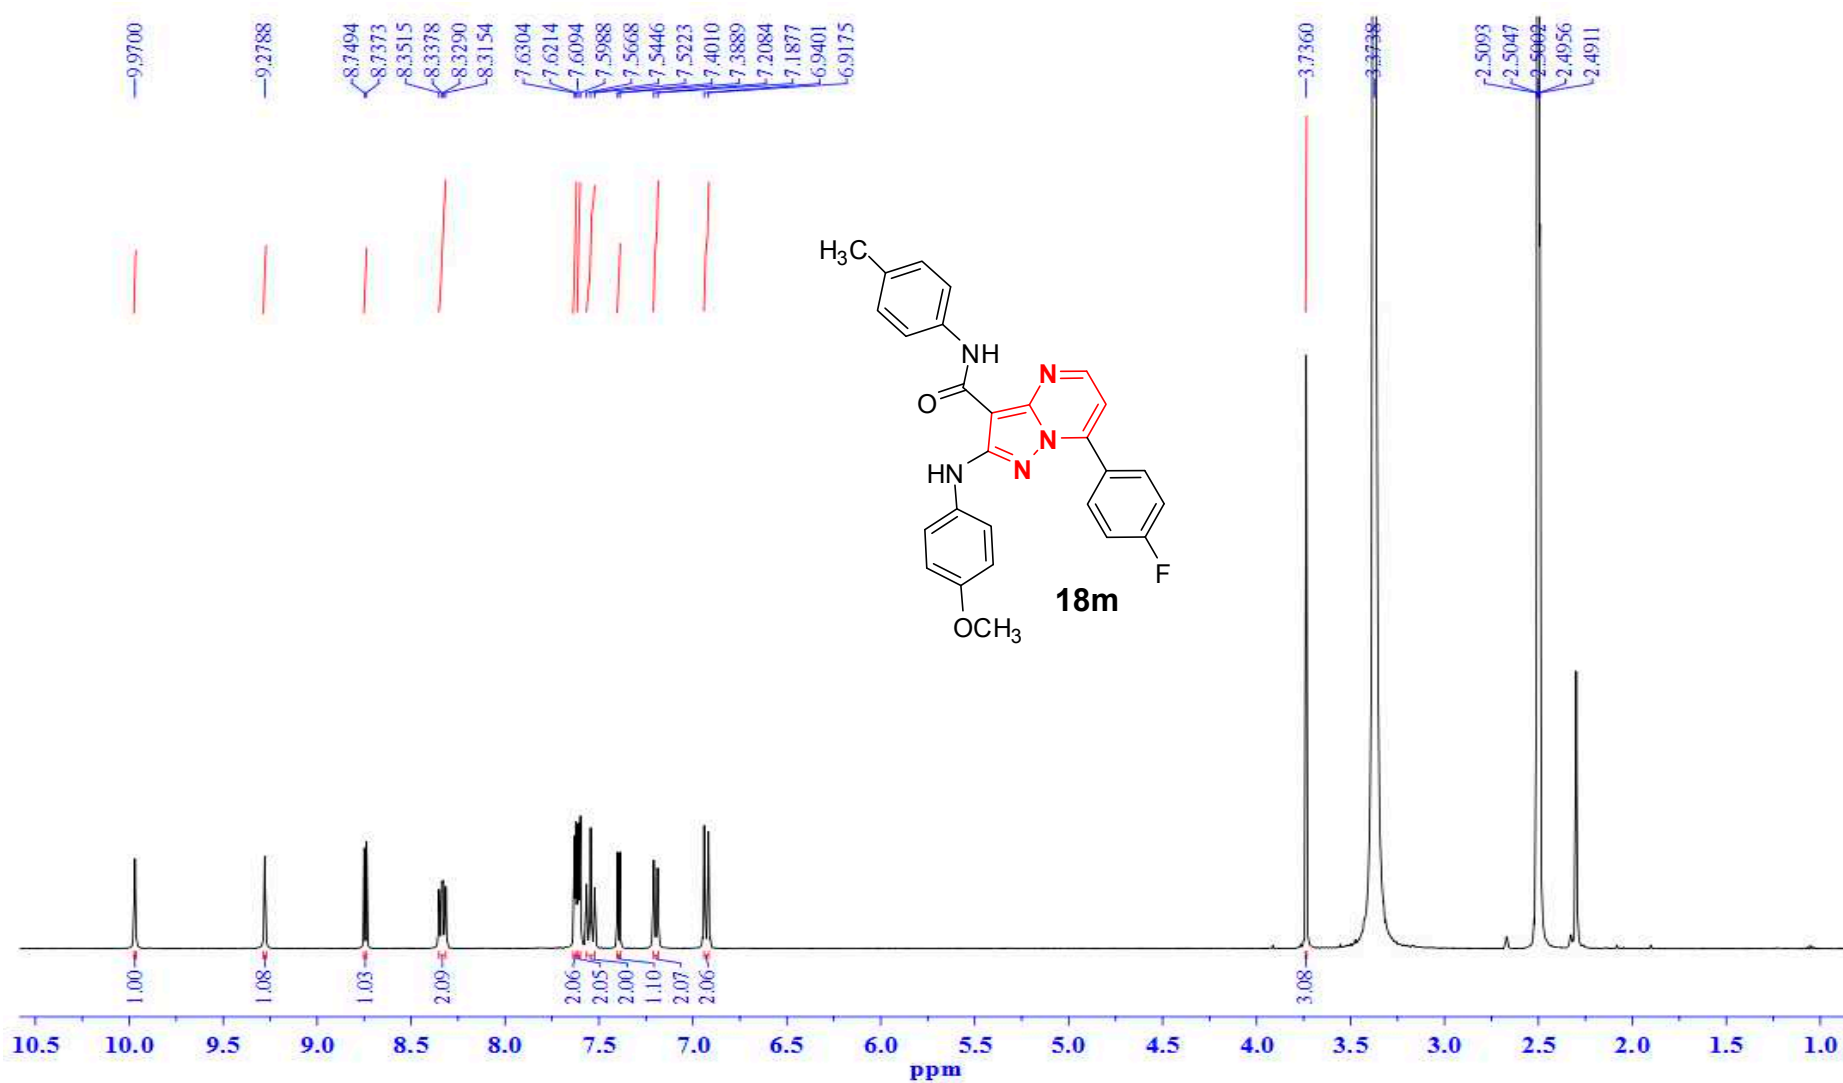

The <sup>1</sup>H NMR (400 MHz) spectrum of compound **18m**



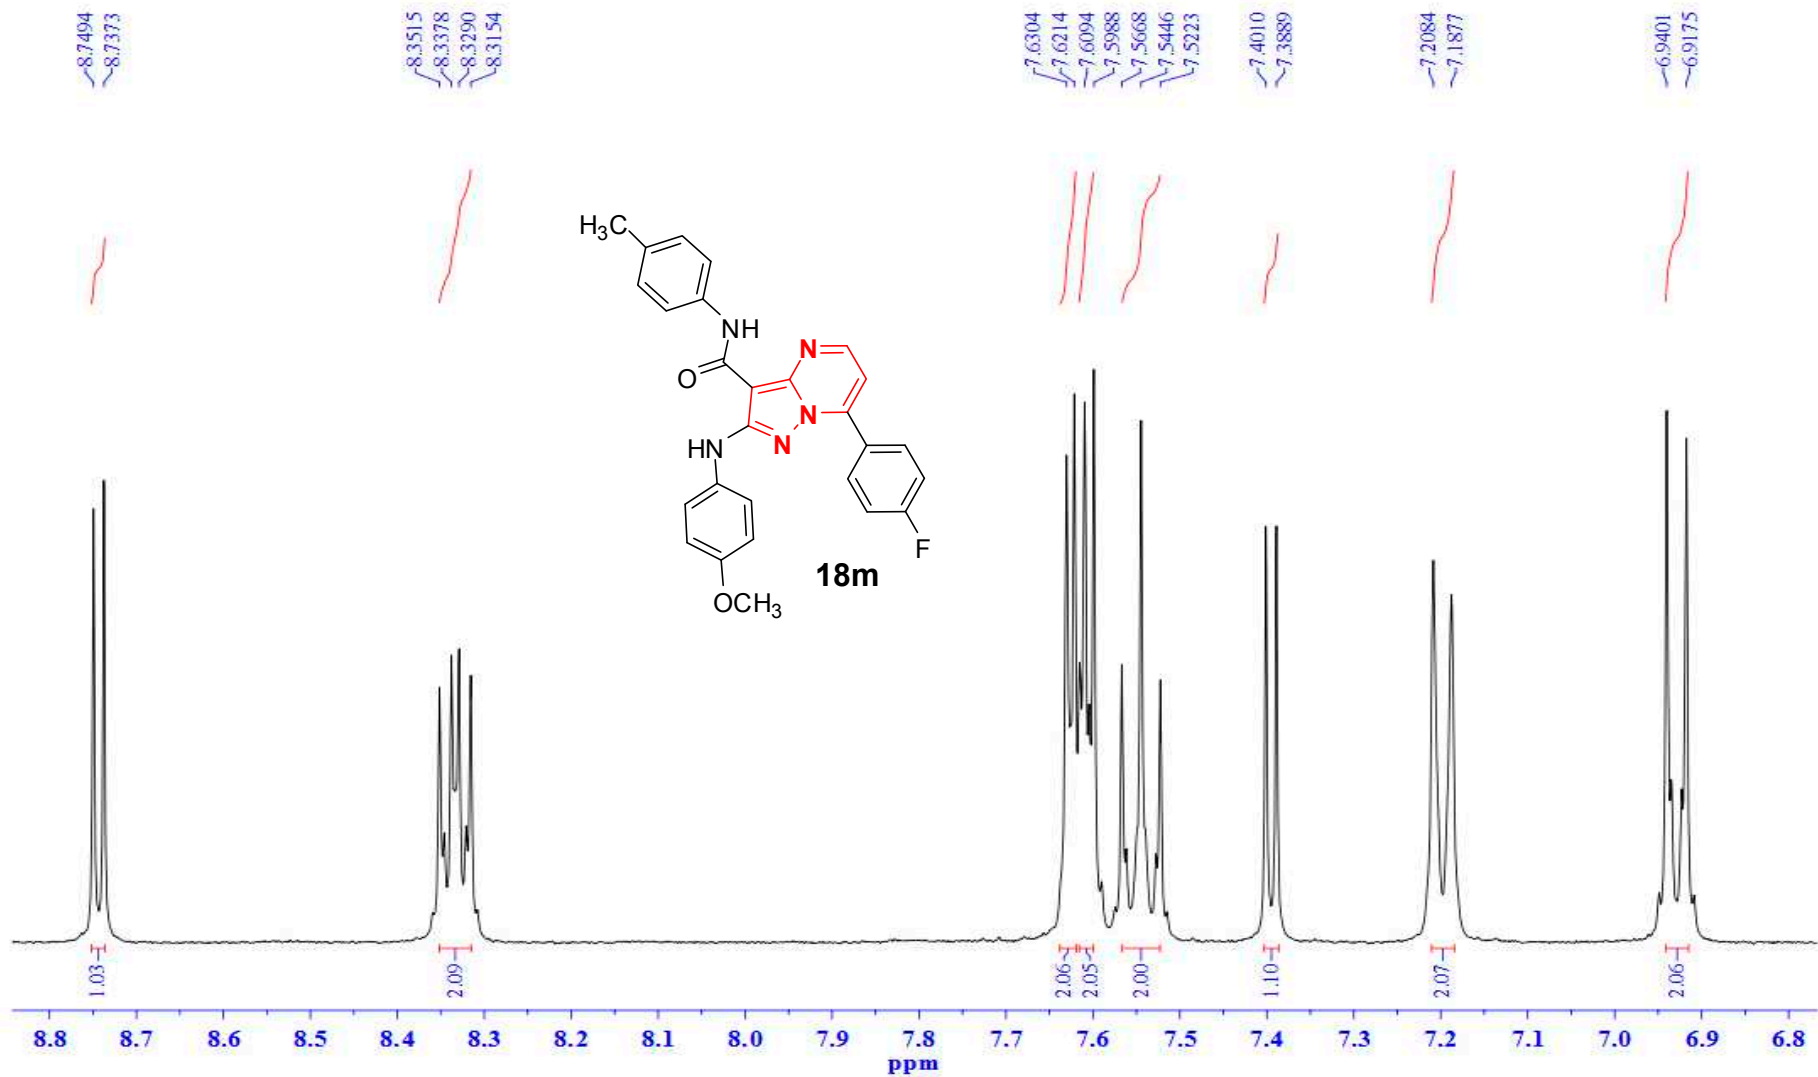

The  $^1\text{H}$  NMR (400 MHz) spectrum (aromatic region) of compound **18m**

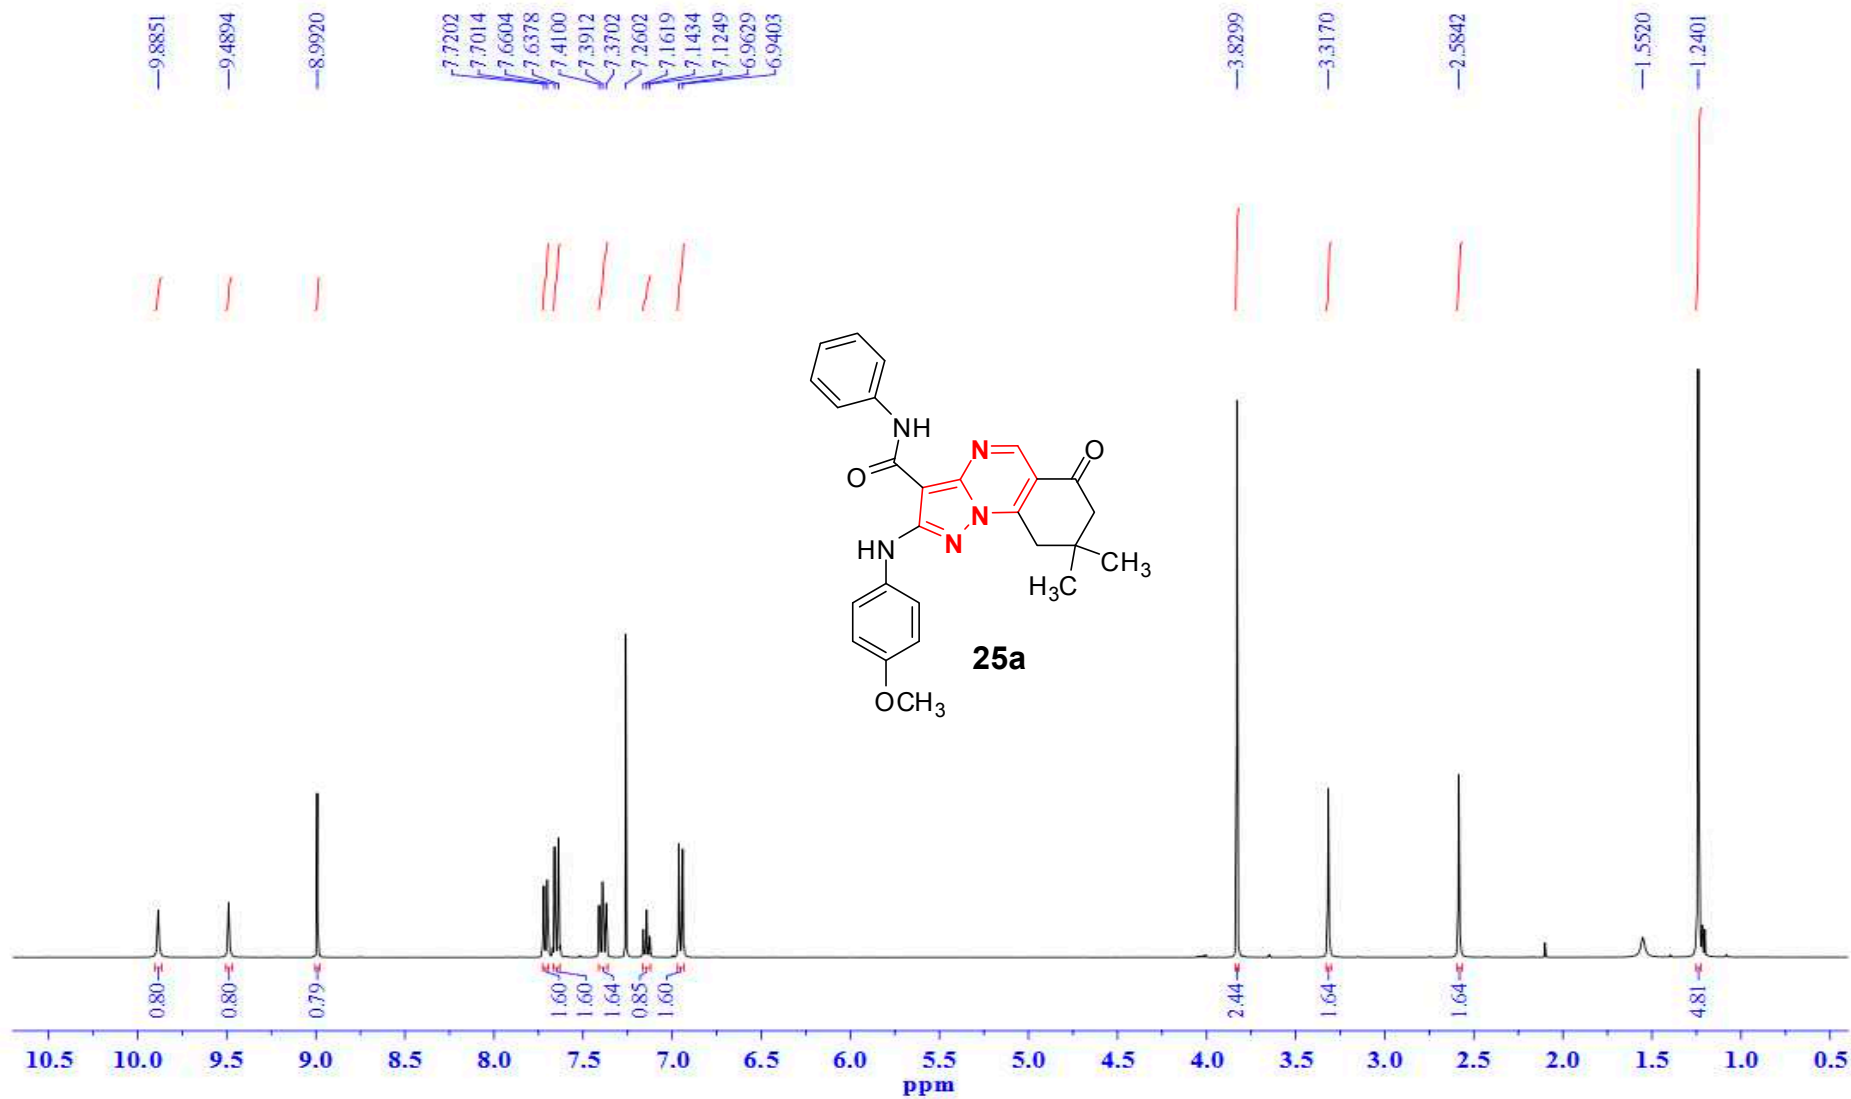

The <sup>1</sup>H NMR (400 MHz) spectrum of compound **25a**

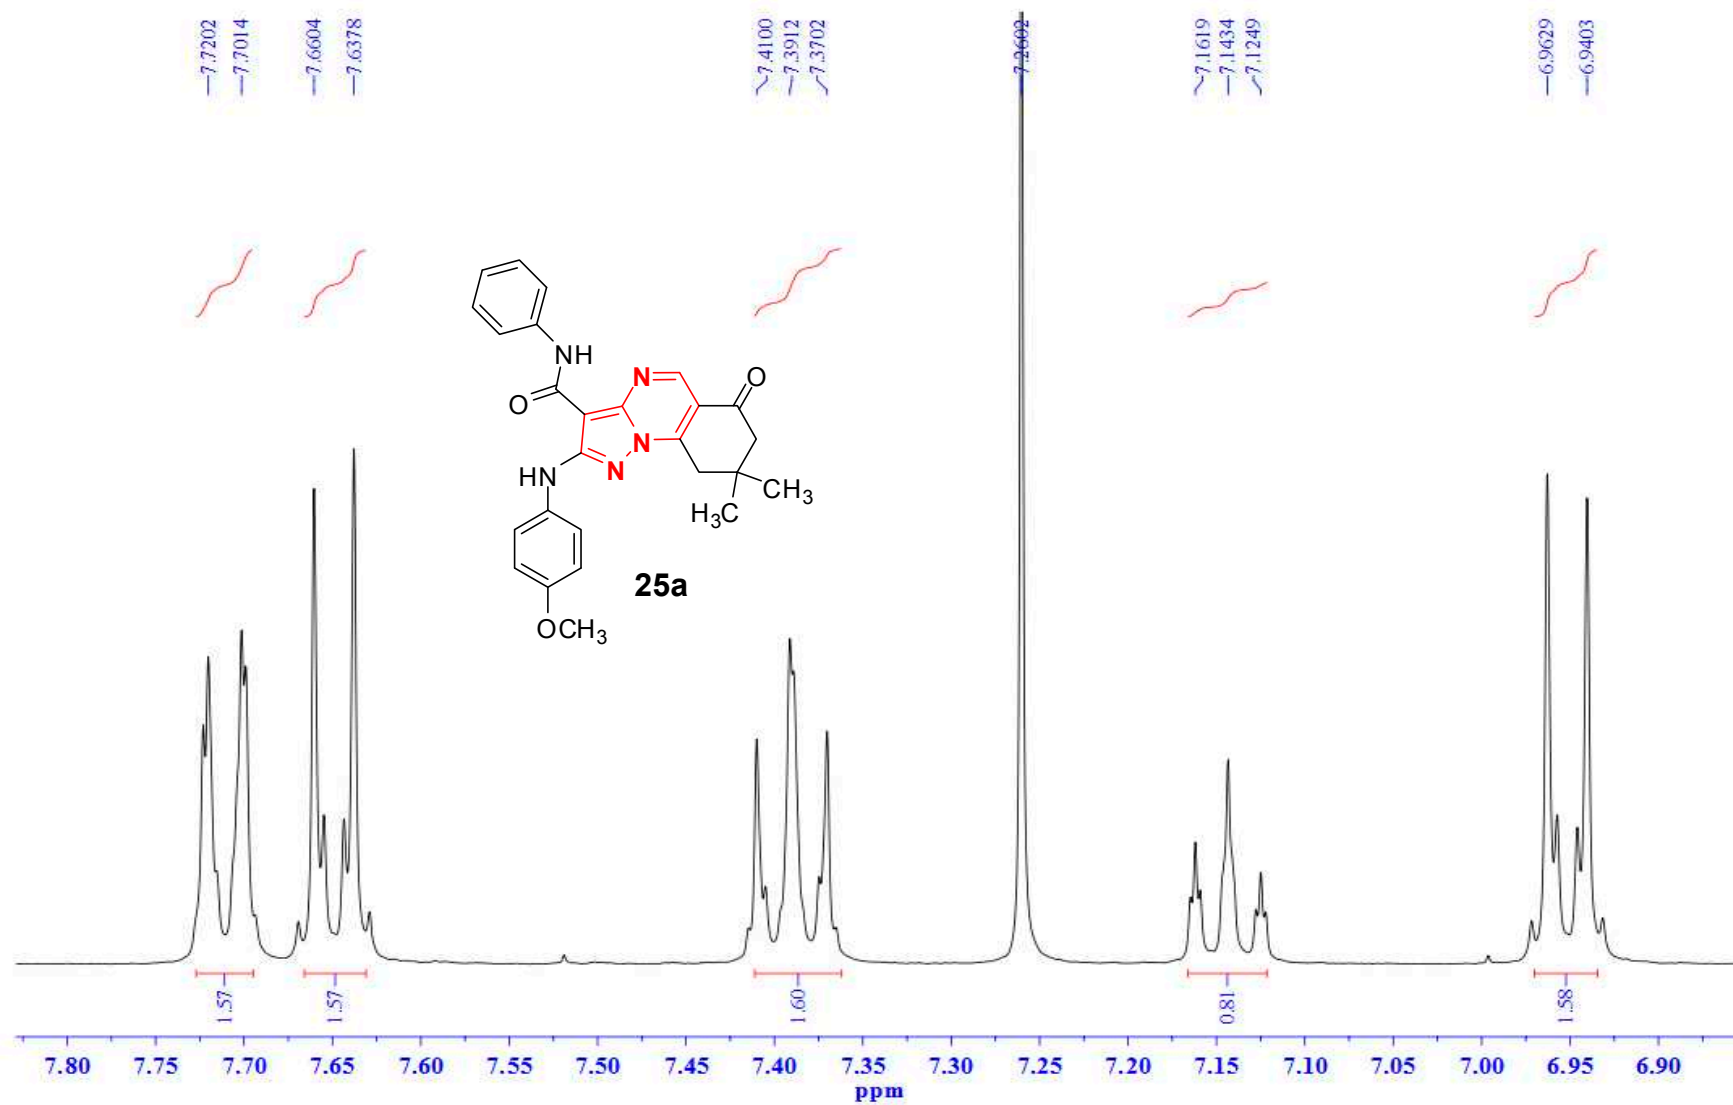

The  $^1\text{H}$  NMR (400 MHz) spectrum (aromatic region) of compound **25a**

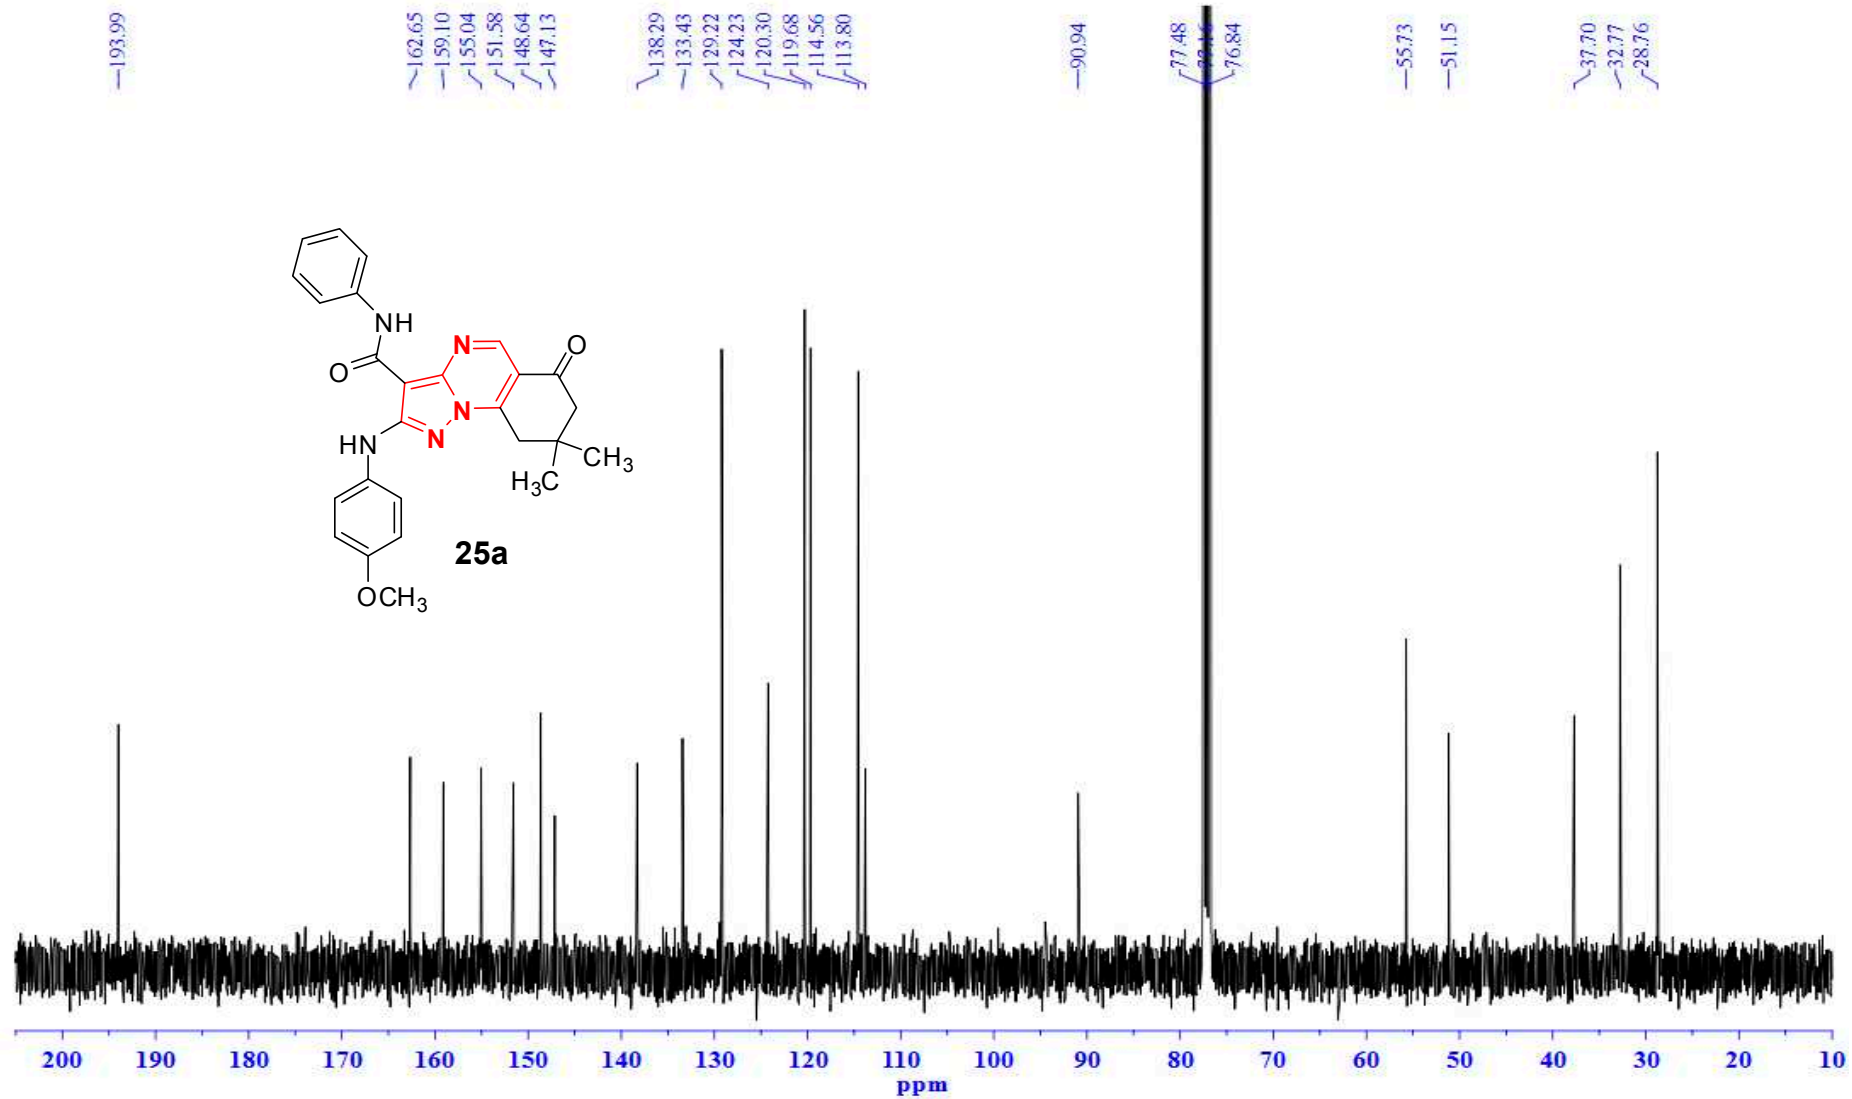

The  $^{13}\text{C}$  NMR (100 MHz) spectrum of compound **25a**

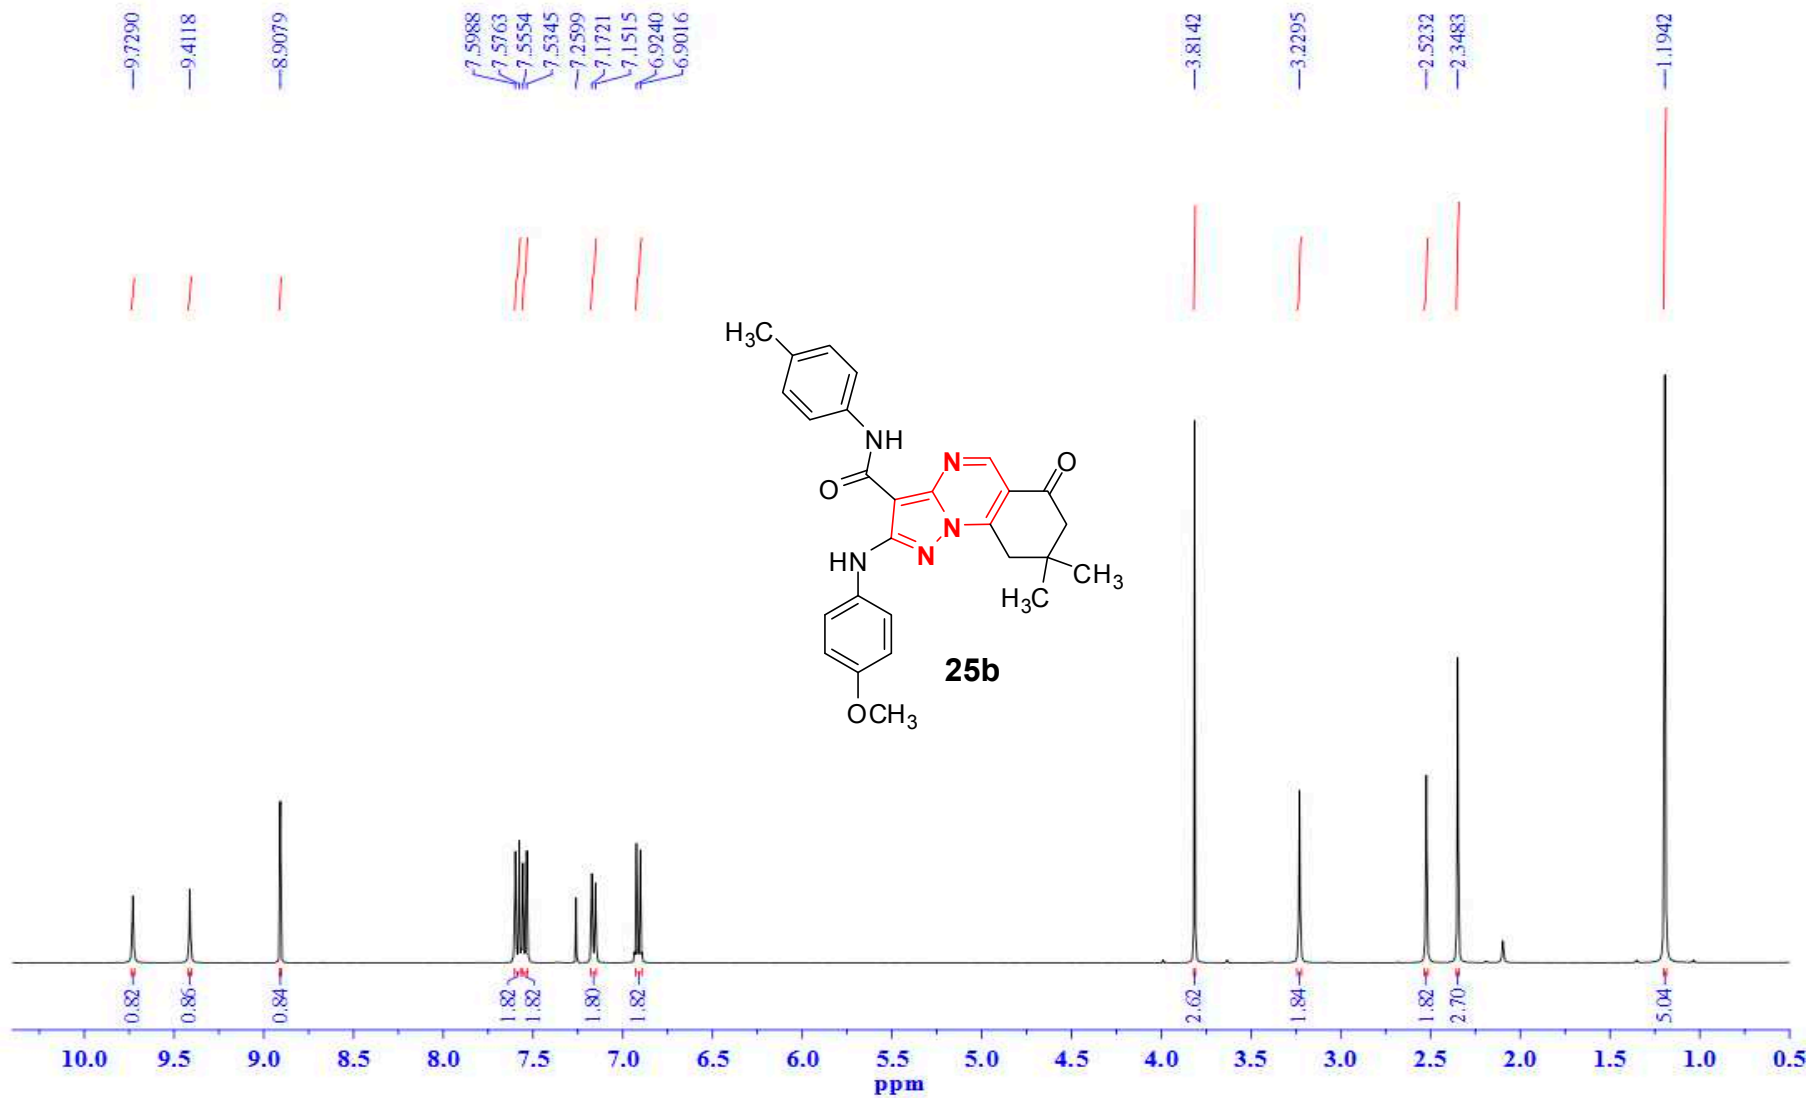

The  $^1\text{H}$  NMR (400 MHz) spectrum of compound **25b**

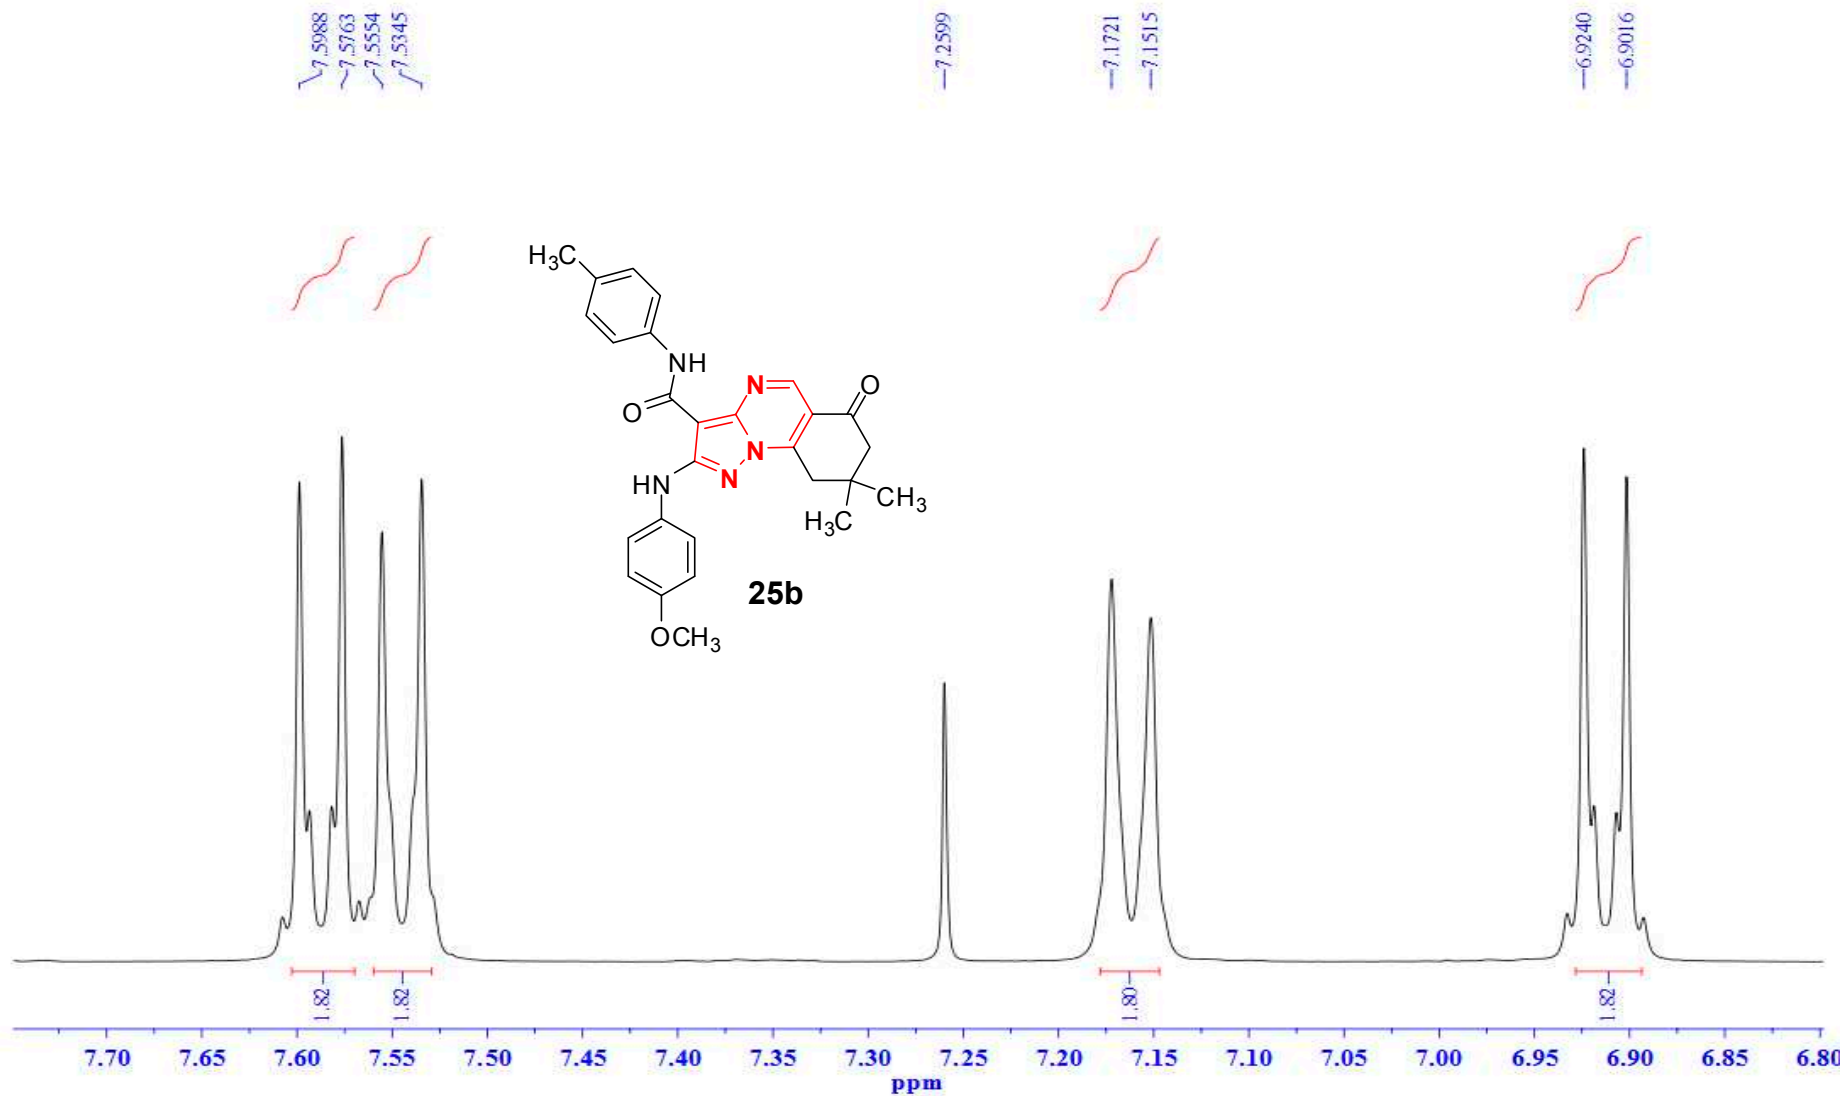

The  $^1\text{H}$  NMR (400 MHz) spectrum (aromatic region) of compound **25b**

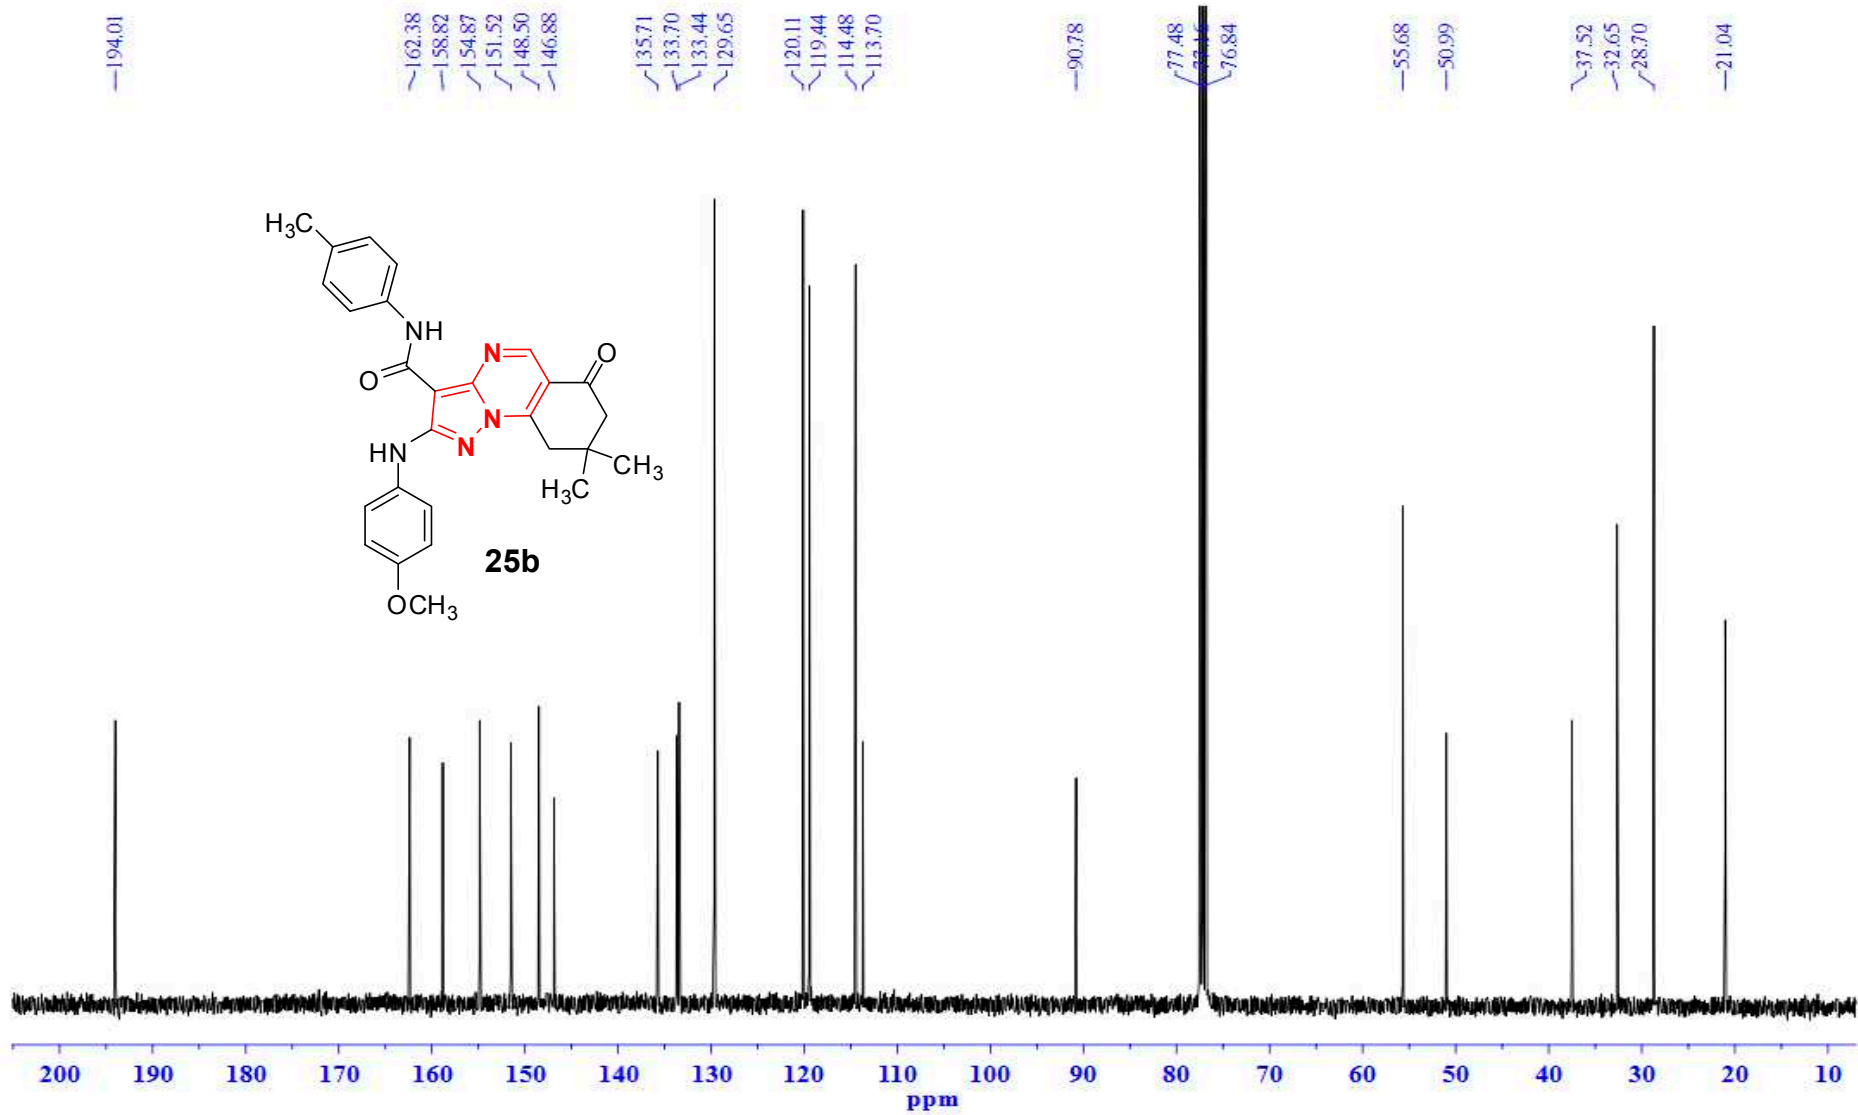

The  $^{13}\text{C}$  NMR (100 MHz) spectrum of compound **25b**

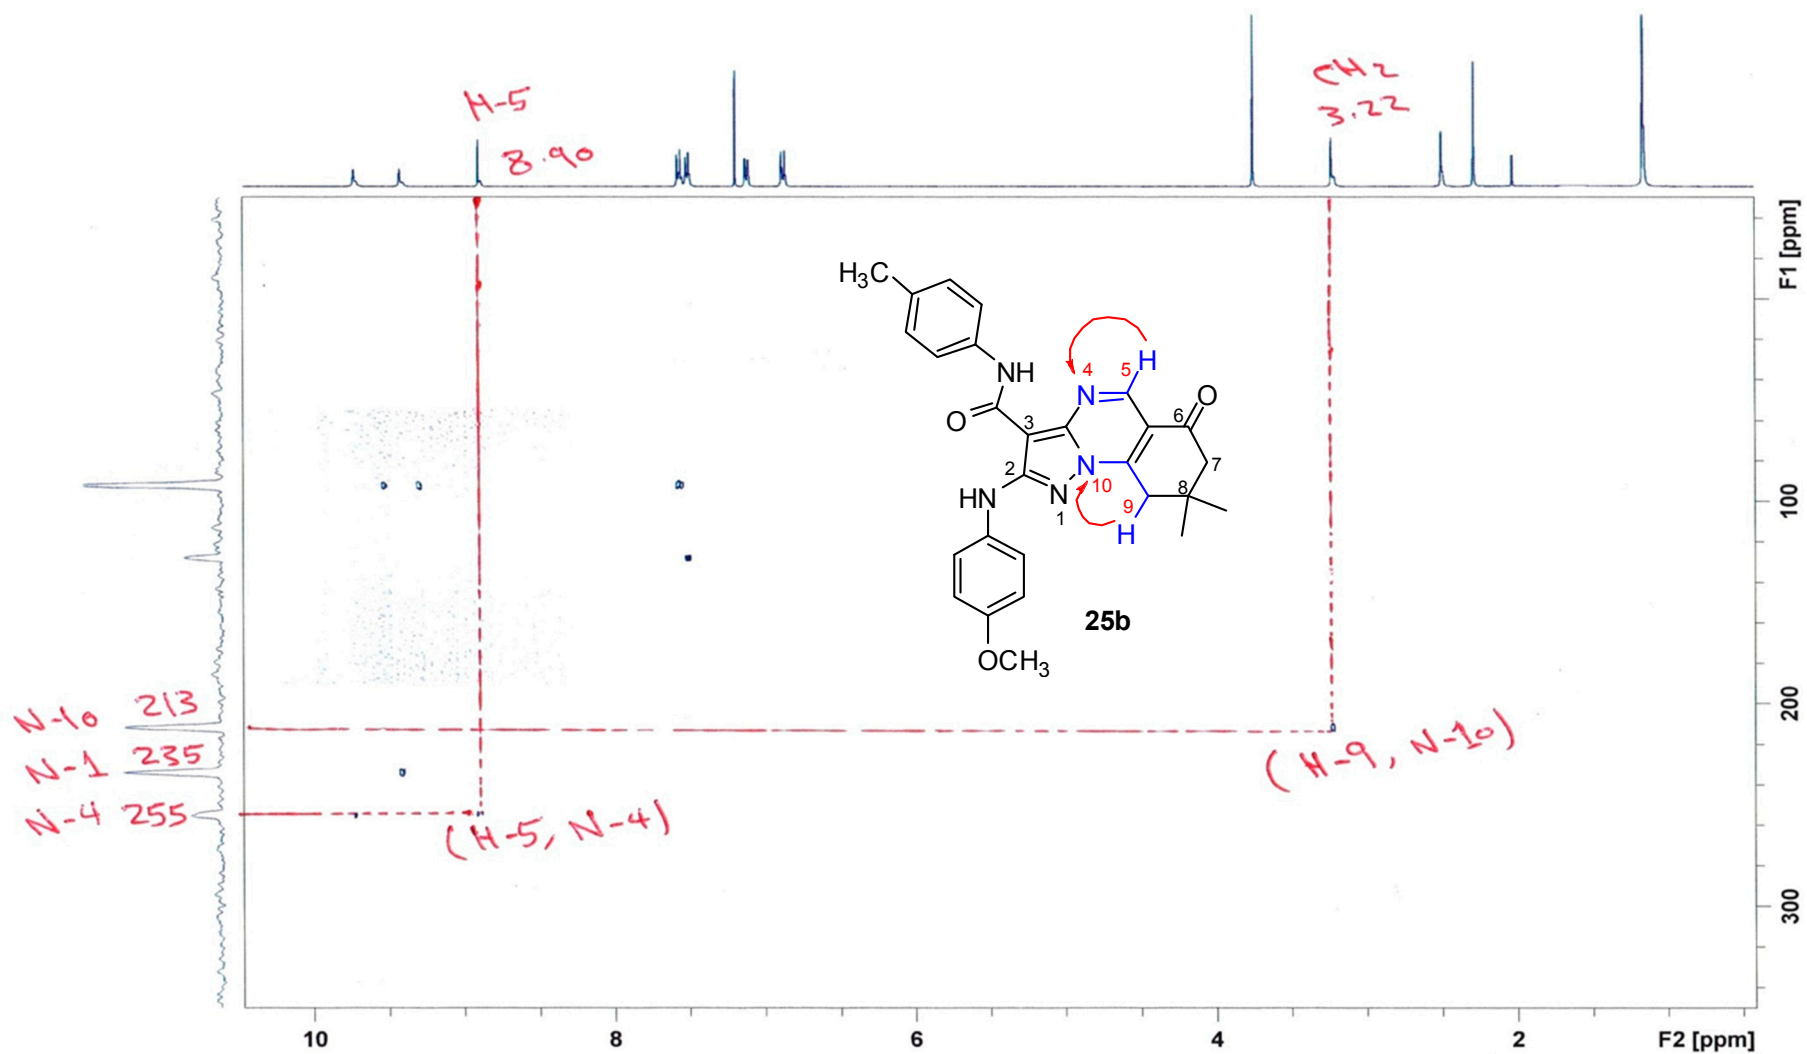

The  $^1\text{H}$ - $^{15}\text{N}$  HMBC (40 MHz) spectrum of compound **25b**
